# Supplementary material
Source: publisher figshare collection journal article supplement (https://gsapubs.figshare.com/articles/dataset/_/28893056)
Supplement: Supplementary file 1 [file 1]

Suarez, C.A., Sharman, G.R., Oefinger, J., Boudreaux, A., Mmasa, D., Crowley, J.L., Mohr, M.T., Marsh, A.D., Milner, A.R.C., and Park Boush, L.E. 2025, A revised chronostratigraphy of the Triassic-Jurassic Moenave Formation, western USA: GSA Bulletin, <https://doi.org/10.1130/B37784.1>.

## Supplemental Material

**Table S1. Detrital zircon samples taken from study sites.** Stratigraphic location, Grain size, depositional environment, number of grains analyzed, and location are indicated.

**Table S2. Carbon-isotopic composition of bulk organic carbon from study sites.** Stratigraphic location, %C, and C-isotope data relative to two age-model-generated ages are presented.

**Table S3. Results of detrital Zircon LA-ICPMS isotopic U-Pb analyzed at the University of Arkansas**

**Table S4. Metadata for LA-ICPMS analysis for Boise State University**

**Table S5. Results of Detrital Zircon LA-ICPMS isotopic U-Pb analyzed at Boise State University.**

**Table S6. Zircon Standard LA-ICPMS isotopic U-Pb and trace element concentration data used at Boise State University**

**Table S7. U-Pb CA-TIMS isotopic data results**

**Table S8. Results of Bayesian age-models.** Two models were generated. The MDA model assumes maximum depositional age distributions and DA model assumes grains represent the depositional age of the strata.

**Table S9. Known taxa from the Moenave Formation by member.**

**Figure S1. Relative %C versus  $\delta^{13}\text{C}_{\text{org}}$ .**

**Figure S2. Detrital zircon age distributions for each study site.**

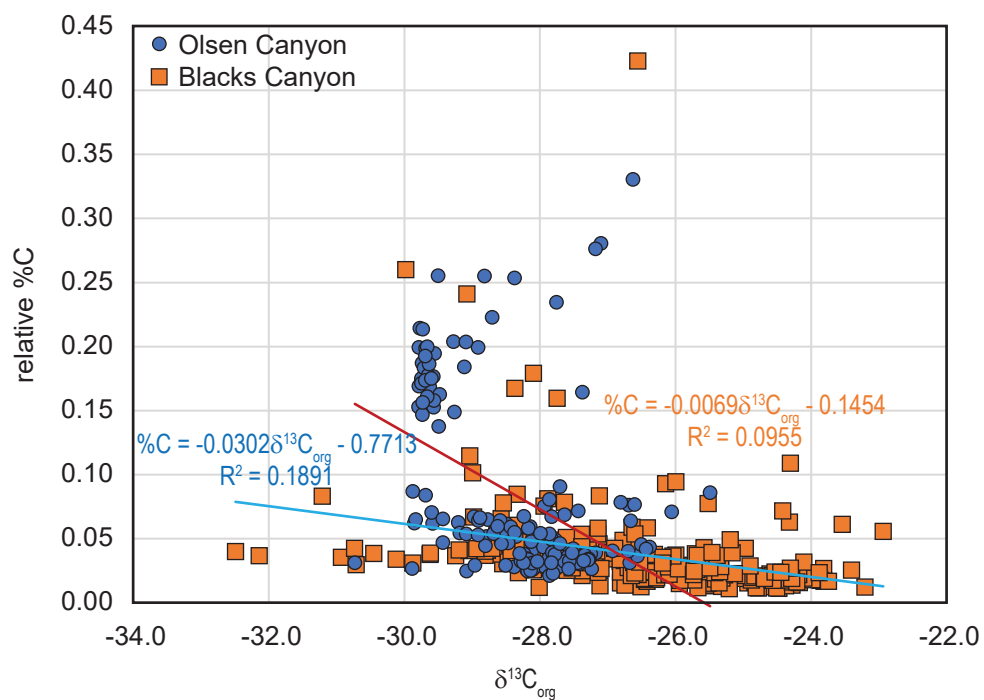

Figure S1. C-isotopic composition of samples relative to the %C preserved in each sample for Blacks Canyon (blue circles) and Olsen Canyon (orange squares). There is a poor correlation between organic C preservation and isotopic composition suggesting %C does not control the C-isotopic composition the sample.

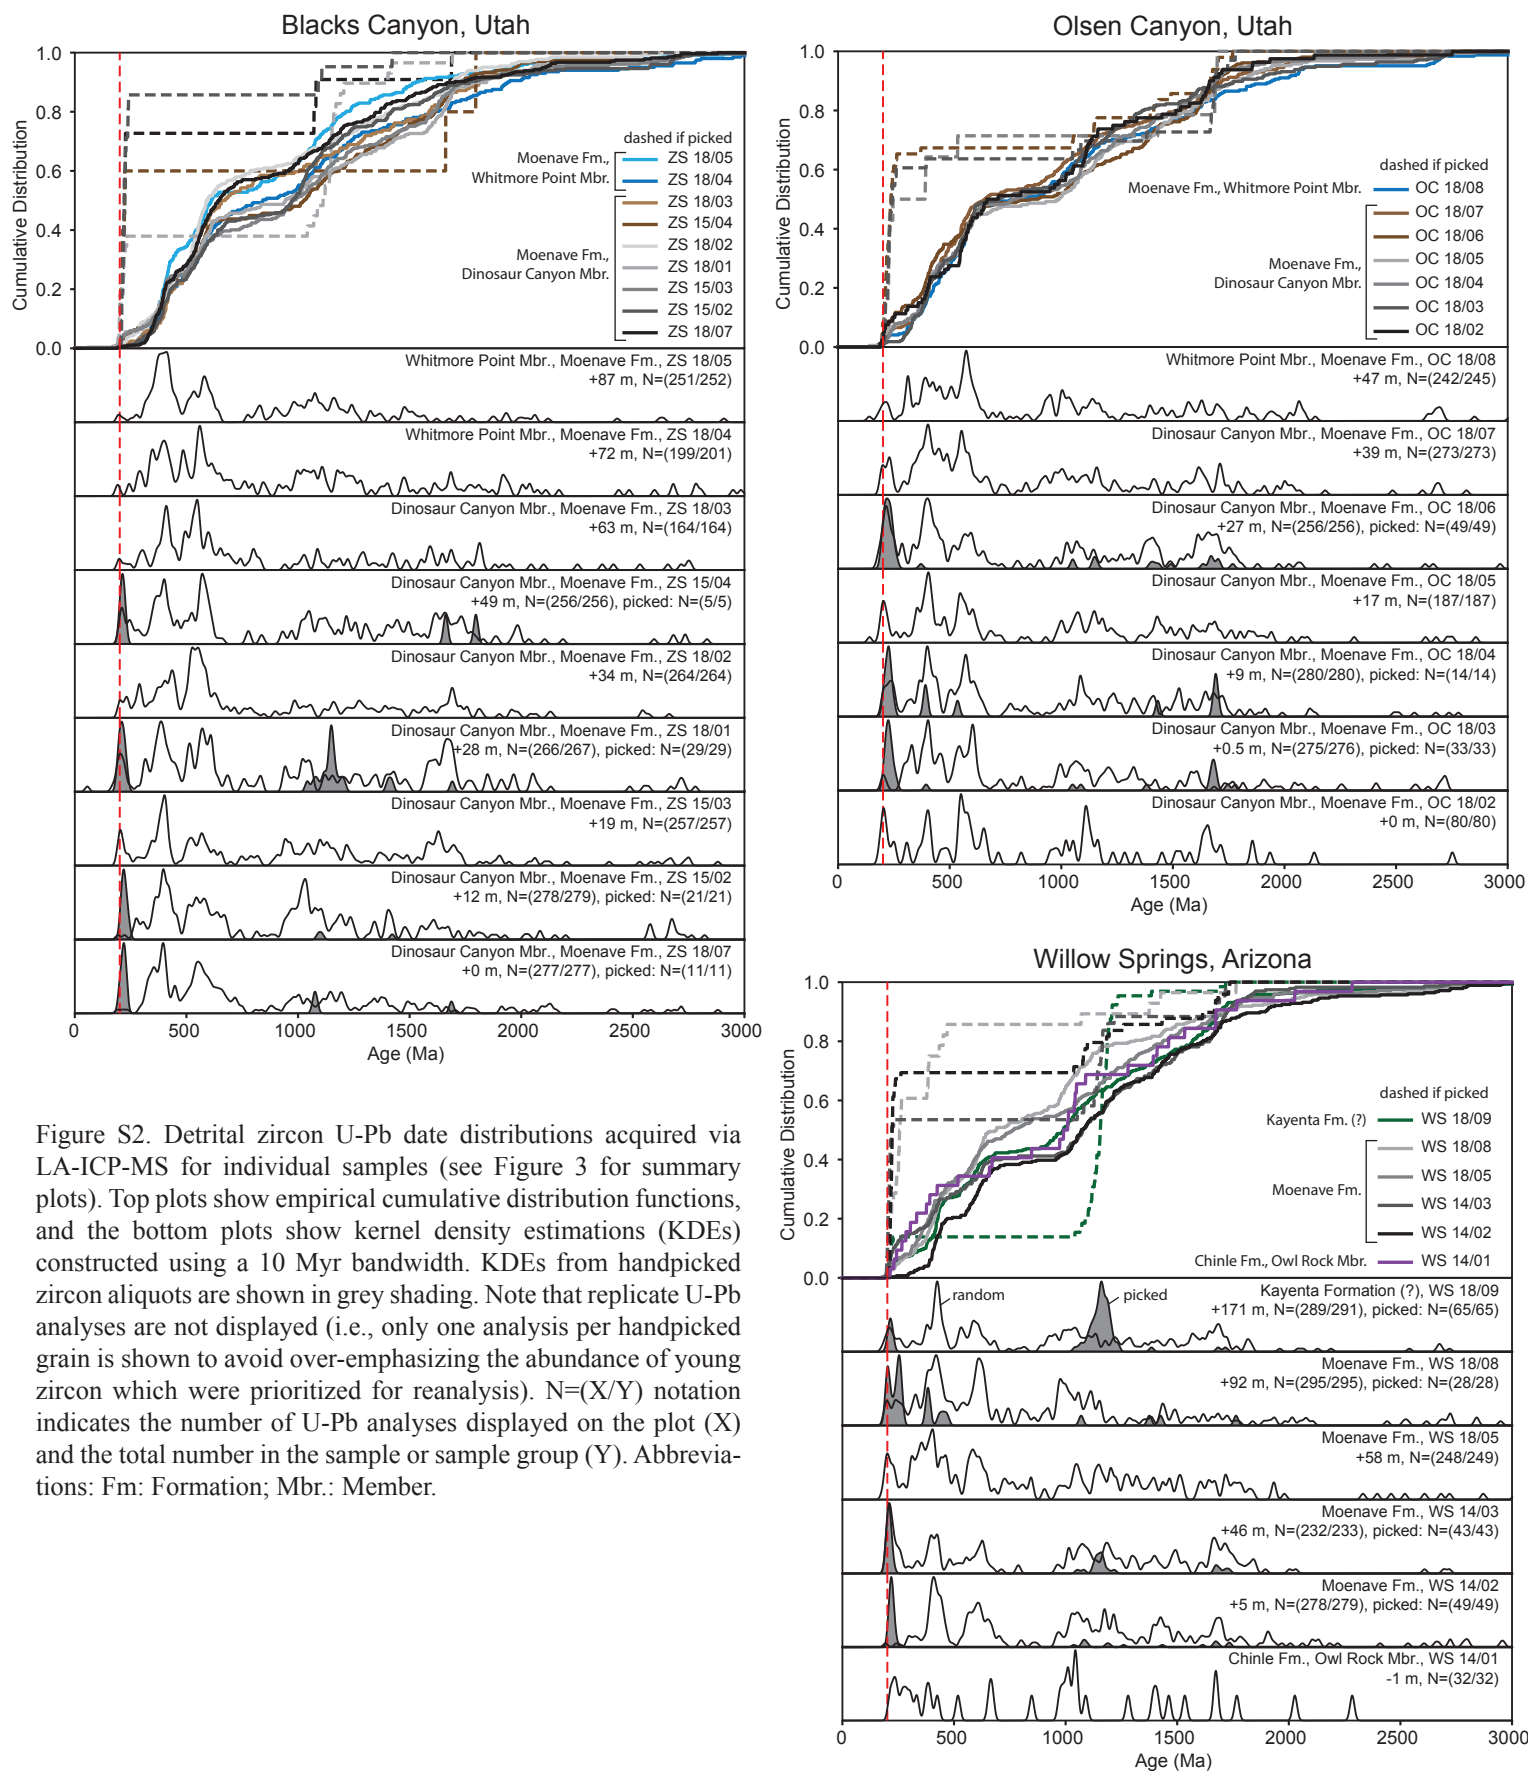

Figure S2. Detrital zircon U-Pb date distributions acquired via LA-ICP-MS for individual samples (see Figure 3 for summary plots). Top plots show empirical cumulative distribution functions, and the bottom plots show kernel density estimations (KDEs) constructed using a 10 Myr bandwidth. KDEs from handpicked zircon aliquots are shown in grey shading. Note that replicate U-Pb analyses are not displayed (i.e., only one analysis per handpicked grain is shown to avoid over-emphasizing the abundance of young zircon which were prioritized for reanalysis). N=(X/Y) notation indicates the number of U-Pb analyses displayed on the plot (X) and the total number in the sample or sample group (Y). Abbreviations: Fm: Formation; Mbr.: Member.

Supplementary Data Table 9: Know Taxa from the Moenave Formation

| <b>Dinosaur Canyon Member</b>    | <b>Whitmore Point Member</b>            |
|----------------------------------|-----------------------------------------|
| <b>Flora</b>                     | <b>Flora</b>                            |
| <i>Equisetum sp.</i>             | <i>Equisetum sp.</i>                    |
| <i>Saintgeorgia jensenii</i>     | <i>Sanmiguelia lewisii</i>              |
| <i>Araucarities stockeyi</i>     | <i>Pagiophyllus sp</i>                  |
| <i>Minerites planus</i>          | Confierales undet                       |
| <i>Podozamites sp.</i>           |                                         |
| <i>Clathropteris cf. walkeri</i> |                                         |
| <b>Vertebrate Traces</b>         | <b>Vertebrate Traces</b>                |
| <i>Batrachopus</i>               | <i>Batrachopus</i>                      |
| <i>Grallator</i>                 | <i>Grallator</i>                        |
| <i>Eubrontes</i>                 | <i>Eubrontes</i>                        |
| <i>Brachychirotherium</i>        | <i>Kayentapus</i>                       |
|                                  | <i>Gigandipus</i>                       |
|                                  | <i>Anomoepus</i>                        |
|                                  | <i>Characichnos</i>                     |
|                                  | Eucynodont synapsid tracks              |
|                                  | <i>Unichnia</i> (two morphotypes)       |
|                                  | <i>Piscichnus</i>                       |
| <b>Vertebrates</b>               | <b>Vertebrates</b>                      |
| <i>Protosuchus richardsoni</i>   | <i>Ceratodus stewarti</i>               |
| Coelophysid                      | <i>Lissodus johnsonorum</i>             |
|                                  | Palaeoniscoidea n. gen. et. sp.         |
|                                  | Mawsoniidae coelacanth, n. gen. et sp.  |
|                                  | <i>Lophionotus kanabensis</i>           |
|                                  | <i>Lophionotus</i> morphotype A         |
|                                  | <i>Lophionotus</i> morphotype B         |
|                                  | <i>Lophionotus</i> morphotype C         |
|                                  | <i>Dilophosaurus</i> -like theropod     |
|                                  | Ceolophysoid theropod teeth             |
|                                  | cf. <i>Ornithischia</i> (partial tooth) |
|                                  | cf. Synapsida (partial tooth)           |
| <b>Invertebrate Traces</b>       | <b>Invertebrate Traces</b>              |
| Arthropod trackway               | <i>Palaeophycus tubularis</i>           |
|                                  | <i>Skolithos</i> isp.                   |
|                                  | <i>Helminoidichnites tenuis</i>         |
|                                  | <i>Scoyenia</i> isp.                    |
|                                  | <i>Lunullipes</i> isp.                  |
|                                  | <i>Siskemia eurypyge</i>                |
|                                  | <i>Kouphichnium</i> isp.                |
|                                  | <i>Diplichnites triassicus</i>          |
|                                  | cf. <i>Treptichnus</i>                  |
|                                  | cf. <i>Margaritichnus</i>               |
|                                  | cf. <i>Rhizocorallium</i>               |

**Ostracoda**

- Lockeia*
- Ostracoda**
- Suchonellina globosa*
- Suchonellina stricta*
- Whipplella cuneiformis*
- Whipplella* sp. 2?

**Conchostraca**

- Conchostraca**
- Euestheria brodieana*
- Bulbilimnadia killianorum*

**Mollusca**

**Mollusca**

**Total taxa**

Unionid  
**14**

**44**
