# Supplementary material
Source: publisher figshare collection journal article supplement (https://gsapubs.figshare.com/articles/dataset/_/28893056)
Supplement: Supplementary file 1 [file 1]

## Sheet: Table S5 Sample data
Table S5: Detrital zircon LA-ICPMS isotopic U-Pb and trace element concentration data (Boise State University)
								Corrected isotope ratios															Dates (Ma)											207-corrected		208-corrected			Concentrations (ppm)
	CA-TIMS	U	Th	Pb*		206Pb		208Pb*	±2s	206Pb*	±2s	207Pb*	±2s	206Pb*	±2s	error	238U	±2s	207Pb*	±2s	error		208Pb*	±2s	207Pb*	±2s	207Pb*	±2s	206Pb*	±2s		%		206Pb*	±2s	206Pb*	±2s
Analysis	label	ppm	ppm	ppm	Th/U	204Pb		232Th	(%)	207Pb*	(%)	235U*	(%)	238U	(%)	corr.	206Pb*	(%)	206Pb*	(%)	corr.		232Th	(Ma)	206Pb*	(Ma)	235U	(Ma)	238U*	(Ma)		disc.		238U*	(Ma)	238U*	(Ma)		P	Ti	Y	Zr	Nb	La	Ce	Pr	Nd	Sm	Eu
OC18/03_S25 7/11/2020 1:58:42 AM (Run: 1)		144.678	81.578	57.4568	0.563857	1732.13		0.0842462	3.26525	9.19162	0.994593	4.72627	2.03122	0.315072	1.77105	0.864284	3.17388	1.77105	0.108795	0.994593	-2.52315e-16		1634.86	51.2804	1779.34	18.1409	1771.91	17.0229	1765.62	27.3533		0.771416		1772.61	30.6213	1776.18	499.404		146.292	9.51425	689.17	1.00515e+06	3.34407		8.31534	0.0363785	0.62735	2.13182	0.0520199
OC18/03_S32 7/11/2020 2:12:23 AM (Run: 1)		103.242	64.9876	40.2982	0.62947	2907.32		0.0796105	2.77265	9.36482	1.73063	4.55947	2.90819	0.30968	2.3372	0.799614	3.22914	2.3372	0.106783	1.73063	0		1548.26	41.3248	1745.21	31.7001	1741.89	24.2178	1739.13	35.6256		0.348312		1735.76	39.8129	1742.22	762.228		295.029	11.8702	1502.77	1.03929e+06	3.01038		5.16227	0.0134344	0.843601	3.30781	0.266286
OC18/03_M17 7/11/2020 1:37:00 AM (Run: 1)		105.665	80.6335	43.6803	0.763107	55174.6		0.0990877	2.88516	9.74604	1.78267	4.35716	3.65506	0.307985	3.19086	0.870648	3.24691	3.19086	0.102606	1.78267	1.55308e-16		1909.65	52.5738	1671.79	32.9572	1704.25	30.1852	1730.79	48.4343		-3.52912		1699.71	54.1218	1703.99	1411.04		270.33	15.827	1076.24	859284	3.13428		13.0993	0.133804	2.02237	4.38063	0.968091
OC18/03_M12 7/11/2020 1:19:08 AM (Run: 1)		129.569	91.3498	51.1854	0.705031	1113.33		0.0989452	2.21414	9.70397	1.47898	4.19315	2.72196	0.295113	2.2851	0.83511	3.38853	2.2851	0.103051	1.47898	1.31305e-16		1907.03	40.2937	1679.79	27.3148	1672.68	22.3163	1667.03	33.5664		0.759466		1672.11	37.1314	1643.6	675.207		280.615	16.2879	910.954	836130	4.02155	0.0240146	15.8014	0.0907213	2.13609	4.17032	0.617408
OC18/03_M15 7/11/2020 1:33:06 AM (Run: 1)		141.175	79.6457	52.9006	0.564162	1236.59		0.0928334	2.67658	9.65565	1.2939	4.17209	2.96248	0.292169	2.66498	0.89611	3.42268	2.66498	0.103566	1.2939	0		1794.31	45.9561	1689.01	23.8684	1668.56	24.2646	1652.36	38.8442		2.17002		1668.43	42.7927	1641.61	538.207		270.725	12.1231	1269.15	859601	2.88043	0.00570805	7.65208	0.114781	2.0031	5.09177	0.548151
OC18/03_S22 7/11/2020 1:46:49 AM (Run: 1)		255.284	192.133	98.6892	0.752627	60788.5		0.0778127	2.85242	9.7671	1.22086	4.11876	2.40847	0.291763	2.07611	0.856521	3.42744	2.07611	0.102385	1.22086	1.78687e-16		1514.57	41.6231	1667.79	22.5822	1658.03	19.6777	1650.33	30.2285		1.04672		1674.1	33.3605	1695.32	1446.54		212.429	9.47719	1251.55	990332	5.45921		20.7777	0.0504261	1.11721	3.84037	0.467423
OC18/03_M14 7/11/2020 1:31:09 AM (Run: 1)		183.106	117.433	70.6844	0.641338	1643.4		0.0964156	2.22201	9.69151	0.928572	4.14721	2.7323	0.291505	2.56967	0.936581	3.43047	2.56967	0.103183	0.928572	0		1860.45	39.494	1682.14	17.1445	1663.66	22.3533	1649.05	37.3892		1.96757		1670.33	41.155	1644.16	1195.4
OC18/03_S30 7/11/2020 2:08:28 AM (Run: 1)		148.184	126.303	55.9516	0.852342	814.021		0.0737578	2.73504	9.6882	1.52794	4.06667	2.82707	0.285746	2.3786	0.837277	3.49961	2.3786	0.103218	1.52794	-2.43977e-16		1438.39	37.9733	1682.77	28.2086	1647.65	23.04	1620.24	34.0773		3.71617		1646.45	37.3996	1638.26	1077.37		183.632	9.90689	1125.98	1.01465e+06	3.52211		15.4692	0.0706622	1.6875	3.73324	0.459744
OC18/03_M8 7/11/2020 1:11:19 AM (Run: 1)		272.736	151.572	103.631	0.555744	2452.54		0.103866	2.28647	9.62273	0.74193	4.0818	2.70438	0.284871	2.60062	0.957747	3.51036	2.60062	0.103921	0.74193	-2.35847e-16		1997.34	43.4846	1695.29	13.6755	1650.67	22.0563	1615.85	37.1693		4.68628		1670.73	40.66	1626.11	1014.88		178.484	8.48408	825.302	797067	4.70883		17.1535	0.0934813	1.2003	2.60748	0.26645
OC18/03_M10 7/11/2020 1:15:14 AM (Run: 1)		223.357	107.823	68.3007	0.482736	3270.12		0.0828184	2.7072	11.366	0.876378	2.93924	1.78584	0.242292	1.55602	0.861472	4.12725	1.55602	0.087982	0.876378	0		1608.22	41.8509	1382.1	16.8371	1392.08	13.5299	1398.6	19.5636		-1.1938		1398.31	21.0468	1396.26	984.566		547.926	15.5836	1584.11	821924	3.57044	0.0899502	12.1419	0.0950407	1.89448	5.48878	0.451675
OC18/03_M3 7/11/2020 1:01:34 AM (Run: 1)		178.758	42.5059	38.3273	0.237784	1408.58		0.0679051	4.33917	13.4523	0.880283	1.89933	2.92277	0.185308	2.78706	0.950216	5.39642	2.78706	0.0743368	0.880283	0		1327.91	55.7685	1050.61	17.7407	1080.85	19.4414	1095.91	28.0884		-4.31119		1077.98	29.5215	1084.08	287.667		161.334	8.42455	501.35	768951	5.719		6.30005	0.019773	0.27978	1.71775	0.0135078
OC18/03_M6 7/11/2020 1:07:25 AM (Run: 1)		215.999	95.9264	49.2846	0.444106	2531.63		0.0678446	2.42056	13.2072	1.54731	1.92258	3.84885	0.184161	3.52413	0.913618	5.43005	3.52413	0.075716	1.54731	-1.62828e-16		1326.77	31.0839	1087.57	31.0112	1088.97	25.7087	1089.66	35.331		-0.192242		1088.74	37.0368	1074.52	897.163		232.211	11.9438	786.359	814907	6.25411		9.92428	0.0354781	1.18817	3.08466	0.195483
OC18/03_S20 7/11/2020 1:42:54 AM (Run: 1)		398.931	263.941	30.8307	0.661622	901.433		0.0172085	3.08968	17.7778	1.89909	0.489111	3.00905	0.0630643	2.33405	0.771776	15.8568	2.33405	0.05625	1.89909	1.98227e-16		344.862	10.5647	462.234	42.0931	404.304	10.0355	394.234	8.92591		14.7111		400.891	9.02033	394.978	1720.64		3430.79	15.2332	18266.4	1.00044e+06	6.98589	0.113209	11.2738	0.85596	17.6859	52.2586	6.2274
OC18/03_S24 7/11/2020 1:56:45 AM (Run: 1)		237.925	191.447	12.2652	0.804651	2201.4		0.0111878	4.33144	19.8526	4.151	0.286744	5.19137	0.0412869	3.11762	0.598843	24.2208	3.11762	0.0503711	4.151	1.34673e-16		224.874	9.68631	212.191	96.181	255.994	11.7467	260.805	7.96862		-22.9103		251.639	8.07109	260.219	2234.92		330.155	5.26594	2238.8	989585	5.21763		20.6391	0.106313	1.93815	6.79935	1.84026
OC18/03_M9 7/11/2020 1:13:17 AM (Run: 1)		229.205	192.075	12.3821	0.838002	340.241		0.01483	5.39019	19.4007	3.18609	0.286448	3.97208	0.0403053	2.37198	0.594261	24.8107	2.37198	0.0515445	3.18609	0		297.544	15.9207	265.298	73.1162	255.76	8.98053	254.725	5.9242		3.98544		251.572	5.9874	243.276	2193.86		103.559	8.83091	333.742	808884	0.790727		14.157	0.0286345	0.541089	1.25473	0.613625
OC18/03_S28 7/11/2020 2:04:34 AM (Run: 1)		103.06	123.628	5.32091	1.19957	72.7331		0.00985888	4.8748	17.6019	3.21857	0.301622	4.20737	0.0385053	2.70976	0.64164	25.9704	2.70976	0.0568122	3.21857	-1.99219e-16		198.293	9.61914	484.276	71.067	267.667	9.89964	243.561	6.47681		49.7061		262.936	6.48377	247.071	3361.24		157.683	13.7479	751.519	1.01283e+06	1.66854		19.9622	0.0727798	1.23775	3.48367	1.05972
OC18/03_M13 7/11/2020 1:29:11 AM (Run: 1)		82.4251	73.5843	4.27402	0.892741	590.445		0.0137936	4.79601	19.9215	6.80162	0.266467	6.92879	0.0385003	1.32137	0.187718	25.9738	1.32137	0.050197	6.80162	-7.7312e-16		276.893	13.1893	204.116	157.833	239.865	14.8025	243.53	3.15791		-19.3095		235.075	3.34037	232.281	2236.91		176.046	10.8755	737.955	840793	2.90752		19.6155	0.0469076	0.702683	3.20648	0.971352
OC18/03_M7 7/11/2020 1:09:22 AM (Run: 1)		456.659	273.684	21.7903	0.599319	703.208		0.0143547	3.07433	19.2587	2.5308	0.270047	3.41788	0.0377194	2.29716	0.668622	26.5115	2.29716	0.0519247	2.5308	1.50601e-16		288.076	8.7936	282.096	57.904	242.732	7.37917	238.681	5.38264		15.3899		239.734	5.42415	230.144	1511.2		88.4258	2.64678	377.541	800347	1.11149	0.0206276	16.6261	0.0510819	0.597286	1.10544	0.571156
OC18/03_S18 7/11/2020 1:39:00 AM (Run: 1)		92.0538	193.976	5.67864	2.1072	428.495		0.0113267	7.24076	21.5461	3.63203	0.236508	4.96763	0.0369583	3.38906	0.680601	27.0575	3.38906	0.0464122	3.63203	-1.41129e-16		227.65	16.3911	19.0435	87.2338	215.557	9.64779	233.951	7.7866		-1128.51		210.936	7.91213	229.449	6269.78		468.425	6.99013	2337.07	972749	1.97597		28.5195	0.178146	4.65638	8.45504	3.06591
OC18/03_S19 7/11/2020 1:40:57 AM (Run: 1)		184.045	647.161	13.995	3.51631	395.845		0.0108275	2.60878	18.5556	4.9388	0.273262	5.69771	0.036775	2.84115	0.496955	27.1924	2.84115	0.0538921	4.9388	0		217.67	5.64807	366.574	111.31	245.298	12.4163	232.812	6.4965		36.4899		241.084	6.5507	239.808	17526.1		387.569	17.5717	5242.75	984058	5.03991	0.117003	113.693	0.827993	17.5987	29.1684	8.99906
OC18/03_L1 7/11/2020 12:49:33 AM (Run: 1)		164.244	75.7895	7.07869	0.461444	137.436		0.0124658	8.49209	20.5524	6.15012	0.24404	6.60407	0.0363767	2.40618	0.362632	27.4901	2.40618	0.048656	6.15012	2.35039e-16		250.402	21.1332	131.258	144.641	221.723	13.1543	230.335	5.44443		-75.4824		217.387	5.56335	223.741	1200.01		161.572	8.0713	476.262	887201	2.61073		13.3731		0.518726	1.13768	0.413502
OC18/03 S 14 7/12/2020 2:25:51 PM (Run: 1)		137.61	185.948	6.91141	1.35127	2743.05		0.00930396	4.36052	20.1344	5.90956	0.245624	6.94593	0.0358681	3.65007	0.524088	27.88	3.65007	0.0496662	5.90956	3.29435e-16		187.184	8.1245	179.412	137.753	223.015	13.9073	227.17	8.14746		-26.6195		222.955	8.25321	237.324	3923.38		233.362	6.21816	1569.99	882180	1.7151	0.286246	35.1593	0.276767	5.16612	7.58134	2.93345
OC18/03_M4 7/11/2020 1:03:31 AM (Run: 1)		172.969	161.693	8.59944	0.934811	16187.2		0.0137071	4.20235	19.7861	4.18225	0.249858	4.82499	0.0358553	2.40612	0.496326	27.8899	2.40612	0.0505405	4.18225	1.72942e-16		275.168	11.4852	219.932	96.7698	226.461	9.79399	227.091	5.36894		-3.25518		222.33	5.437	213.969	2644.04		294.896	24.3032	772.077	794851	1.70398		13.2304	0.0978326	2.05313	4.17455	0.78501
OC18/03_S27 7/11/2020 2:02:36 AM (Run: 1)		126.124	163.079	6.20513	1.293	179.188		0.00976612	4.7409	19.9726	6.80708	0.245738	7.23892	0.0355963	2.46285	0.338682	28.0928	2.46285	0.0500687	6.80708	2.07336e-16		196.437	9.26774	198.225	158.126	223.108	14.4994	225.479	5.4572		-13.749		218.736	5.57683	226.517	3736.45		257.46	10.3499	1139.97	1.00493e+06	2.47009		19.9658	0.0676449	1.46527	3.08268	0.868466
OC18/03_M11 7/11/2020 1:17:11 AM (Run: 1)		460.89	286.054	20.2734	0.620655	784.551		0.0117103	1.97234	19.8431	2.70551	0.24658	3.6602	0.0354868	2.46521	0.670489	28.1795	2.46521	0.0503953	2.70551	0		235.316	4.61431	213.296	62.6757	223.794	7.35143	224.797	5.44621		-5.39226		220.782	5.49608	220.084	811.564		355.738	17.4771	1683.68	822512	5.90769	0.00209097	23.9417	0.14298	2.90031	5.46429	1.66039
OC18/03_M16 7/11/2020 1:35:02 AM (Run: 1)		225.675	204.516	10.5044	0.906242	934.377		0.0113981	2.91188	18.451	4.14933	0.261838	4.65484	0.035039	2.10964	0.450425	28.5396	2.10964	0.0541975	4.14933	-3.97936e-16		229.077	6.63277	379.306	93.307	236.147	9.80762	222.009	4.60384		41.4698		232.286	4.64587	215.964	2393.32		237.622	7.80097	888.295	856294	2.18815	0.0555246	20.3602	0.0759079	1.2728	2.8149	1.05287
OC18/03_L2 7/11/2020 12:51:30 AM (Run: 1)		124.821	60.6477	5.17946	0.485879	147.408		0.0114712	8.57181	19.9043	6.43474	0.242143	7.19079	0.0349556	3.20961	0.445168	28.6077	3.20961	0.0502405	6.43474	-1.68316e-16		230.537	19.649	206.134	149.264	220.173	14.2333	221.489	6.9882		-7.449		215.887	7.09042	215.72	1155.23		182.026	9.87822	716.94	835966	2.11803		11.376	0.0308134	1.49059	2.45738	1.06661
OC18/03_S26 7/11/2020 2:00:39 AM (Run: 1)		224.386	254.983	10.6328	1.13636	562.178		0.0100969	4.07676	19.3813	4.56316	0.247875	5.2364	0.0348428	2.56854	0.488475	28.7004	2.56854	0.0515962	4.56316	-1.48546e-16		203.056	8.23667	267.565	104.677	224.848	10.5615	220.786	5.57498		17.4832		220.912	5.6365	219.228	3191.12		247.487	11.8483	1743.47	1.00015e+06	2.35798		20.4539	0.202478	2.84559	6.50025	1.89743
OC18/03_S29 7/11/2020 2:06:31 AM (Run: 1)		498.131	291.846	19.8309	0.585882	1212.27		0.00884967	3.53175	19.6927	2.22178	0.234382	3.35354	0.0334757	2.51196	0.745784	29.8724	2.51196	0.0507801	2.22178	0		178.084	6.26186	230.858	51.3062	213.81	6.46559	212.265	5.24517		8.0538		210.824	5.28137	211.98	1499.74		324.049	6.47406	2785.6	1.03831e+06	3.11736	0.0254703	9.34939	0.0503486	1.43025	3.93132	0.897169
OC18/03_S21 7/11/2020 1:44:52 AM (Run: 1)		243.52	322.742	11.5871	1.32532	589.083		0.00987402	4.4604	18.8799	4.51462	0.244001	4.90056	0.0334111	1.90622	0.386046	29.9302	1.90622	0.0529663	4.51462	0		198.596	8.81482	327.357	102.46	221.691	9.75991	211.862	3.97291		35.2813		217.989	4.02768	210.088	1864.9		289.456	12.9916	1826.97	999382	3.63996	0.0115058	24.0086	0.0792147	2.49525	7.10363	0.844676
OC18/03_S31 7/11/2020 2:10:26 AM (Run: 1)		398.912	988.015	22.2653	2.47677	268		0.00863808	2.39644	20.1167	4.08673	0.228663	4.96378	0.0333619	2.8174	0.565626	29.9743	2.8174	0.0497099	4.08673	-3.03271e-16		173.844	4.14822	181.446	95.2272	209.094	9.38005	211.555	5.86362		-16.5938		205.812	5.92843	228.162	9430.34		600.957	20.3623	8324.49	1.04921e+06	7.26565	0.00840673	104.755	0.325302	9.54942	29.0594	10.8461
OC18/03_S33 7/11/2020 2:20:21 AM (Run: 1)		844.462	515.88	34.0417	0.610898	466.148		0.00921789	2.13736	19.0356	2.22438	0.241013	3.40094	0.0332739	2.57265	0.753304	30.0535	2.57265	0.0525333	2.22438	1.53694e-16		185.46	3.94582	308.698	50.6511	219.249	6.70645	211.006	5.34056		31.6463		217.479	5.36142	211.357	#VALUE!		212.649	12.1072	5331.32	1.02509e+06	14.7283		26.2621	0.0268129	1.18222	7.37233	4.77014
OC18/03_S23 7/11/2020 1:54:47 AM (Run: 1)		145.553	251.621	7.21373	1.72873	370.834		0.00924927	3.79516	19.3577	5.22864	0.232321	5.70556	0.0326167	2.28359	0.398133	30.6591	2.28359	0.051659	5.22864	-2.91211e-16		186.088	7.02994	270.354	119.882	212.113	10.9218	206.905	4.64984		23.469		208.131	4.7161	208.35	2775.68		187.622	6.76327	2141.5	1.00908e+06	1.23321		40.442	0.422186	8.00786	14.5613	5.57795
Experiment on July 10, 2020
Isotope ratio and date errors do not include systematic calibration errors of 0.24% (207Pb/206Pb) and 0.64% (206Pb/238U) (2 sigma).
Trace element concentrations were deleted from analyses known to have intersected inclusions of other minerals based on P and Ti.
Ablation used a laser spot size of 25 microns and a laser firing repetition rate of 5 Hz.
Activity of TiO2 for Ti-in-Zircon temperature calculation is 0.8.
OC18/04 XS 41 7/12/2020 3:42:58 PM (Run: 1)		111.928	97.7173	46.7347	0.873037	1372.66		0.100322	2.75888	9.66439	1.55596	4.26348	3.23539	0.298839	2.83668	0.872873	3.34628	2.83668	0.103473	1.55596	0		1932.35	50.8421	1687.34	28.7089	1686.34	26.6102	1685.55	42.0737		0.106098		1686.83	46.6327	1657.66	1809.66		218.261	13.7534	1422.01	740136	3.28723	0.0246815	14.6754	0.281493	5.79481	10.748	1.81844
OC18/04 XS 37 7/12/2020 3:27:02 PM (Run: 1)		193.776	102.935	73.5057	0.531205	1876.99		0.100239	1.86443	9.6049	1.57345	4.23513	3.7909	0.295025	3.44894	0.907062	3.38955	3.44894	0.104114	1.57345	3.27679e-16		1930.82	34.3328	1698.7	28.9903	1680.86	31.1395	1666.59	50.6506		1.89005		1681.8	55.8972	1650.2	889.847		168.018	8.26318	841.722	703283	2.67915		13.7087	0.042632	1.25943	3.21886	0.350604
OC18/04 XS 40 7/12/2020 3:32:53 PM (Run: 1)		139.95	54.1998	50.3302	0.38728	3.13961e+06		0.0988026	2.22213	9.64909	1.06686	4.15782	3.76092	0.290972	3.60642	0.956289	3.43676	3.60642	0.103637	1.06686	0		1904.41	40.386	1690.23	19.6777	1665.75	30.7838	1646.38	52.3997		2.59408		1666.46	57.6051	1634.86	729.382		164.45	9.44135	776.384	715497	3.10633	0.0269817	6.03501	0.0216734	0.680985	3.37149	0.212704
OC18/04 XS 38 7/12/2020 3:28:59 PM (Run: 1)		151.232	46.6977	42.9304	0.308782	19577.8		0.0818522	3.52484	11.073	1.62901	2.95135	3.1622	0.237019	2.71032	0.852933	4.21907	2.71032	0.09031	1.62901	2.01301e-16		1590.18	53.9032	1432.1	31.0831	1395.19	23.9825	1371.18	33.4769		4.25381		1395.86	35.787	1363.15	301.721		146.352	8.68316	1009.64	720050	3.26501		11.5041	0.115796	3.0529	6.70496	0.362213
OC18/04 XS 47 7/12/2020 3:54:39 PM (Run: 1)		87.7948	73.4602	10.1601	0.836727	1694.99		0.0290035	4.08208	17.6923	4.48753	0.674539	5.90687	0.0865547	3.84098	0.648682	11.5534	3.84098	0.0565217	4.48753	-2.0614e-16		577.883	23.2556	472.943	99.2799	523.468	24.1601	535.129	19.7242		-13.1487		523.351	20.1866	529.37	2143.93		253.765	9.81926	1878.34	741521	16.4014	0.0894894	20.4812	0.485458	8.02248	14.7375	1.64065
OC18/04 XS 33 7/12/2020 3:19:13 PM (Run: 1)		360.616	197.972	28.1627	0.548984	800.089		0.0213326	3.09959	17.653	2.56709	0.490516	3.78038	0.0628015	2.77512	0.730682	15.9232	2.77512	0.0566477	2.56709	2.49445e-16		426.642	13.0856	477.851	56.7454	405.262	12.6323	392.64	10.571		17.8321		405.59	10.6763	389.829	681.378		1298.11	22.0235	5515.23	729165	0.828303	0.0705025	1.91791	0.555764	12.4758	26.0819	0.251751
OC18/04 XS 42 7/12/2020 3:44:56 PM (Run: 1)		406.86	82.1816	28.6998	0.20199	700.464		0.0232989	4.54483	18.4017	2.35199	0.467633	4.04365	0.0624112	3.28926	0.810754	16.0228	3.28926	0.0543427	2.35199	-2.29721e-16		465.518	20.9152	385.268	52.8355	389.553	13.0825	390.273	12.4562		-1.2989		389.693	12.6172	388.16	301.824		634.329	9.345	1798.79	722430	0.944638	0.0149959	1.47174	0.122067	2.31755	5.91657	0.155775
OC18/04 XS 45 7/12/2020 3:50:47 PM (Run: 1)		275.426	336.633	15.6452	1.22223	646.843		0.0131044	4.45601	20.1175	2.41781	0.266259	3.1403	0.0388489	2.00391	0.632451	25.7408	2.00391	0.0497079	2.41781	1.83348e-16		263.147	11.6499	181.382	56.3387	239.699	6.70475	245.694	4.83083		-35.4568		239.628	4.88846	241.843	3473.64		235.049	20.7241	4128.69	739738	8.44849	0.0693919	64.3784	0.665269	13.4572	36.8527	17.7733
OC18/04 XS 34 7/12/2020 3:21:10 PM (Run: 1)		816.574	1007.78	44.0063	1.23416	1449.95		0.0127456	2.2796	18.8876	3.16439	0.264433	3.63239	0.0362236	1.78351	0.485491	27.6063	1.78351	0.0529447	3.16439	1.57456e-16		255.988	5.79872	326.458	71.8272	238.233	7.71333	229.383	4.01914		29.736		238.503	4.05759	223.485	3383.33		117.392	14.8705	730.4	713937	2.66641	0.168762	38.601	0.874037	7.99327	9.65341	2.11772
OC18/04 XS 46 7/12/2020 3:52:43 PM (Run: 1)		321.193	441.985	17.7602	1.37607	242.599		0.0124518	3.12403	17.6549	5.44771	0.281987	6.3495	0.0361071	3.26169	0.511968	27.6954	3.26169	0.0566415	5.44771	0		250.123	7.76577	477.62	120.425	252.232	14.1813	228.658	7.32739		52.1256		252.699	7.35359	223.135	3996.43		264.813	10.938	2154.29	735060	8.08265	0.147034	52.4221	0.184905	2.80075	8.05223	3.30826
OC18/04 XS 43 7/12/2020 3:46:53 PM (Run: 1)		393.864	600.176	22.3078	1.52382	2242.67		0.0124502	4.20548	19.6105	2.19542	0.25192	4.23016	0.0358302	3.61585	0.852444	27.9094	3.61585	0.0509932	2.19542	-4.47649e-16		250.092	10.4528	240.536	50.6084	228.135	8.64318	226.935	8.06288		5.65447		228.207	8.11467	220.146	4948.5		212.372	6.78178	1533.6	737819	7.57372	0.000712787	52.7971	0.152236	4.09764	7.56524	3.00106
OC18/04 XS 36 7/12/2020 3:25:04 PM (Run: 1)		242.696	137.217	10.7902	0.565386	144.787		0.0130636	6.08717	19.0645	3.83456	0.254728	5.73627	0.0352209	4.26626	0.742274	28.3923	4.26626	0.0524536	3.83456	0		262.334	15.8655	305.246	87.37	230.41	11.8246	223.141	9.35691		26.8978		230.572	9.4015	219.542	1300.45		167.454	7.34886	785.541	706227	1.52242		16.4629	0.0622999	1.54877	3.89964	1.29018
OC18/04 XS 39 7/12/2020 3:30:56 PM (Run: 1)		544.319	694.857	27.0506	1.27656	672.105		0.0118458	2.53058	18.8636	2.27503	0.239919	4.12714	0.0328237	3.44347	0.831837	30.4658	3.44347	0.0530122	2.27503	4.53639e-16		238.022	5.98799	329.34	51.6137	218.354	8.10867	208.197	7.05466		36.7837		218.602	7.06966	201.187	3571.37		243.661	6.35047	1751.13	705371	8.12951	0.217714	63.4412	0.160106	3.44363	8.02473	2.5444
OC18/04 XS 35 7/12/2020 3:23:07 PM (Run: 1)	z1	257.965	251.468	11.8758	0.974814	253.162		0.0119505	3.47746	20.1678	4.97679	0.223955	6.22381	0.0327579	3.73729	0.598948	30.5269	3.73729	0.0495841	4.97679	3.82072e-16		240.114	8.30047	175.552	116.092	205.196	11.5633	207.786	7.64176		-18.3615		205.174	7.71942	202.265	2661.92		185.731	8.07958	1119.13	702664	4.17141	0.00839909	33.6986	0.0726173	1.73157	3.51782	1.14498
Experiment on July 12, 2020
Isotope ratio and date errors do not include systematic calibration errors of 0.26% (207Pb/206Pb) and 0.76% (206Pb/238U) (2 sigma).
Trace element concentrations were deleted from analyses known to have intersected inclusions of other minerals based on P and Ti.
Ablation used a laser spot size of 25 microns and a laser firing repetition rate of 5 Hz.
Activity of TiO2 for Ti-in-Zircon temperature calculation is 0.8.
OC18/06 XS 101 7/12/2020 6:28:37 PM (Run: 1)		276.492	228.69	125.821	0.827112	5906.11		0.0996432	3.74275	9.25023	1.06129	5.00486	3.95405	0.335771	3.80896	0.96092	2.97822	3.80896	0.108105	1.06129	4.40111e-16		1919.87	68.5487	1767.74	19.3853	1820.14	33.4627	1866.29	61.7213		-5.57517		1821.22	70.2261	1863.4	1247.5		201.936	12.1236	2013.45	788638	1.55143	0.0450184	10.1879	0.521132	8.31691	16.8118	1.99512
OC18/06 XS 79 7/12/2020 5:21:13 PM (Run: 1)		127.716	65.4701	49.1545	0.512621	4791.1		0.106633	3.02883	9.71403	1.43734	4.24667	4.06878	0.29919	3.80644	0.933213	3.34236	3.80644	0.102944	1.43734	0		2047.94	58.9896	1677.87	26.5522	1683.09	33.4394	1687.29	56.5082		-0.561353		1683.62	62.6054	1664.66	952.491		186.352	12.3116	649.301	702463	2.9403		13.6441	0.0544216	1.39406	3.10929	0.419236
OC18/06 XS 88 7/12/2020 5:46:57 PM (Run: 1)		177.091	102.213	67.0574	0.577177	1917.76		0.0996655	2.94555	9.75552	1.13943	4.11316	3.5067	0.291021	3.31642	0.942656	3.43618	3.31642	0.102506	1.13943	-4.70495e-16		1920.28	53.9589	1669.98	21.0703	1656.92	28.6427	1646.63	48.1924		1.39827		1657.69	53.0437	1627.5	1143.95		181.75	12.3502	838.357	747352	3.11033		14.7583	0.0823396	1.13418	2.68381	0.356302
OC18/06 S 75 7/12/2020 5:13:20 PM (Run: 1)		186.411	103.249	67.1089	0.55388	3114.39		0.0726333	2.54878	9.77846	1.15144	4.08683	2.90034	0.289839	2.66198	0.913182	3.4502	2.66198	0.102266	1.15144	-2.90038e-16		1417.21	34.8842	1665.64	21.3042	1651.68	23.6602	1640.72	38.5606		1.49571		1652.49	42.4302	1657.96	1016.61		173.401	14.4271	272.591	950865	1.32897	0.0065769	6.88252	0.048547	1.52174	6.44666	0.384262
OC18/06 S 56 7/12/2020 4:20:14 PM (Run: 1)		271.995	182.129	99.1068	0.669603	3307.44		0.0731902	1.9585	9.57947	1.16554	4.10413	2.86475	0.285142	2.61692	0.908725	3.50703	2.61692	0.10439	1.16554	0		1427.7	26.9968	1703.61	21.4611	1655.12	23.3892	1617.21	37.4299		5.07161		1656.5	40.9577	1635.96	1184.6		171.641	9.62834	905.23	884881	3.54817		12.0554	0.04647	0.879676	2.01043	0.295605
OC18/06 S 69 7/12/2020 4:53:36 PM (Run: 1)		108.813	217.121	49.7844	1.99536	903.352		0.0724146	2.79473	9.58621	1.67191	4.0749	5.69458	0.283311	5.44361	0.954775	3.52969	5.44361	0.104317	1.67191	0		1413.09	38.1431	1702.3	30.7901	1649.29	46.4281	1608.01	77.4705		5.53862		1649.95	84.5821	1670.16	2625.76		267.409	17.6244	761.02	903712	1.64579	0.0347671	7.34945	0.0474953	1.77315	4.40199	0.238551
OC18/06 XS 92 7/12/2020 6:02:54 PM (Run: 1)		196.51	72.169	62.6586	0.367253	1587.5		0.0863307	3.44341	9.94314	1.32059	3.61512	3.07031	0.260702	2.7718	0.898558	3.83579	2.7718	0.100572	1.32059	2.42838e-16		1673.68	55.3102	1634.7	24.5307	1552.86	24.4204	1493.43	36.9498		8.64142		1553.85	39.7742	1485.98	702.186		177.493	14.1158	359.948	783013	1.7673	0.0196953	7.34529	0.0336585	1.22495	3.14838	0.139788
OC18/06 S 67 7/12/2020 4:49:42 PM (Run: 1)		26.5965	33.8809	9.43655	1.27389	750.291		0.0625475	5.02827	11.0529	2.60486	3.14702	4.01913	0.252274	3.06073	0.758634	3.96394	3.06073	0.0904743	2.60486	-4.45649e-16		1226.26	59.8263	1435.56	49.6801	1444.27	30.9688	1450.19	39.7481		-1.01943		1444.31	43.0671	1491.94	2675.2		211.962	26.5856	1775.58	882366	1.66416	0.00947438	3.45712	0.381015	6.63599	12.463	2.04045
OC18/06 S 71 7/12/2020 5:05:31 PM (Run: 1)		117.931	37.6742	33.7278	0.31946	1136.28		0.0603194	4.07115	11.2672	1.72002	2.99647	3.0741	0.244863	2.54787	0.82425	4.08391	2.54787	0.0887533	1.72002	0		1183.83	46.8112	1398.85	32.9691	1406.72	23.4035	1411.93	32.3071		-0.93489		1407.06	34.8216	1421.98	342.783		124.111	8.59044	769.188	924244	5.21089	0.024084	9.65723	0.0328848	1.09777	2.73358	0.252496
OC18/06 XS 78 7/12/2020 5:19:16 PM (Run: 1)		185.826	95.7194	57.6523	0.515102	1884.84		0.0876802	2.59983	10.7394	1.66682	3.11114	3.87342	0.242325	3.49644	0.900032	4.12669	3.49644	0.0931151	1.66682	1.52513e-16		1698.77	42.3602	1490.23	31.5556	1435.45	29.7633	1398.77	43.965		6.13737		1436.25	47.0049	1378.94	1044.87		291.654	10.7366	1015.79	731113	6.26766	0.500649	20.3561	0.196489	1.92204	3.71386	0.365531
OC18/06 S 70 7/12/2020 4:55:33 PM (Run: 1)		127.431	103.218	39.4256	0.809994	2311.66		0.0593564	2.51873	11.1739	2.10385	2.958	3.26951	0.239718	2.50271	0.761097	4.17156	2.50271	0.0894944	2.10385	0		1165.46	28.5246	1414.76	40.2387	1396.9	24.8105	1385.23	31.1966		2.08712		1397.38	33.5123	1410.59	1759.72		230.635	15.8326	1577.94	934514	3.93414	0.0357932	13.7576	0.0844972	2.92277	7.12712	0.725232
OC18/06 S 64 7/12/2020 4:43:51 PM (Run: 1)		27.8439	29.0215	7.55562	1.04229	3742.05		0.0528656	5.22682	13.4339	4.47991	2.06562	5.51224	0.201257	3.21173	0.580635	4.96878	3.21173	0.0744388	4.47991	-2.46937e-16		1041.24	53.0458	1053.39	90.2471	1137.48	37.7129	1182.07	34.6874		-12.2158		1137.15	37.1073	1204.02	2261.01		162.947	20.0195	823.238	883277	2.04735		7.22931	0.141046	2.55448	4.72274	0.67443
OC18/06 XS 95 7/12/2020 6:08:45 PM (Run: 1)		110.286	57.9635	26.337	0.525575	1852.63		0.0594246	4.06462	12.8304	2.28041	2.06871	4.46064	0.192504	3.83367	0.857345	5.1947	3.83367	0.0779397	2.28041	-2.03256e-16		1166.76	46.0817	1145.35	45.3147	1138.5	30.5331	1134.92	39.8944		0.909883		1138.76	41.9514	1132.94	1079.63		154.549	6.5942	530.023	777958	3.69976		9.97881	0.00928146	0.679227	1.54949	0.066219
OC18/06 XS 90 7/12/2020 5:50:52 PM (Run: 1)		88.2154	41.9196	20.6092	0.475196	2757.4		0.0627464	3.89979	12.8223	2.03272	2.03247	4.10867	0.189012	3.57061	0.866598	5.29068	3.57061	0.077989	2.03272	0		1230.04	46.5386	1146.57	40.386	1126.44	27.9614	1116.02	36.59		2.66467		1126.71	38.3762	1108.72	999.227		153.6	7.67552	731.672	758999	3.70282	0.00449164	6.46678	0.0739495	2.36179	4.41951	0.380971
OC18/06 S 68 7/12/2020 4:51:39 PM (Run: 1)		123.425	69.0298	27.9336	0.559284	3404.92		0.0491293	3.83314	13.4627	2.03233	1.89494	3.62887	0.185023	3.00638	0.825184	5.40475	3.00638	0.0742795	2.03233	0		969.386	36.2809	1049.08	40.9673	1079.32	24.1189	1094.35	30.2594		-4.31577		1079.43	31.8398	1104.64	695.952		183.102	9.70449	1193.82	907950	4.31088		8.97797	0.0432665	0.872619	3.06711	0.127824
OC18/06 S 58 7/12/2020 4:24:08 PM (Run: 1)		21.8552	15.1641	5.08885	0.693843	1630.59		0.0500823	7.5349	12.7373	5.82522	1.98814	6.88565	0.183663	3.67138	0.531779	5.44474	3.67138	0.0785096	5.82522	-3.32256e-16		987.738	72.6358	1159.8	115.51	1111.49	46.518	1086.96	36.7233		6.28045		1111.74	38.713	1096.95	1490.11		53.6784	14.806	572.293	884707	1.55793		3.80749	0.0596833	1.16971	3.01712	0.368303
OC18/06 XS 80 7/12/2020 5:23:10 PM (Run: 1)		351.181	106.699	24.322	0.303828	782.681		0.0223874	4.10274	18.3079	2.86419	0.445847	4.04598	0.0592003	2.85768	0.703206	16.8918	2.85768	0.0546211	2.86419	2.17103e-16		447.507	18.1583	396.738	64.2121	374.367	12.6683	370.76	10.2962		6.54786		374.534	10.4205	367.303	770.469		453.51	12.8231	1412.49	707034	1.34155	0.0409643	2.18088	0.104798	2.22312	5.60021	0.643177
OC18/06 S 66 7/12/2020 4:47:45 PM (Run: 1)		326.976	348.197	18.4431	1.0649	6204.34		0.0118799	3.54979	19.5102	2.68382	0.294073	4.14645	0.0416118	3.16072	0.759543	24.0317	3.16072	0.0512552	2.68382	0		238.703	8.42363	252.351	61.7343	261.761	9.5676	262.816	8.13981		-4.14695		261.791	8.21437	267.426	2889.56		191.332	13.904	1947.63	908805	3.69667		29.7958	0.154017	2.56116	4.79762	2.05728
OC18/06 S 60 7/12/2020 4:28:03 PM (Run: 1)		356.155	654.885	22.9567	1.83876	377.617		0.0116806	2.96924	19.4137	2.80217	0.290224	4.31307	0.0408639	3.27878	0.757669	24.4715	3.27878	0.0515101	2.80217	-1.93388e-16		234.721	6.92912	263.746	64.3243	258.735	9.85108	258.185	8.29804		2.1082		258.801	8.36809	267.124	5765.48		182.153	16.1944	2039.01	889884	2.40509	0.0461485	27.3007	0.472397	9.12713	12.768	2.74853
OC18/06 S 62 7/12/2020 4:39:57 PM (Run: 1)		138.066	154.027	7.47695	1.1156	264.705		0.0115259	4.16445	19.4069	5.85638	0.279	6.83865	0.0392698	3.53128	0.51489	25.4649	3.53128	0.0515281	5.85638	0		231.632	9.59113	264.566	134.413	249.864	15.1472	248.305	8.60163		6.14628		249.91	8.70446	251.66	1560.6		85.795	5.92331	1690.48	887032	4.18489	0.00868108	57.407	0.101648	1.60045	3.7172	1.7704
OC18/06 S 73 7/12/2020 5:09:26 PM (Run: 1)		224.419	210.99	11.3109	0.94016	4763.6		0.010633	3.9182	20.3154	4.24979	0.261321	4.90172	0.0385033	2.44255	0.495317	25.9718	2.44255	0.0492238	4.24979	0		213.781	8.33222	158.53	99.4435	235.731	10.3116	243.549	5.83784		-53.63		235.616	5.92849	248.447	2438.57		141.05	4.04573	906.118	937980	2.64161	0.0255256	22.2876	0.0205932	0.745286	2.08674	0.86118
OC18/06 XS 97 7/12/2020 6:12:40 PM (Run: 1)		211.303	257	11.6911	1.21626	326.234		0.0122883	3.51794	19.836	3.66999	0.267197	5.30596	0.0384402	3.83202	0.720445	26.0144	3.83202	0.0504133	3.66999	1.26326e-16		246.858	8.63151	214.065	85.0091	240.45	11.3601	243.157	9.14429		-13.5904		240.428	9.23179	242.37	3099.52		236.568	9.17546	1816.9	797895	6.14752		42.2423	0.135303	2.65093	6.58331	2.62623
OC18/06 XS 86 7/12/2020 5:43:03 PM (Run: 1)		97.3573	62.2656	4.65085	0.639558	111.048		0.0121109	6.5075	19.3317	5.45586	0.271421	6.65316	0.038055	3.80765	0.570892	26.2778	3.80765	0.0517286	5.45586	3.4205e-16		243.317	15.7389	273.455	125.021	243.829	14.4216	240.766	8.99842		11.9543		243.894	9.08566	240.507	1625.1		153.591	8.28459	607.13	747713	2.29282		18.4235	0.0246456	0.436682	1.99704	0.815
OC18/06 XS 82 7/12/2020 5:35:14 PM (Run: 1)		195.197	184.715	10.3308	0.946302	4467.92		0.0139646	3.45838	19.206	5.60523	0.270942	6.98969	0.0377409	4.17577	0.596192	26.4965	4.17577	0.052067	5.60523	-3.03603e-16		280.301	9.62697	288.387	128.099	243.446	15.13	238.815	9.7899		17.1895		243.553	9.87333	231.993	2541.3
OC18/06 S 52 7/12/2020 4:12:26 PM (Run: 1)		120.172	235.814	7.09365	1.9623	118.479		0.0100476	4.641	19.6555	5.3614	0.262403	6.10002	0.0374069	2.90958	0.474965	26.7331	2.90958	0.0508763	5.3614	0		202.07	9.33134	235.236	123.709	236.601	12.8745	236.739	6.76316		-0.639042		236.612	6.85401	251.136	6691.96		264.781	19.4929	3137.42	900387	5.83982	0.0379622	41.9039	0.166327	4.07928	9.07051	4.98654
OC18/06 XS 87 7/12/2020 5:45:00 PM (Run: 1)		238.027	153.124	11.2583	0.643306	211.416		0.0125648	4.44997	19.1434	4.0906	0.26839	5.33284	0.0372634	3.42143	0.639612	26.836	3.42143	0.0522375	4.0906	0		252.379	11.1609	295.779	93.3639	241.406	11.4578	235.848	7.92354		20.2622		241.535	7.98113	234.12	1645.72		99.812	4.49682	357.619	743313	1.64522	0.0781327	17.5277	0.0243038		0.890885	0.317151
OC18/06 S 61 7/12/2020 4:38:00 PM (Run: 1)		84.0576	101.283	4.29584	1.20493	60.036		0.0101913	7.71736	19.0173	7.05047	0.267425	8.10866	0.036885	4.00516	0.492836	27.1113	4.00516	0.0525836	7.05047	-2.51634e-16		204.946	15.7365	310.89	160.481	240.633	17.3724	233.496	9.18456		24.8944		240.77	9.27838	239.781	2413.41		242.655	10.2073	1859.34	895303	2.02153	0.0418929	16.3078	0.165303	2.94321	6.80513	3.26486
OC18/06 XS 96 7/12/2020 6:10:43 PM (Run: 1)		215.94	268.566	11.5051	1.2437	399.908		0.0117563	4.54913	19.5826	3.34989	0.258931	4.76056	0.0367751	3.38248	0.708293	27.1923	3.38248	0.0510656	3.34989	-3.13578e-16		236.235	10.6841	243.75	77.1778	233.805	9.94191	232.812	7.73433		4.48736		233.847	7.79588	232.062	3243.34
OC18/06 XS 84 7/12/2020 5:39:08 PM (Run: 1)		202.977	149.341	9.89067	0.735754	2257.07		0.0142932	6.54717	19.4048	4.55928	0.258176	5.44981	0.0363349	2.98553	0.545621	27.5217	2.98553	0.0515336	4.55928	1.30515e-16		286.852	18.648	264.745	104.642	233.196	11.355	230.075	6.74783		13.0957		233.276	6.81438	223.059	1953.36		84.5426	5.1876	422.174	734153	2.11047	0.0117329	19.4194	0.0305002	0.359251	1.44822	0.426437
OC18/06 XS 77 7/12/2020 5:17:19 PM (Run: 1)		170.311	227.303	9.36616	1.33463	149.834		0.012643	4.26109	19.9901	3.93617	0.250387	4.69861	0.0363016	2.56582	0.543112	27.547	2.56582	0.0500247	3.93617	1.75899e-16		253.94	10.7529	196.129	91.473	226.89	9.55357	229.868	5.79407		-17.2022		226.851	5.86426	223.869	3327.55		230.262	15.7988	1615.44	732985	2.18201	0.0419845	25.2687	0.299222	6.54739	10.9053	3.47946
OC18/06 XS 81 7/12/2020 5:33:17 PM (Run: 1)		311.186	129.613	13.6597	0.416511	625.52		0.0139905	5.42354	19.6457	3.62304	0.254191	4.70947	0.0362183	3.00877	0.636349	27.6104	3.00877	0.0509016	3.62304	0		280.819	15.125	236.376	83.5809	229.975	9.69167	229.349	6.77929		2.97253		230.021	6.83992	225.96	529.672		150.094	2.79276	727.684	726765	2.19437	0.0147542	14.6632	0.0538304	1.14338	1.78243	1.03645
OC18/06 XS 89 7/12/2020 5:48:54 PM (Run: 1)		599.327	349.089	27.0704	0.582469	8192.79		0.0129195	3.85576	18.8762	2.11263	0.261034	3.72655	0.0357364	3.06984	0.820644	27.9827	3.06984	0.0529768	2.11263	1.36997e-16		259.458	9.94017	327.82	47.9425	235.5	7.83262	226.351	6.82804		30.9528		235.74	6.85127	223.267	775.963		257.747	3.75495	1483.38	749472	5.1583	0.00892394	13.9575	0.104	2.23896	5.10064	1.33529
OC18/06 XS 85 7/12/2020 5:41:05 PM (Run: 1)		359.96	140.013	15.181	0.388969	502.622		0.0131825	5.18006	19.0584	3.1985	0.254604	4.54749	0.0351925	3.23253	0.708401	28.4151	3.23253	0.0524704	3.1985	1.71842e-16		264.705	13.6225	305.96	72.8685	230.309	9.37045	222.965	7.08418		27.1261		230.486	7.12031	220.424	949.876		160.597	3.9611	852.021	726924	2.22115	0.0366162	18.599	0.0493555	1.04487	2.5238	1.06716
OC18/06 S 51 7/12/2020 4:10:28 PM (Run: 1)		381.923	215.597	16.2657	0.564503	918.283		0.00980955	3.45877	18.8097	2.69072	0.257825	3.56514	0.0351726	2.33885	0.651751	28.4312	2.33885	0.0531641	2.69072	1.41167e-16		197.306	6.79115	335.804	60.9751	232.912	7.42011	222.841	5.12287		33.6396		233.145	5.14738	225.256	960.549		189.149	3.64478	1045.62	896273	1.37165		6.90302	0.086607	2.04023	3.22791	1.12901
OC18/06 S 59 7/12/2020 4:26:06 PM (Run: 1)		225.064	380.881	11.8803	1.69232	115.694		0.00984835	3.07096	19.7972	3.35455	0.239434	4.61197	0.0343786	3.16501	0.683812	29.0878	3.16501	0.0505122	3.35455	0		198.083	6.05333	218.651	77.6359	217.957	9.04646	217.894	6.78114		0.346061		217.983	6.83625	224.664	5384.71		301.287	5.82013	3598.2	880936	3.21889	0.042957	65.6336	0.385383	9.05231	17.9729	5.55301
OC18/06 S 76 7/12/2020 5:15:17 PM (Run: 1)		172.651	143.936	7.56464	0.833683	3556.93		0.00924783	5.74914	19.3232	4.96666	0.244928	5.76185	0.0343254	2.92083	0.504798	29.1329	2.92083	0.0517513	4.96666	2.44921e-16		186.059	10.6477	274.428	113.793	222.448	11.5103	217.563	6.2486		20.7212		222.554	6.31056	222.082	2006.77		173.662	7.29724	857.267	956884	1.83981		16.6077	0.050453	0.96552	2.00175	0.606882
OC18/06 S 57 7/12/2020 4:22:11 PM (Run: 1)		576.707	247.474	23.1789	0.429115	2462.45		0.00995504	4.86841	19.9165	3.45249	0.2367	4.85309	0.0341909	3.41069	0.700629	29.2476	3.41069	0.0502095	3.45249	-4.52716e-16		200.218	9.6993	204.698	80.1069	215.715	9.43153	216.724	7.26893		-5.87525		215.762	7.32943	217.938	924.304		204.134	8.1712	4462.16	887256	5.54171	0.0815254	18.055	0.14547	2.55442	8.9639	4.82044
OC18/06 XS 93 7/12/2020 6:04:51 PM (Run: 1)		295.919	502.067	16.1275	1.69664	4237.14		0.0111403	3.44676	19.2687	3.42449	0.242131	4.78069	0.0338378	3.33585	0.695526	29.5528	3.33585	0.0518977	3.42449	3.1104e-16		223.925	7.67557	280.927	78.3669	220.164	9.46246	214.523	7.03841		23.6373		220.295	7.07793	211.346	1963.1		409.681
OC18/06 S 50 7/12/2020 4:00:32 PM (Run: 1)		174.262	189.197	7.95748	1.0857	149.312		0.00960521	6.14925	20.4685	5.60134	0.226276	6.30627	0.0335911	2.89723	0.457466	29.7698	2.89723	0.0488555	5.60134	0		193.215	11.8247	140.937	131.495	207.12	11.8155	212.985	6.06984		-51.121		207.028	6.16266	216.854	3231.22		447.548
OC18/06 S 54 7/12/2020 4:16:20 PM (Run: 1)		539.866	902.256	27.2572	1.67126	1130.33		0.00914275	2.91317	19.4367	2.61147	0.237467	3.97806	0.0334753	3.00087	0.751361	29.8728	3.00087	0.0514489	2.61147	0		183.955	5.3346	260.983	59.9776	216.344	7.75123	212.263	6.26599		18.6681		216.481	6.30072	221.819	5125.37		422.233	11.7042	3661.97	897410	8.13683	0.00416615	56.4362	0.241992	5.34225	11.1661	1.29444
OC18/06 S 63 7/12/2020 4:41:54 PM (Run: 1)		465.858	531.506	21.5402	1.14092	780.894		0.0097792	3.45034	18.7587	3.6603	0.244738	4.22602	0.0332968	2.11222	0.495807	30.0329	2.11222	0.0533087	3.6603	-2.29817e-16		196.698	6.75385	341.998	82.8542	222.293	8.43694	211.149	4.38767		38.2601		222.547	4.42108	214.196	1885.09		188.74	12.4581	3398.94	884181	3.76276	0.0950419	18.7087	0.708058	12.5159	21.1717	4.99424
OC18/06 XS 99 7/12/2020 6:16:34 PM (Run: 1)		707.867	536.885	30.2234	0.758455	611.399		0.0106634	2.79162	19.3192	3.08235	0.234757	4.64243	0.0328933	3.4715	0.745548	30.4013	3.4715	0.0517619	3.08235	0		214.389	5.9533	274.944	70.6128	214.118	8.96217	208.631	7.12668		24.1186		214.291	7.1615	207.976	2095.9		383.792	8.06677	2829.83	814911	8.08733		21.094	0.265189	5.41863	12.4177	3.26131
OC18/06 XS 94 7/12/2020 6:06:48 PM (Run: 1)		571.65	386.935	23.9306	0.676873	5767.03		0.0109351	2.85192	19.6401	1.93708	0.230141	3.95379	0.0327821	3.44676	0.869128	30.5044	3.44676	0.0509161	1.93708	2.66127e-16		219.822	6.23517	237.022	44.6821	210.315	7.51074	207.937	7.05275		12.2708		210.411	7.08941	206.653	1746.68		210.106	4.34057	3698.54	792407	1.89692	0.0377148	11.8139	0.587775	14.3097	23.1438	7.20484
OC18/06 XS 83 7/12/2020 5:37:11 PM (Run: 1)		133.258	183.742	6.79888	1.37885	105.785		0.0121018	4.10094	20.3689	6.25662	0.221523	7.11635	0.0327254	3.39075	0.474988	30.5573	3.39075	0.0490945	6.25662	3.3495e-16		243.134	9.91105	152.369	146.569	203.177	13.104	207.583	6.9265		-36.2371		203.105	7.02331	198.292	2741		382.989	9.30471	1867.98	737949	6.06024		55.9068	0.176465	2.68496	7.26064	2.50568
OC18/06 XS 91 7/12/2020 6:00:57 PM (Run: 1)	z4	374.213	141.253	14.3394	0.377466	388.544		0.0115689	5.77371	20.1546	3.44172	0.221251	4.92913	0.0323412	3.52858	0.7138	30.9203	3.52858	0.0496166	3.44172	-2.92592e-16		232.491	13.3464	177.104	80.26	202.95	9.06734	205.185	7.1261		-15.8555		202.941	7.18558	203.579	925.706		220.684	5.41548	993.728	777558	3.0038		8.76752	0.0494713	0.600026	2.65435	0.835198
OC18/06 S 48 7/12/2020 3:56:39 PM (Run: 1)	z1	195.829	175.571	8.02452	0.896554	471.04		0.00884404	5.85635	20.4461	5.14113	0.212451	5.7527	0.0315041	2.58116	0.446281	31.7419	2.58116	0.0489091	5.14113	2.67748e-16		177.971	10.3769	143.479	120.636	195.607	10.2352	199.955	5.08193		-39.3619		195.541	5.15707	203.399	2394.51		93.9347	3.75939	825.198	918465	1.78595		21.5581	0.0459867	0.552305	1.65382	0.684818
OC18/06 XS 98 7/12/2020 6:14:37 PM (Run: 1)	z5	370.182	797.284	20.1103	2.15376	218.076		0.00991025	2.75007	18.8337	4.15861	0.229236	4.97078	0.0313125	2.72299	0.545146	31.9361	2.72299	0.0530962	4.15861	0		199.321	5.45453	332.933	94.2865	209.568	9.41244	198.757	5.32956		40.301		209.802	5.3597	198.539	3621.66		550.636	7.89698	4265.05	792708	5.46713		60.2927	0.192529	5.72016	16.2674	5.82336
OC18/06 S 53 7/12/2020 4:14:23 PM (Run: 1)	z2	182.376	166.04	7.3173	0.910431	126.668		0.0084225	7.33105	20.3311	7.35521	0.209759	7.67828	0.0309299	2.20383	0.28491	32.3311	2.20383	0.0491858	7.35521	2.19192e-16		169.524	12.3759	156.737	172.165	193.35	13.5181	196.366	4.26232		-25.2836		193.309	4.38046	200.642	2517.37		205.27	10.271	2188.03	898575	1.71729		7.78978	0.185746	3.86469	7.33923	1.69574
OC18/06 S 65 7/12/2020 4:45:48 PM (Run: 1)	z3	746.033	828.553	31.7182	1.11061	405.973		0.0089456	2.68683	18.7392	3.06995	0.227494	4.04935	0.0309186	2.64057	0.648754	32.343	2.64057	0.0533641	3.06995	2.19211e-16		180.006	4.81497	344.282	69.4653	208.128	7.6202	196.295	5.10519		42.9842		208.418	5.12012	199.648	3068.77
Experiment on July 12, 2020
Isotope ratio and date errors do not include systematic calibration errors of 0.26% (207Pb/206Pb) and 0.76% (206Pb/238U) (2 sigma).
Trace element concentrations were deleted from analyses known to have intersected inclusions of other minerals based on P and Ti.
Ablation used a laser spot size of 25 microns and a laser firing repetition rate of 5 Hz.
Activity of TiO2 for Ti-in-Zircon temperature calculation is 0.8.
WS14/02_M58 7/10/2020 11:40:38 PM (Run: 1)		245.205	132.198	94.9162	0.539132	2046.23		0.102329	1.55088	9.41389	1.39317	4.32428	2.33578	0.295244	1.87481	0.79644	3.38703	1.87481	0.106226	1.39317	1.72789e-16		1969.18	29.0991	1735.62	25.5497	1698	19.2626	1667.68	27.549		3.91408		1711.43	30.4502	1672.36	508.07		275.691	12.463	855.765	769090	1.4		9.37522	0.0546591	1.67962	4.44046	0.70015
WS14/02_L44 7/10/2020 10:58:54 PM (Run: 1)		168.141	98.7309	66.5633	0.587192	1771.57		0.0917272	1.34241	9.44106	1.55503	4.4997	3.64225	0.308108	3.29361	0.902011	3.24561	3.29361	0.10592	1.55503	0		1773.84	22.7972	1730.33	28.537	1730.92	30.2583	1731.39	50.0092		-0.0612518		1734	55.7295	1734.32	1152.76		203.331	9.49494	861.744	875343	1.43227		8.78075	0.0343946	1.38143	2.79761	0.631654
WS14/02_M61 7/10/2020 11:46:29 PM (Run: 1)		252.241	150.06	98.8805	0.594909	13601.6		0.101142	2.75149	9.68248	1.62136	4.21392	2.85855	0.295918	2.35425	0.81954	3.37931	2.35425	0.103279	1.62136	0		1947.39	51.0821	1683.86	29.9292	1676.73	23.4583	1671.04	34.6549		0.761534		1690.09	38.3843	1675.8	1100.72		259.822	11.4528	1003.48	802777	5.48874	0.0237811	20.0918	0.0492062	1.9182	4.86633	0.419675
WS14/02_L34 7/10/2020 10:31:14 PM (Run: 1)		122.588	89.6603	47.9976	0.731395	1121.41		0.0928139	3.1721	9.7487	2.00153	4.17496	3.64871	0.295187	3.05073	0.833666	3.38768	3.05073	0.102578	2.00153	2.89292e-16		1793.95	54.4536	1671.28	37.0058	1669.12	29.8892	1667.4	44.8216		0.232229		1664.57	49.6021	1646.22	1345.16		273.554	19.8181	908.233	855332	3.78719		15.312	0.0517782	1.9931	4.38839	0.706993
WS14/02_M65 7/10/2020 11:54:18 PM (Run: 1)		142.038	102.097	57.7299	0.718802	2275.67		0.104129	2.85803	9.76848	0.810194	4.24601	3.16407	0.30082	3.05858	0.963849	3.32425	3.05858	0.10237	0.810194	-3.58393e-16		2002.16	54.4793	1667.53	14.9867	1682.96	26.0033	1695.37	45.5961		-1.66975		1682.84	50.5808	1666.3	940.307		260.337	13.2297	1494.31	787199	3.03018	0.0178209	14.0803	0.193859	5.42324	9.49761	1.34745
WS14/02_M67 7/11/2020 12:06:18 AM (Run: 1)		456.124	54.5098	132.036	0.119507	1859.42		0.0867205	5.19325	10.0543	0.988486	3.33566	4.42998	0.243238	4.31828	0.973365	4.11119	4.31828	0.0994599	0.988486	0		1680.93	83.7637	1614	18.411	1489.44	34.6065	1403.51	54.4637		13.0413		1523.39	57.8061	1455	239.893		249.285	11.5342	412.07	807288	1.63586		5.29494	0.0507917	0.78318	2.68119	0.515743
WS14/02_S79 7/11/2020 12:37:47 AM (Run: 1)		101.092	116.206	34.2704	1.14951	2507.99		0.0610876	3.65731	11.0693	2.29525	3.10487	3.37952	0.249265	2.48052	0.730735	4.01179	2.48052	0.09034	2.29525	0		1198.47	42.5574	1432.73	43.7919	1433.9	25.9554	1434.69	31.9057		-0.136865		1425.41	34.5208	1457.23	2540.72		248.975	20.7728	1373	1.04353e+06	2.01697		13.2164	0.0665372	1.46945	3.60739	0.304622
WS14/02_S75 7/11/2020 12:21:57 AM (Run: 1)		23.051	25.8015	5.79755	1.11932	596.31		0.0445875	7.46277	12.1055	3.57136	2.16795	4.40765	0.19034	2.58318	0.583674	5.25375	2.58318	0.082607	3.57136	0		881.696	64.3844	1259.95	69.7999	1170.82	30.6273	1123.22	26.6276		10.8523		1156.12	27.9906	1138.25	2748.71		198.515	28.2038	681.952	1.03328e+06	2.80819		4.17727	0.0439327	1.407	3.52	0.505948
WS14/02_S76 7/11/2020 12:23:55 AM (Run: 1)		121.866	88.7376	29.3166	0.728157	2334.99		0.0512113	2.31311	12.5094	2.57136	2.10075	3.7521	0.190594	2.73246	0.725592	5.24674	2.73246	0.0799397	2.57136	0		1009.46	22.7764	1195.48	50.7245	1149.05	25.8114	1124.59	28.198		5.9294		1140.72	29.6069	1122.51	907.761
WS14/02_L38 7/10/2020 10:47:11 PM (Run: 1)		34.6058	25.3905	8.77746	0.733706	231.884		0.0611384	6.28139	12.5877	3.88548	2.16294	5.95316	0.197465	4.51034	0.756624	5.06419	4.51034	0.0794427	3.88548	0		1199.43	73.1493	1183.19	76.7839	1169.22	41.3363	1161.69	47.9463		1.81702		1155.01	50.5944	1133.55	1651.58		216.908	17.9067	733.879	864429	3.41258		4.98972	0.0557817	1.19799	3.799	0.264752
WS14/02_M64 7/10/2020 11:52:20 PM (Run: 1)		130.768	45.9783	28.0991	0.351602	11511.1		0.0643059	3.49417	13.1424	2.6524	1.89535	4.00571	0.180661	3.00175	0.747105	5.53524	3.00175	0.0760894	2.6524	-2.20654e-16		1259.68	42.6718	1097.41	53.0818	1079.46	26.6255	1070.58	29.6095		2.44505		1072.23	31.0308	1049.92	384.059		181.469	10.717	525.154	776388	3.38892		5.67487	0.0354073	0.670591	2.16858	0.172769
WS14/02_M68 7/11/2020 12:08:15 AM (Run: 1)		279.866	99.4706	61.0063	0.355422	33917.8		0.06318	3.03596	13.2121	1.36002	1.8873	3.1102	0.180848	2.79709	0.896199	5.52952	2.79709	0.075688	1.36002	-2.34671e-16		1238.28	36.4654	1086.82	27.2607	1076.63	20.6428	1071.6	27.6149		1.39988		1080.05	28.8849	1068.67	465.603		252.979	11.0249	1079.61	808765	8.7566		10.8502	0.0425361	1.56585	4.52816	0.230403
WS14/02_M66 7/10/2020 11:56:15 PM (Run: 1)		274.261	90.9261	59.7864	0.331531	2558.77		0.0644501	3.75815	13.2574	1.51505	1.89096	3.49918	0.181818	3.15418	0.898942	5.49999	3.15418	0.0754298	1.51505	3.73794e-16		1262.42	45.9923	1079.97	30.3992	1077.92	23.24	1076.9	31.2818		0.284234		1081.61	32.7535	1074.18	721.897		212.127	9.17619	889.9	770988	8.53002		10.6	0.0109289	1.03588	2.65648	0.126013
WS14/02_M72 7/11/2020 12:16:03 AM (Run: 1)		271.053	72.1286	58.347	0.266105	1181.89		0.0631395	3.67986	13.2815	1.60424	1.90676	2.76835	0.183672	2.25614	0.810617	5.44449	2.25614	0.0752926	1.60424	2.46584e-16		1237.52	44.1728	1076.33	32.2062	1083.45	18.439	1087	22.5681		-0.991884		1086.63	23.6914	1086.55	541.596		179.412	6.46184	721.184	822386	9.54008		10.3696	0.0395349	0.469205	2.36119	0.0974852
WS14/02_L42 7/10/2020 10:55:00 PM (Run: 1)		346.686	128.384	76.0031	0.370319	8853.2		0.0585848	2.41429	13.5455	1.34339	1.84978	3.43677	0.181725	3.16334	0.917937	5.50282	3.16334	0.073825	1.34339	0		1150.74	27.006	1036.69	27.1305	1063.35	22.6511	1076.39	31.359		-3.82978		1071.24	32.8992	1085.34	642.97		221.533	8.77743	1067.65	859527	6.54626		13.146	0.0374493	1.2293	3.432	0.155983
WS14/02_S74 7/11/2020 12:20:00 AM (Run: 1)		147.112	86.2416	7.25807	0.586229	634.739		0.0114638	7.28127	20.2595	5.98605	0.282255	6.63252	0.0414734	2.85613	0.429187	24.1119	2.85613	0.0493595	5.98605	-4.06965e-16		230.389	16.68	164.945	139.907	252.445	14.8243	261.959	7.3319		-58.816		247.632	7.47377	259.137	1543.01		105.85	5.49134	412.033	973694	1.9676		10.1085	0.0160347	0.240388	0.953667	0.253284
WS14/02_L43 7/10/2020 10:56:57 PM (Run: 1)		242.098	109.711	10.6936	0.453167	305.4		0.01199	5.18098	19.5087	3.32744	0.26553	4.21496	0.0375699	2.58728	0.611339	26.6171	2.58728	0.0512593	3.32744	0		240.902	12.407	252.469	76.5397	239.114	8.97976	237.752	6.03927		5.82898		235.044	6.09754	232.711	1174.65		66.0746	4.34577	336.377	857854	0.616903		11.1526	0.0280863	0.438847	0.721118	0.46709
WS14/02_M47 7/10/2020 11:11:00 PM (Run: 1)		453.48	447.634	23.8421	0.987107	3851.99		0.0141955	2.60594	19.7834	2.81784	0.259662	4.36595	0.0372571	3.33486	0.761966	26.8405	3.33486	0.0505474	2.81784	-3.72491e-16		284.903	7.37234	220.258	65.1956	234.395	9.13826	235.809	7.7218		-7.06011		231.284	7.78904	223.269	2813.29		212.292	12.9806	1946.34	763058	4.99437	0.0837701	17.7163	0.414782	7.88231	14.1833	1.84463
WS14/02_L40 7/10/2020 10:51:06 PM (Run: 1)		265.849	168.969	11.9908	0.635583	254.443		0.0117291	5.07711	19.5544	4.37792	0.257406	5.68307	0.0365058	3.62369	0.636307	27.3929	3.62369	0.0511394	4.37792	0		235.692	11.8968	247.102	100.8	232.574	11.8129	231.138	8.22732		6.46064		228.68	8.3013	225.924	1530.66		68.4527	13.6665	403.722	872991	1.19529		17.0341	0.0233227	0.805727	1.24145	0.571838
WS14/02_M62 7/10/2020 11:48:26 PM (Run: 1)		305.571	395.019	16.3047	1.29272	1455.16		0.0129863	5.4739	21.2088	3.12586	0.231254	4.53099	0.0355717	3.28007	0.722088	28.1123	3.28007	0.0471502	3.12586	3.40194e-16		260.791	14.1837	56.8517	74.5415	211.233	8.641	225.325	7.26315		-296.339		207.502	7.36371	211.776	3425.38		394.982	4.51274	2296.14	791992	7.09495	0.030364	56.9833	0.0828489	3.21003	7.56557	1.44142
WS14/02_S80 7/11/2020 12:39:44 AM (Run: 1)		247.417	376.103	12.5633	1.52012	274.196		0.0092977	6.1774	19.2446	4.81299	0.254588	6.18111	0.0355342	3.87831	0.626308	28.1419	3.87831	0.0519626	4.81299	-1.86579e-16		187.058	11.502	283.741	110.088	230.296	12.736	225.092	8.57912		20.6699		226.33	8.64347	230.659	4531.63		293.317	8.65181	2789.1	1.05245e+06	2.08031	0.0293612	30.6287	0.332392	6.72912	13.0039	4.36183
WS14/02_M71 7/11/2020 12:14:06 AM (Run: 1)		134.801	92.6442	6.08955	0.687266	1597.51		0.0125912	6.13065	19.2354	4.88473	0.254264	6.04437	0.035472	3.56003	0.587718	28.1913	3.56003	0.0519874	4.88473	1.99945e-16		252.906	15.4082	284.838	111.707	230.034	12.4416	224.705	7.86174		21.1113		225.741	7.9259	216.21	1759.43		229.195	12.3639	730.476	833732	1.78407	0.0180741	16.1117	0.0423805	1.32794	2.95442	0.927629
WS14/02_M60 7/10/2020 11:44:32 PM (Run: 1)		201.548	92.072	8.64948	0.456825	192.921		0.0140063	4.54876	19.4956	3.30187	0.25069	3.98261	0.0354463	2.22685	0.556076	28.2117	2.22685	0.0512937	3.30187	2.36743e-16		281.133	12.6995	254.031	75.9293	227.136	8.1056	224.545	4.9142		11.6072		223.098	4.96237	215.62	1124.82
WS14/02_M52 7/10/2020 11:20:46 PM (Run: 1)		230.082	207.012	11.1069	0.899734	280.409		0.0131125	4.15484	19.7131	5.31907	0.247652	6.08844	0.0354076	2.96253	0.485075	28.2425	2.96253	0.0507276	5.31907	0		263.309	10.8691	228.452	122.885	224.667	12.2711	224.304	6.53081		1.8155		220.731	6.61316	213.222	2415.77		244.139	3.99435	904.458	763379	6.12846		38.8698	0.0584585	0.688285	2.6982	0.56411
WS14/02_M51 7/10/2020 11:18:49 PM (Run: 1)		192.393	133.806	8.82571	0.695485	456.815		0.0138343	6.69434	19.6501	4.83021	0.247068	5.80649	0.0352111	3.22247	0.553524	28.4002	3.22247	0.0508904	4.83021	4.47227e-16		277.704	18.4633	235.846	111.441	224.192	11.6807	223.08	7.06574		5.41259		220.127	7.13919	211.732	1817.02		152.729	7.57994	1068.18	756375	1.76943		18.8315	0.0549815	2.00348	5.31777	1.40501
WS14/02_M57 7/10/2020 11:38:41 PM (Run: 1)		299.787	251.249	14.1575	0.838091	774.864		0.0131382	3.56408	20.6925	4.11699	0.234503	4.67081	0.0351934	2.20609	0.469675	28.4144	2.20609	0.0483266	4.11699	-1.91976e-16		263.822	9.34175	115.246	97.1134	213.909	9.00905	222.971	4.83484		-93.4742		210.189	4.91393	212.464	1544.17		169.929	24.6145	841.602	767128	2.8227		9.84352	0.252829	3.38999	8.00014	0.833363
WS14/02_S73 7/11/2020 12:18:03 AM (Run: 1)		140.817	207.087	7.03681	1.47061	97.8048		0.00938124	4.98781	19.1674	5.76547	0.252728	6.1541	0.0351331	2.1523	0.347678	28.4632	2.1523	0.0521719	5.76547	0		188.731	9.36974	292.923	131.658	228.79	12.6064	222.595	4.70912		24.0092		224.516	4.79661	226.159	4450.93		203.754	4.26529	1538.26	986542	2.89059		36.0612	0.0578714	1.28756	4.57059	0.8895
WS14/02_M56 7/10/2020 11:28:34 PM (Run: 1)		292.639	272.631	14.4655	0.931628	146.261		0.0142178	4.49736	19.392	2.73469	0.24929	4.03523	0.0350612	2.96724	0.733063	28.5216	2.96724	0.0515676	2.73469	-4.29705e-16		285.348	12.7429	266.254	62.7484	225.999	8.17598	222.147	6.47935		16.566		222.312	6.52144	207.142	2662.98		316.016	10.158	1253.69	770393	3.88274	0.582315	27.2759	0.195326	2.41892	5.16628	1.05798
WS14/02_M49 7/10/2020 11:14:55 PM (Run: 1)		438.295	314.947	20.5836	0.718574	571.796		0.0147553	3.45157	18.0208	3.50431	0.267761	4.25367	0.0349962	2.41113	0.564183	28.5746	2.41113	0.0554914	3.50431	0		296.058	10.1442	432.11	78.0776	240.902	9.1223	221.742	5.25558		48.6839		237.889	5.27288	208.913	1915.96		182.201	8.57092	1272.74	756126	5.41445		46.1954	0.111455	2.41468	5.98363	1.8933
WS14/02_L39 7/10/2020 10:49:08 PM (Run: 1)		141.822	148.471	6.74411	1.04689	252.581		0.0110436	5.01997	18.3041	4.52789	0.262691	5.79619	0.0348732	3.61857	0.623004	28.6753	3.61857	0.0546326	4.52789	0		221.99	11.0829	397.207	101.502	236.833	12.2439	220.976	7.86067		44.3674		232.598	7.88653	215.274	2453.84		237.811	16.8543	1104.3	873706	1.49703		13.8354	0.164103	3.49787	6.59155	1.36216
WS14/02_L36 7/10/2020 10:35:09 PM (Run: 1)		237.176	208.905	10.8723	0.880802	849.199		0.0113104	4.5138	19.7251	5.46437	0.243554	6.60938	0.0348427	3.71815	0.561449	28.7004	3.71815	0.0506969	5.46437	-1.71372e-16		227.323	10.2034	227.11	126.269	221.326	13.1438	220.786	8.07017		2.78454		217.366	8.15373	214.797	2276.79		271.997	21.5368	837.413	842234	2.34936		13.5738	0.10184	1.77058	4.22311	0.495348
WS14/02_M45 7/10/2020 11:00:57 PM (Run: 1)		152.124	98.948	6.75475	0.650441	221.101		0.0134673	6.12202	19.9958	5.66364	0.239122	6.4851	0.0346783	3.15906	0.485799	28.8365	3.15906	0.0500104	5.66364	1.9437e-16		270.386	16.4428	195.459	131.634	217.701	12.7073	219.762	6.82542		-12.4338		213.521	6.91621	209.212	1593.47		216.832	10.0914	600.819	766743	2.67435	0.00597225	16.6208	0.019507	0.873659	2.95883	0.646309
WS14/02_L35 7/10/2020 10:33:12 PM (Run: 1)		102.454	77.874	4.52959	0.760091	550.402		0.0111264	6.11738	17.9649	7.42191	0.265801	8.71417	0.0346323	4.56641	0.523337	28.8748	4.56641	0.0556641	7.42191	0		223.646	13.6058	439.026	165.165	239.331	18.5801	219.475	9.85343		50.0087		234.981	9.89465	213.566	1323.6		248.229	22.5365	616.671	851105	1.87726		9.48948	0.0396752	1.25135	2.60778	0.619591
WS14/02_M70 7/11/2020 12:12:09 AM (Run: 1)		174.336	87.3628	7.25677	0.501116	298.268		0.0118513	7.0888	18.381	4.20212	0.25922	5.15778	0.034557	2.9908	0.578097	28.9377	2.9908	0.054404	4.20212	-1.3843e-16		238.132	16.7816	387.771	94.3567	234.038	10.781	219.006	6.44003		43.5217		229.998	6.4685	212.649	1226.76		136.785	5.13424	648.92	801139	3.13304		17.6124	0.0246182	0.526335	1.80592	0.485838
WS14/02_S81 7/11/2020 12:41:41 AM (Run: 1)		470.408	383.475	20.1935	0.815197	851.502		0.00905899	5.45765	19.7387	3.67764	0.240108	4.26907	0.0343735	2.16793	0.504877	29.0922	2.16793	0.050662	3.67764	-2.19271e-16		182.277	9.90333	225.494	85.0077	218.509	8.39287	217.862	4.64418		3.38443		215.407	4.69791	218.951	2132.27		179.286	17.5829	730.537	1.03999e+06	3.92322		8.94685	0.0441733	1.2057	3.0849	0.179693
WS14/02_M59 7/10/2020 11:42:35 PM (Run: 1)		544.773	533.908	26.3708	0.980057	634.624		0.0132336	2.56716	20.0367	2.78211	0.235653	3.87979	0.034245	2.70418	0.6944	29.2014	2.70418	0.0499085	2.78211	2.32719e-16		265.725	6.77694	190.761	64.7161	214.854	7.51301	217.061	5.77202		-13.7869		212.031	5.82458	205.051	1869.92		209.785	18.4413	1702.06	765141	3.76313	0.0227206	14.106	0.355267	6.4327	10.756	1.22136
WS14/02_L41 7/10/2020 10:53:03 PM (Run: 1)		128.234	134.182	6.00619	1.04638	2710.81		0.0112382	3.65616	20.4337	6.37907	0.23064	6.99675	0.0341806	2.87437	0.409462	29.2563	2.87437	0.0489388	6.37907	3.79137e-16		225.881	8.21259	144.929	149.642	210.727	13.3147	216.661	6.12414		-49.4941		206.502	6.23239	209.473	2891.75		215.894	15.3561	1196.72	882452	0.661756		14.566	0.377794	6.51982	11.7752	3.77911
WS14/02_M48 7/10/2020 11:12:58 PM (Run: 1)		280.734	150.408	11.8738	0.535765	687.698		0.0136971	4.26727	20.4152	2.71649	0.229366	4.29042	0.0339611	3.32091	0.772119	29.4454	3.32091	0.0489831	2.71649	-1.9322e-16		274.968	11.6542	146.993	63.7015	209.675	8.1279	215.292	7.03158		-46.4639		206.023	7.10042	205.744	1484.32		110.86	5.57826	738.818	776435	2.00896		17.2565	0.0608035	0.827256	1.80398	1.04757
WS14/02_S84 7/11/2020 12:47:33 AM (Run: 1)		269.249	193.979	11.2364	0.720445	776.5		0.00958861	6.70883	20.2837	4.11357	0.230068	5.08538	0.0338456	2.98992	0.586152	29.5459	2.98992	0.0493007	4.11357	2.83245e-16		192.883	12.8786	162.132	96.1941	210.255	9.65786	214.572	6.30994		-32.344		206.486	6.3825	212.604	1332.28		97.0059	4.05896	677.88	1.00827e+06	1.70439	0.0723063	20.3672	0.0375789	0.992373	1.29675	0.682507
WS14/02_S77 7/11/2020 12:33:53 AM (Run: 1)		689.864	543.932	28.8517	0.788463	7508.75		0.00855281	2.65137	19.7662	2.72315	0.235816	3.17212	0.0338061	1.62689	0.507593	29.5804	1.62689	0.0505913	2.72315	-3.96017e-16		172.136	4.54457	222.248	62.9826	214.988	6.14608	214.326	3.42952		3.56485		212.614	3.46813	217.037	2222.73		74.5697	4.10202	598.879	1.035e+06	1.45271		17.0433	0.0515936	0.362118	1.21113	0.725752
WS14/02_S82 7/11/2020 12:43:38 AM (Run: 1)		385.495	421.418	17.3056	1.09319	1969.51		0.00915728	4.59334	19.4371	3.38734	0.239556	4.22489	0.0337705	2.52499	0.595092	29.6116	2.52499	0.0514479	3.38734	2.04023e-16		184.246	8.42458	260.961	77.7964	218.057	8.29059	214.104	5.31731		17.9555		214.666	5.36016	215.516	2717.83		197.567	7.76006	1424.89	1.07019e+06	4.64785		34.345	0.047671	1.44411	4.79383	1.25588
WS14/02_S83 7/11/2020 12:45:36 AM (Run: 1)		149.076	170.05	6.72078	1.14069	778.025		0.00912544	6.78166	20.1183	7.13218	0.231367	7.70866	0.0337592	2.92498	0.378231	29.6215	2.92498	0.0497059	7.13218	1.6663e-16		183.608	12.3953	181.275	166.195	211.327	14.707	214.033	6.15763		-18.071		207.164	6.27099	214.841	2753.24		244.782	3.69278	1746.95	1.04676e+06	7.32959		47.1968	0.0429418	1.03261	3.97117	1.03424
WS14/02_M53 7/10/2020 11:22:43 PM (Run: 1)		249.158	122.563	10.1793	0.491908	108.438		0.0125572	5.24356	20.2382	4.86475	0.229598	5.23723	0.0337007	1.93978	0.367706	29.673	1.93978	0.0494116	4.86475	1.84579e-16		252.229	13.1436	167.447	113.646	209.867	9.92972	213.668	4.07676		-27.6037		206.107	4.15574	206.17	1235.93		183.931	6.61256	671.331	770452	3.59282		17.2977	0.0322507	1.07648	1.85926	0.834694
WS14/02_M55 7/10/2020 11:26:37 PM (Run: 1)		262.83	105.422	10.4513	0.401102	253.242		0.012798	5.3539	20.7516	4.37338	0.223809	5.32906	0.0336843	3.04505	0.56973	29.6875	3.04505	0.0481891	4.37338	-1.30834e-16		257.033	13.6742	108.588	103.286	205.075	9.89564	213.566	6.39664		-96.6752		201.363	6.48236	206.493	492.98		82.5348	2.85224	218.022	766755	0.71676		10.4803		0.232463	0.263212	0.305911
WS14/02_M50 7/10/2020 11:16:52 PM (Run: 1)		551.969	207.128	22.0814	0.375253	1727.2		0.0136357	3.81879	19.724	2.87853	0.235375	3.94753	0.0336709	2.7013	0.681751	29.6993	2.7013	0.0506997	2.87853	-2.25282e-16		273.744	10.3832	227.235	66.5149	214.626	7.63691	213.482	5.67236		6.05221		211.968	5.71647	206.793	925.457		122.084	2.70209	507.647	754249	1.14412		11.1103	0.0204999	0.481771	1.03738	0.719016
WS14/02_S78 7/11/2020 12:35:50 AM (Run: 1)		124.741	201.222	6.00269	1.61312	814.356		0.00842173	3.80076	20.5761	6.59159	0.225611	7.54239	0.0336683	3.66587	0.485049	29.7015	3.66587	0.0486001	6.59159	0		169.508	6.41567	128.617	155.095	206.569	14.0976	213.466	7.69724		-65.9707		202.371	7.81184	221.462	5356.41		284.935	4.94101	1892.99	1.03719e+06	1.75709		20.7379	0.163072	2.77332	6.4554	2.12488
WS14/02_M63 7/10/2020 11:50:23 PM (Run: 1)		258.057	201.796	11.3751	0.781985	496.227		0.0120943	4.81872	19.3929	3.30311	0.238659	4.73559	0.0335676	3.39342	0.714884	29.7906	3.39342	0.0515652	3.30311	1.55443e-16		242.985	11.6387	266.143	75.7925	217.322	9.26468	212.838	7.10455		20.0286		213.655	7.14786	204.274	1917.23		490.566	3.82153	2076.94	788277	8.25588		30.7581	0.0169961	0.563095	2.99716	0.41141
WS14/02_M54 7/10/2020 11:24:40 PM (Run: 1)		155.316	84.0086	6.29941	0.540887	200.075		0.0115624	7.25968	19.8533	4.62712	0.231726	5.1408	0.0333663	2.24	0.433368	29.9704	2.24	0.0503694	4.62712	-1.67755e-16		232.36	16.772	212.072	107.217	211.623	9.82023	211.582	4.66251		0.230859		207.576	4.72901	204.942	1495.95		191.216	9.81905	709.432	748670	1.83626	0.00586395	12.4963	0.0716556	1.53287	3.3324	0.878669
WS14/02_L37 7/10/2020 10:45:14 PM (Run: 1)		114.934	145.858	5.54531	1.26906	269.919		0.0111579	4.23618	18.4161	5.64018	0.247521	6.64299	0.0330604	3.50966	0.527158	30.2477	3.50966	0.0543004	5.64018	0		224.276	9.44823	383.501	126.742	224.561	13.3831	209.674	7.24044		45.3264		220.388	7.27927	200.609	1818.53		400.254	22.5252	1858.78	844392	3.40577	0.188661	31.3702	0.135126	3.18772	5.43702	2.38082
Experiment on July 10, 2020
Isotope ratio and date errors do not include systematic calibration errors of 0.24% (207Pb/206Pb) and 0.64% (206Pb/238U) (2 sigma).
Trace element concentrations were deleted from analyses known to have intersected inclusions of other minerals based on P and Ti.
Ablation used a laser spot size of 25 microns and a laser firing repetition rate of 5 Hz.
Activity of TiO2 for Ti-in-Zircon temperature calculation is 0.8.
WS14/03_S126 7/10/2020 10:19:28 PM (Run: 1)		81.3738	57.8243	30.4481	0.710601	3474.57		0.0736136	3.08947	9.42704	1.77366	4.30615	3.32887	0.294417	2.817	0.843329	3.39654	2.817	0.106078	1.77366	-1.75698e-16		1435.67	42.8161	1733.07	32.5379	1694.54	27.4307	1663.57	41.3042		4.01024		1685.13	45.5402	1666.01	1268.11		204.691	15.294	697.344	994162	2.4485		9.96718	0.060558	0.943505	2.01945	0.281955
WS14/03_M104 7/10/2020 9:14:26 PM (Run: 1)		204.568	104.515	77.836	0.510904	10619.7		0.101646	3.31648	9.5172	1.15773	4.24761	2.73914	0.293193	2.48245	0.902261	3.41073	2.48245	0.105073	1.15773	-3.13387e-16		1956.65	61.8498	1715.61	21.2849	1683.28	22.5127	1657.46	36.2818		3.38909		1694.86	39.9626	1659.77	952.123		257.143	10.6286	884.157	749743	2.65236	0.0179348	14.9787	0.0518776	1.24038	3.29869	0.38564
WS14/03_S122 7/10/2020 10:03:39 PM (Run: 1)		108.436	80.6978	44.2048	0.744197	2030.27		0.0767489	3.35398	9.65236	1.66984	4.56821	3.30265	0.3198	2.84941	0.859866	3.12696	2.84941	0.103602	1.66984	3.70806e-16		1494.61	48.3205	1689.63	30.8013	1743.49	27.5121	1788.75	44.5085		-5.86664		1737.62	50.1953	1805	1418.94		177.283	12.3929	849.491	1.00082e+06	3.05076		11.88	0.0373192	1.04087	2.54846	0.320874
WS14/03_S116 7/10/2020 9:51:57 PM (Run: 1)		118.655	130.769	45.7102	1.10209	2384.94		0.0655856	2.62275	9.74201	2.03544	4.04452	2.77812	0.285769	1.89074	0.675388	3.49933	1.89074	0.102648	2.03544	2.29212e-16		1283.97	32.6279	1672.55	37.6266	1643.2	22.6166	1620.35	27.0896		3.12121		1637.78	29.8969	1660.03	2236.82		231.193	20.0006	4707.98	1.02698e+06	3.18252		4.61287	0.477705	10.9735	20.2549	5.07514
WS14/03_S130 7/10/2020 10:27:16 PM (Run: 1)		112.964	115.309	47.3066	1.02076	2320.73		0.0793428	2.75852	9.74541	1.35697	4.35504	3.73581	0.307816	3.48064	0.929604	3.24869	3.48064	0.102612	1.35697	1.87153e-16		1543.24	40.9861	1671.89	25.087	1703.85	30.8492	1729.95	52.8107		-3.47276		1699.79	58.9396	1747.21	1996.49		295.66	18.9621	2100.75	959311	3.36675	0.0411811	8.29879	0.281004	6.08564	12.615	1.6517
WS14/03_S128 7/10/2020 10:23:22 PM (Run: 1)		28.5051	21.881	7.23906	0.767618	634.463		0.0547539	6.11414	12.3705	2.09967	2.23235	4.21869	0.200284	3.65906	0.865581	4.9929	3.65906	0.0808377	2.09967	2.26353e-16		1077.46	64.1522	1217.52	41.2869	1191.26	29.5836	1176.85	39.3596		3.34086		1176.6	41.4616	1162.69	1646.32		179.982	17.4278	554.994	970825	2.95803		5.03609	0.0821743	1.08065	2.33584	0.13547
WS14/03_L85 7/10/2020 8:29:05 PM (Run: 1)		108.758	73.7454	27.4306	0.678066	59759.7		0.0594798	3.31177	12.5511	1.86735	2.18264	3.10788	0.198685	2.48433	0.7958	5.03309	2.48433	0.079674	1.86735	0		1167.82	37.5793	1188.93	36.8712	1175.52	21.6415	1168.25	26.5453		1.73917		1167.04	28.0001	1153.91	958.608		196.825	10.9181	855.348	848429	4.71225	0.0222092	9.78638	0.0659271	1.47373	3.76558	0.183793
WS14/03_S129 7/10/2020 10:25:19 PM (Run: 1)		70.5298	73.3287	17.966	1.03968	371.757		0.0488534	2.4805	12.6947	2.98445	2.0878	4.13432	0.192225	2.86106	0.689724	5.20225	2.86106	0.078773	2.98445	2.04596e-16		964.069	23.3524	1166.46	59.1212	1144.8	28.384	1133.42	29.7369		2.83282		1133.53	31.3374	1140.02	2346.24		247.729	20.4051	2367.88	965408	2.5574	0.0589937	6.87961	0.591464	12.1261	20.0877	1.55433
WS14/03_L89 7/10/2020 8:36:54 PM (Run: 1)		44.3459	44.1705	12.0886	0.996044	251.871		0.0616391	3.83041	12.7026	3.5793	2.16633	4.78431	0.199579	3.17462	0.661737	5.01054	3.17462	0.078724	3.5793	0		1208.97	44.9508	1165.23	70.9178	1170.3	33.2366	1173.06	34.0483		-0.672076		1157.06	36.0957	1144.26	2201.28		219.449	18.0826	1253.75	854144	2.46125		6.17907	0.135519	4.34012	9.00312	0.692216
WS14/03_S119 7/10/2020 9:57:48 PM (Run: 1)		93.7717	131.327	25.8207	1.4005	308.851		0.0467347	2.44373	12.7062	2.33499	2.14347	3.06661	0.19753	1.98795	0.643782	5.06252	1.98795	0.0787016	2.33499	0		923.2	22.053	1164.66	46.2677	1162.95	21.2323	1162.04	21.1383		0.225242		1152.65	22.3868	1195.45	3284.72		110.645	7.60024	2247.27	1.03219e+06	2.42634	0.0318217	8.1035	0.585064	13.4668	21.0746	3.10705
WS14/03_M92 7/10/2020 8:42:51 PM (Run: 1)		100.229	68.5037	26.1097	0.68347	804.295		0.0703557	4.3184	12.7359	2.6352	2.16191	4.46629	0.199694	3.60603	0.805682	5.00766	3.60603	0.0785183	2.6352	0		1374.24	57.3729	1160.03	52.2521	1168.88	31.0073	1173.68	38.6939		-1.17665		1159.3	40.9046	1137.77	1476.22		248.592	10.2532	814.687	746813	7.3767	0.199019	8.55127	0.194901	3.84196	7.02922	0.818046
WS14/03_L88 7/10/2020 8:34:57 PM (Run: 1)		109.723	86.1499	28.5164	0.785161	1439.89		0.0602646	3.60388	12.753	1.85716	2.15651	3.14575	0.199464	2.53903	0.803687	5.01343	2.53903	0.0784126	1.85716	1.86145e-16		1182.78	41.4029	1157.35	36.8394	1167.15	21.8222	1172.44	27.2185		-1.3043		1158.96	28.772	1157.23	1667.17		235.273	11.75	983.945	815155	7.07255		13.9773	0.0733369	1.99556	4.95604	0.16893
WS14/03_S113 7/10/2020 9:40:03 PM (Run: 1)		21.0833	12.1853	4.96566	0.57796	186.082		0.0441142	8.52368	12.8028	5.16061	2.14486	6.27837	0.19916	3.57576	0.56832	5.02108	3.57576	0.078108	5.16061	-1.88324e-16		872.535	72.7897	1149.63	102.483	1163.4	43.4785	1170.81	38.2836		-1.84209		1148.17	40.7428	1169.57	812.777		39.0434	8.49708	654.841	1.02497e+06	4.76133		5.16543	0.00784204	0.806482	1.72825	0.121863
WS14/03_M96 7/10/2020 8:58:47 PM (Run: 1)		54.577	39.1972	13.6087	0.7182	1045.56		0.0678664	5.25458	12.8521	3.20682	2.03432	4.44232	0.189624	3.07416	0.690009	5.2736	3.07416	0.0778082	3.20682	-1.76865e-16		1327.18	67.4976	1142	63.7546	1127.06	30.2411	1119.34	31.5884		1.98473		1114.55	33.274	1076.57	1913.14		201.641	15.7095	651.49	764227	3.66007	0.0212781	7.33666	0.0377376	1.26863	3.1728	0.313214
WS14/03_S109 7/10/2020 9:32:15 PM (Run: 1)		52.4166	54.2713	13.2095	1.03538	145041		0.0481917	5.59355	12.8608	2.45947	2.04885	3.12451	0.191108	1.92705	0.612215	5.23265	1.92705	0.0777555	2.45947	-1.8389e-16		951.315	51.9794	1140.65	48.9065	1131.91	21.3199	1127.37	19.9315		1.16375		1119.16	21.0646	1132.43	2295.29		162.859	12.8392	853.711	992244	2.96342	0.0151107	7.58421	0.109242	1.45432	3.73423	0.169693
WS14/03_S117 7/10/2020 9:53:54 PM (Run: 1)		113.757	142.924	29.0756	1.2564	1005.42		0.0449038	3.3195	12.8662	1.87728	2.00643	3.01219	0.187228	2.35566	0.778197	5.34107	2.35566	0.0777231	1.87728	1.98252e-16		887.815	28.8331	1139.83	37.3339	1117.68	20.412	1106.34	23.948		2.93756		1109.04	25.1371	1133.45	2057.87		218.533	13.3408	2927.4	1.02255e+06	3.15783	0.0505291	9.89506	0.430296	9.78739	17.056	1.43751
WS14/03_S115 7/10/2020 9:50:00 PM (Run: 1)		38.4934	41.4819	9.68049	1.07764	236.465		0.0466357	6.70648	12.946	4.76201	2.03046	5.39144	0.190646	2.52803	0.466894	5.24533	2.52803	0.0772442	4.76201	1.44579e-16		921.288	60.399	1127.49	94.8771	1125.77	36.6793	1124.87	26.0942		0.232401		1112.02	27.7999	1133.86	1230.65		205.038	21.4738	1092.22	1.04899e+06	3.26827		6.13791	0.0773252	2.30608	4.63662	0.191756
WS14/03_S114 7/10/2020 9:42:00 PM (Run: 1)		52.989	57.5104	13.5467	1.08533	785.795		0.0459684	4.55254	12.9488	2.78057	2.07232	3.24999	0.194618	1.68253	0.512707	5.13827	1.68253	0.0772274	2.78057	-3.72652e-16		908.398	40.4396	1127.07	55.4025	1139.7	22.2588	1146.34	17.6699		-1.70992		1126.92	18.8148	1162.62	1860.14		195.704	18.0203	915.09	1.04065e+06	3.31886	0.02987	8.54151	0.0534171	1.01206	3.63796	0.245923
WS14/03_L87 7/10/2020 8:32:59 PM (Run: 1)		34.2663	33.9007	8.8942	0.989329	423.155		0.057681	4.67528	13.2491	4.90896	1.99977	6.8858	0.192162	4.8287	0.700427	5.20395	4.8287	0.0754766	4.90896	1.46855e-16		1133.47	51.5345	1081.2	98.4798	1115.43	46.6097	1133.07	50.1741		-4.79744		1101.59	53.1049	1108.89	2256.85		232.743	23.7633	876.583	825381	2.89252	0.0274707	5.37645	0.183107	2.95525	5.97787	0.562443
WS14/03_S124 7/10/2020 10:07:34 PM (Run: 1)		321.757	254.916	73.4189	0.792263	4488.23		0.0450741	3.26886	13.4379	2.00513	1.82742	3.43115	0.178102	2.78428	0.808619	5.61477	2.78428	0.0744167	2.00513	1.60017e-16		891.109	28.4963	1052.79	40.3967	1055.35	22.5174	1056.6	27.1342		-0.361412		1059.14	28.4153	1082.14	1755.09		286.179	11.5039	1563.22	1.01167e+06	2.85402	0.0127597	10.7382	0.0569675	1.93173	4.38002	0.162278
WS14/03_M94 7/10/2020 8:46:45 PM (Run: 1)		793.519	216.427	32.8921	0.272743	984.484		0.0136427	3.85887	19.4064	1.93591	0.257168	3.36382	0.036196	2.75091	0.814826	27.6273	2.75091	0.0515294	1.93591	-1.65327e-16		273.883	10.4975	264.538	44.434	232.382	6.98692	229.211	6.19461		13.3543		230.634	6.23258	225.262	651.202		138.246	2.99345	808.708	730150	4.26754	0.00266999	12.84	0.0144315	0.795384	1.71014	0.849208
WS14/03_L91 7/10/2020 8:40:48 PM (Run: 1)		423.599	333.121	18.9163	0.786406	337.767		0.0111753	2.5957	20.3024	4.26859	0.235875	5.2285	0.0347318	3.01934	0.575735	28.792	3.01934	0.0492553	4.26859	-1.35653e-16		224.625	5.79829	160.006	99.857	215.037	10.1325	220.095	6.53326		-37.5544		211.888	6.61231	215.618	2020.64		250.986	7.8252	1171.47	824620	3.81998		31.0129	0.0547704	1.12608	4.29834	1.03983
WS14/03_S123 7/10/2020 10:05:37 PM (Run: 1)		443.332	167.307	17.7896	0.377385	201.234		0.0116302	4.44208	19.3199	2.2742	0.246642	2.67339	0.0345597	1.40534	0.518422	28.9354	1.40534	0.0517602	2.2742	2.73232e-16		233.714	10.322	274.833	52.101	223.845	5.37052	219.023	3.02632		20.3068		220.558	3.05532	214.305	461.98		137.731	3.94308	712.996	1.03696e+06	1.11794		9.16367	0.0280498	1.0597	3.00734	0.491412
WS14/03_S121 7/10/2020 10:01:42 PM (Run: 1)		321.773	124.565	12.3056	0.387121	4589.65		0.00861716	7.88667	19.9565	3.63511	0.234023	4.63978	0.0338721	2.88332	0.619396	29.5229	2.88332	0.0501089	3.63511	0		173.425	13.619	200.07	84.4145	213.514	8.93432	214.737	6.08955		-7.33104		209.906	6.1487	213.108	863.146		85.8106	3.09567	806.881	1.04606e+06	1.99397		13.702	0.0188775	0.446253	1.34418	0.573607
WS14/03_M93 7/10/2020 8:44:48 PM (Run: 1)		166.131	269.551	9.14978	1.62252	79.1384		0.0125101	1.77629	18.8906	5.10906	0.246264	5.79453	0.03374	2.73387	0.470067	29.6384	2.73387	0.0529364	5.10906	0		251.288	4.43597	326.07	115.978	223.537	11.6262	213.913	5.75214		34.3966		219.482	5.80658	195.975	3390.8		309.92	23.439	2008.53	763972	2.66949	0.0210132	22.4367	0.524509	9.32395	13.0554	3.13224
WS14/03_L86 7/10/2020 8:31:02 PM (Run: 1)		203.902	114.971	8.33539	0.563853	2268.2		0.0109412	8.48894	18.9569	3.18016	0.244723	4.92181	0.0336466	3.75643	0.761732	29.7207	3.75643	0.0527512	3.18016	-1.45711e-16		219.945	18.5698	318.111	72.2937	222.281	9.82554	213.331	7.88248		32.9383		218.432	7.91252	208.112	1428.11		135.273	6.75747	273.475	829503	0.442373	0.0130839	4.73767	0.0272758	0.70404	1.13214	0.461903
WS14/03_S120 7/10/2020 9:59:45 PM (Run: 1)		143.152	221.364	6.75502	1.54635	670.661		0.008321	6.29188	19.5796	6.94334	0.235	7.60043	0.033371	3.09136	0.405574	29.9662	3.09136	0.0510737	6.94334	0		167.489	10.4947	244.135	159.954	214.318	14.6848	211.612	6.43548		13.3219		210.207	6.53121	219.103	4303.36
WS14/03_S105 7/10/2020 9:24:26 PM (Run: 1)		406.102	211.664	15.9711	0.52121	1508.05		0.00942257	4.0817	20.2618	4.18841	0.227048	5.18424	0.0333652	3.0551	0.587577	29.9714	3.0551	0.049354	4.18841	0		189.559	7.70104	164.646	97.8995	207.759	9.74027	211.575	6.35891		-28.5035		204.494	6.4299	209.604	1329.53		96.6118	4.16893	1046.94	971031	3.1781	0.0225696	18.6437	0.0604868	0.605109	1.81042	0.799463
WS14/03_L90 7/10/2020 8:38:51 PM (Run: 1)		137.271	94.4115	5.62722	0.687773	352.781		0.0100148	5.55642	20.5807	5.0531	0.222646	6.06259	0.0332333	3.3498	0.551182	30.0903	3.3498	0.0485893	5.0531	2.05413e-16		201.414	11.1358	128.082	118.908	204.11	11.2099	210.753	6.94565		-64.5452		200.046	7.03601	206.899	1754.46		217.775	15.3228	728.996	847480	1.05834		13.2349	0.0295512	0.757297	2.77518	0.940921
WS14/03_S112 7/10/2020 9:38:06 PM (Run: 1)		709.838	335.657	27.522	0.472865	459.617		0.00902846	3.31348	19.1626	2.61254	0.238855	3.48653	0.0331961	2.30878	0.658808	30.124	2.30878	0.052185	2.61254	-1.45456e-16		181.666	5.99249	293.547	59.6509	217.482	6.82552	210.52	4.78196		28.284		215.226	4.80864	210.009	608.082		369.421	3.59249	2542.73	1.012e+06	12.1978	0.0673341	14.3346	0.100827	1.98485	5.00841	0.787116
WS14/03_S108 7/10/2020 9:30:18 PM (Run: 1)		615.153	495.176	25.4584	0.804964	4323.25		0.00916544	2.05352	19.7196	2.33804	0.229338	3.26144	0.0327998	2.27387	0.693514	30.4879	2.27387	0.050711	2.33804	-1.64855e-16		184.409	3.76966	227.728	54.0215	209.652	6.17793	208.048	4.65522		8.64214		207.179	4.68892	208.22	2084.93		128.375	4.29548	1287.97	976406	4.82192		28.0759	0.0498252	0.839731	2.52182	1.55069
WS14/03_S131 7/10/2020 10:29:13 PM (Run: 1)		754.859	379.936	29.2879	0.503321	1438.81		0.00945623	3.632	19.5542	2.26985	0.2308	3.91791	0.0327322	3.1934	0.812901	30.551	3.1934	0.0511398	2.26985	1.21227e-16		190.233	6.87684	247.149	52.2614	210.859	7.45988	207.626	6.52467		15.9917		208.891	6.55986	206.693	1248.38		103.502	3.52336	880.981	945118	3.5547	0.0191964	23.2756	0.0145709	1.07933	1.92143	0.69438
WS14/03_S125 7/10/2020 10:17:31 PM (Run: 1)		811.16	444.91	30.9654	0.548486	520.314		0.00878971	5.43016	19.7352	2.19389	0.224214	3.86455	0.0320925	3.18145	0.821023	31.16	3.18145	0.050671	2.19389	1.25872e-16		176.883	9.5631	225.914	50.7071	205.411	7.1868	203.631	6.37717		9.86334		203.43	6.4143	203.666	715.519		164.874	4.34935	1280.86	1.00135e+06	4.94754		30.6322	0.00915866	0.697383	2.22998	0.813237
WS14/03_M100 7/10/2020 9:06:35 PM (Run: 1)	z4	316.182	335.242	14.6059	1.06028	115.413		0.0118089	3.34175	20.4434	3.25716	0.220597	4.2357	0.0327078	2.70777	0.636884	30.5738	2.70777	0.0489155	3.25716	1.97687e-16		237.285	7.88311	143.83	76.4227	202.406	7.77287	207.473	5.52845		-44.2491		198.921	5.58801	197.321	2791.41		513.294	6.16571	2881.99	748804	3.11725	0.0391659	37.4486	0.388903	6.65833	13.9308	5.00599
WS14/03 M 21 7/12/2020 2:47:41 PM (Run: 1)	z4	226.497	175.438	9.57292	0.774574	126.049		0.0121321	4.40614	19.1454	3.65844	0.224926	4.68539	0.0312322	2.92723	0.622154	32.0182	2.92723	0.0522319	3.65844	0		243.741	10.6751	295.582	83.5015	206.001	8.73586	198.256	5.71508		32.927		206.171	5.7447	192.275	2255.56		220.43	5.38811	1281.54	694600	1.79222	0.0136871	21.271	0.0815833	2.00496	4.5668	1.36818
WS14/03 M 22 7/12/2020 2:49:38 PM (Run: 1)	z4	161.942	124.378	6.80195	0.768042	223.286		0.0116503	4.76123	19.613	2.37086	0.22108	3.91079	0.031448	3.11019	0.792349	31.7985	3.11019	0.0509865	2.37086	3.61385e-16		234.115	11.0825	240.202	54.6564	202.808	7.1895	199.604	6.11295		16.9016		202.885	6.14414	195.112	2106.3		189.114	5.14663	943.5	691494	0.941604		15.2273	0.0893991	1.95761	3.52091	1.1493
WS14/03_S127 7/10/2020 10:21:25 PM (Run: 1)		290.622	175.41	11.2097	0.603567	1482.94		0.0084328	4.14666	19.2652	2.83874	0.232206	4.3759	0.0324449	3.33017	0.759156	30.8215	3.33017	0.051907	2.83874	3.68678e-16		169.73	7.00866	281.348	64.9574	212.018	8.37312	205.832	6.74628		26.8409		208.5	6.7777	205.203	1607.98		396.461	4.90085	1880.46	989926	5.0067		16.2273	0.00372005	0.690865	2.65202	0.822512
WS14/03 S 32 7/12/2020 3:17:13 PM (Run: 1)		349.187	213.866	13.4329	0.612469	2175.78		0.00898409	5.38901	19.9798	3.06295	0.216612	3.93146	0.0313887	2.4647	0.623231	31.8586	2.4647	0.0500506	3.06295	0		180.777	9.69864	197.37	71.1628	199.086	7.10747	199.234	4.83541		-0.944392		199.12	4.8763	201.15	1563.93		365.703	4.80925	2025.96	882841	6.01882		20.5928	0.0486869	1.04333	3.14574	0.59288
WS14/03_M98 7/10/2020 9:02:42 PM (Run: 1)	z6	52.8377	27.3956	2.10012	0.518486	67.1681		0.0126687	11.1407	19.3047	7.19028	0.230586	8.22737	0.0322847	3.9987	0.48519	30.9745	3.9987	0.0518008	7.19028	0		254.454	28.1703	276.666	164.669	210.683	15.6535	204.831	8.06183		25.9644		206.422	8.14159	195.608	1282.02		292.596	14.1942	621.116	761487	0.884129		6.99176	0.00813183	1.02126	1.9089	0.511481
WS14/03 M 18 7/12/2020 2:33:43 PM (Run: 1)	z6	56.0424	28.0461	2.18916	0.500443	46.2266		0.0131503	11.6487	19.9989	9.00975	0.213271	9.55343	0.030934	3.17685	0.331358	32.3269	3.17685	0.0500028	9.00975	0		264.064	30.5599	195.127	209.415	196.294	17.0515	196.391	6.14498		-0.648049		196.296	6.27459	190.872	1275.68		236.595	13.3417	564.459	688813	0.80558	0.0288933	6.73154	0.0312336	0.811329	1.75114	0.597189
WS14/03 M 19 7/12/2020 2:35:39 PM (Run: 1)	z6	87.5025	72.9722	3.73843	0.833944	340.264		0.0120173	4.98118	19.0323	5.94374	0.225073	6.92309	0.0310679	3.54982	0.511296	32.1875	3.54982	0.0525424	5.94374	0		241.448	11.9554	309.07	135.337	206.123	12.9149	197.229	6.89524		36.1863		206.298	6.94604	190.883	2302.73		230.515	15.5657	1155.8	673138	1.02502		9.36756	0.13955	3.61899	5.97332	1.62132
WS14/03_M99 7/10/2020 9:04:38 PM (Run: 1)	z5	295.335	116.672	11.2373	0.395049	276.254		0.0124121	6.37002	20.6769	2.97793	0.214892	3.89067	0.0322259	2.50384	0.640736	31.031	2.50384	0.0483631	2.97793	3.50602e-16		249.332	15.7849	117.098	70.2185	197.65	6.98774	204.464	5.03913		-74.6088		194.129	5.09637	197.581	996.347		139.274	3.81427	652.975	762093	2.57421	0.0413135	17.5242	0.0302388	0.569647	1.35808	0.682914
WS14/03 M 20 7/12/2020 2:37:36 PM (Run: 1)	z5	172.661	49.6386	6.42208	0.287492	440.707		0.0122397	5.85498	20.0189	4.63618	0.220885	5.66502	0.0320704	3.2555	0.57273	31.1814	3.2555	0.0499528	4.63618	2.35411e-16		245.889	14.3095	192.795	107.806	202.646	10.4069	203.493	6.52125		-5.54888		202.649	6.58538	201.597	739.346		84.9195	3.38007	330.806	694106	1.11889		9.56571	0.0196784	0.206236	0.802269	0.391285
WS14/03_M95 7/10/2020 8:56:50 PM (Run: 1)	z7	337.952	109.898	12.6234	0.325188	521.465		0.0126862	4.12421	19.3644	3.86755	0.229152	4.58926	0.0321829	2.4705	0.535902	31.0724	2.4705	0.0516413	3.86755	-1.8252e-16		254.803	10.4427	269.586	88.6866	209.498	8.68741	204.196	4.96559		24.2557		206.14	5.0076	197.73	825.904		130.905	2.69877	526.32	752494	1.38612	0.0224165	10.9849	0.0114852	0.321538	1.14634	0.437526
WS14/03 M 15 7/12/2020 2:27:51 PM (Run: 1)	z7	386.001	117.819	14.6619	0.305229	6310.86		0.0125288	4.62466	20.3637	2.62601	0.220407	3.92454	0.0325523	2.91653	0.740029	30.7198	2.91653	0.0491069	2.62601	0		251.662	11.5663	152.93	61.5119	202.249	7.19682	206.503	5.92727		-35.0308		202.217	5.98039	204.385	723.392		128.118	2.82208	577.553	682837	2.45961	0.00516679	13.0054	0.0136104	0.298913	1.10122	0.567681
WS14/03_M102 7/10/2020 9:10:29 PM (Run: 1)		961.077	435.388	37.0047	0.45302	473.223		0.0117367	3.08311	19.6445	1.87149	0.223234	3.30443	0.0318054	2.72338	0.821115	31.4412	2.72338	0.0509048	1.87149	3.46042e-16		235.843	7.22906	236.527	43.1728	204.598	6.12319	201.838	5.41164		14.6662		203.331	5.44015	197.829	1211.21		134.33	5.56712	677.49	769140	3.22356		25.4546	0.126573	0.803826	2.44697	1.20073
WS14/03 M 23 7/12/2020 2:51:35 PM (Run: 1)		772.811	371.999	30.555	0.481358	1091.45		0.0120742	3.39713	20.0244	1.82565	0.221054	3.267	0.0321039	2.7093	0.825256	31.1489	2.7093	0.049939	1.82565	0		242.585	8.19167	192.139	42.4575	202.787	6.00542	203.702	5.43262		-6.01815		202.869	5.46936	200.783	1281.69		98.9161	2.92728	1070.11	681735	2.4434	0.026901	22.0631	0.0527013	2.61431	4.23088	1.895
WS14/03 M 24 7/12/2020 2:53:32 PM (Run: 1)		715.679	288.732	27.3624	0.403437	1841.54		0.0115201	3.96134	20.1507	1.70542	0.21883	3.01122	0.0319813	2.48174	0.819383	31.2683	2.48174	0.0496262	1.70542	-2.09957e-16		231.515	9.11876	177.551	39.7667	200.936	5.48955	202.936	4.9579		-14.2974		200.989	4.99383	201.195	982.317		124.849	3.18673	847.832	689885	2.91132	0.0100313	21.2474	0.0772648	1.37775	2.59623	1.09603
WS14/03_M103 7/10/2020 9:12:29 PM (Run: 1)	z2	433.67	231.199	16.6607	0.533123	257.455		0.0111188	4.36432	23.4343	11.0034	0.186385	11.2289	0.0316782	2.23882	0.198291	31.5674	2.23882	0.0426726	11.0034	2.83719e-16		223.494	9.70028	-186.698	274.981	173.54	17.9123	201.043	4.43152		207.683		170.412	4.6573	195.565	1365.85		233.384	2.10791	1550.99	762264	5.492		12.066	0.0215032	2.32828	5.29672	0.55612
WS14/03 M 25 7/12/2020 2:55:29 PM (Run: 1)	z2	245.725	102.089	9.45369	0.415463	399.756		0.0119142	6.31472	18.7531	3.30674	0.233957	5.01205	0.0318206	3.76645	0.749587	31.4262	3.76645	0.0533246	3.30674	1.42649e-16		239.389	15.0276	342.605	74.8453	213.46	9.64899	201.932	7.48779		41.0597		213.705	7.50281	199.468	1027.56		153.019	4.79958	754.357	698827	3.2567		6.68273	0.0137816	0.890829	3.00862	0.262876
WS14/03 M 26 7/12/2020 2:57:26 PM (Run: 1)	z2	382.187	193.412	14.8725	0.506065	343.366		0.0116084	3.02639	19.7198	2.65262	0.219807	3.73986	0.0314371	2.63631	0.7013	31.8096	2.63631	0.0507106	2.65262	-1.27039e-16		233.279	7.01935	227.713	61.2899	201.749	6.84283	199.536	5.17981		12.374		201.837	5.213	196.807	1318.22		189.35	5.20955	1106.83	705095	4.16442	0.022299	9.34069	0.0604623	2.32009	4.96093	0.484271
WS14/03_S107 7/10/2020 9:28:20 PM (Run: 1)		494.482	360.563	19.1076	0.729174	793.142		0.00848022	3.48179	19.2612	3.62726	0.224423	4.16716	0.0313508	2.05139	0.489076	31.8971	2.05139	0.0519179	3.62726	0		170.681	5.91772	281.817	82.9941	205.584	7.75543	198.997	4.01983		29.3879		202.769	4.05647	199.01	1303.66		120.526	4.74898	1715.73	982622	4.50218	0.0877026	29.2834	0.126584	1.92256	4.47785	1.52039
WS14/03 S 29 7/12/2020 3:03:20 PM (Run: 1)		495.18	290.496	18.4172	0.586649	278.161		0.00794719	4.21493	19.7167	2.57606	0.216448	3.46732	0.0309518	2.32082	0.664904	32.3083	2.32082	0.0507185	2.57606	0		159.995	6.71705	228.073	59.517	198.949	6.26446	196.503	4.49167		13.8422		199.045	4.52154	200.092	1580.38		148.385	5.19969	1601.88	894699	5.8132	0.0369282	31.1813	0.067646	0.989372	2.96637	1.18822
WS14/03 S 30 7/12/2020 3:05:18 PM (Run: 1)		317.81	159.63	11.6836	0.502283	361.315		0.00774878	5.08235	20.099	2.13247	0.214769	2.81787	0.0313072	1.842	0.646804	31.9415	1.842	0.0497538	2.13247	3.39231e-16		156.016	7.89874	183.528	49.6704	197.547	5.05859	198.725	3.60466		-8.28014		197.556	3.6352	202.248	1178.51		94.9504	3.94095	897.744	901388	2.9899		17.9796	0.027577	0.864641	1.75118	0.914183
WS14/03_M97 7/10/2020 9:00:44 PM (Run: 1)		235.183	163.608	9.56304	0.695661	262.676		0.0119419	6.39723	18.7236	4.31697	0.230824	4.92495	0.0313451	2.3704	0.478957	31.9029	2.3704	0.0534084	4.31697	0		239.942	15.2589	346.199	97.6472	210.878	9.37812	198.961	4.64415		42.5298		207.262	4.67915	189.754	910.237		183.32	5.73217	775.939	766689	1.24537	0.0084857	12.7945	0.103364	2.25946	3.6838	1.22581
WS14/03 M 16 7/12/2020 2:29:48 PM (Run: 1)		207.112	130.844	8.20572	0.631752	429.94		0.0120137	4.50786	19.1749	5.3949	0.218875	6.24385	0.0304387	3.14335	0.501611	32.8529	3.14335	0.0521516	5.3949	0		241.376	10.8162	292.037	123.215	200.973	11.3846	193.294	5.9857		33.812		201.138	6.03341	188.256	1493.76		213.538	5.35636	789.876	696381	0.874253	0.743543	12.7854	0.2913	2.27131	3.86938	1.60461
WS14/03_S106 7/10/2020 9:26:23 PM (Run: 1)		200.814	204.449	8.32057	1.0181	145.227		0.00909916	5.43096	19.1559	4.48234	0.224693	5.29669	0.0312169	2.82198	0.530951	32.0339	2.82198	0.0522033	4.48234	2.75085e-16		183.082	9.89822	294.312	102.331	205.808	9.86727	198.16	5.50696		32.67		202.111	5.548	196.142	1893.18		296.91	11.7952	1330.52	969086	2.39696		27.1912	0.0702768	1.20161	4.19924	0.935603
WS14/03 S 28 7/12/2020 3:01:23 PM (Run: 1)		127.796	116.995	5.29027	0.915484	301.138		0.00815814	6.87837	20.9006	5.93257	0.213584	6.52361	0.0323762	2.71331	0.413904	30.8869	2.71331	0.0478455	5.93257	-2.20722e-16		164.225	11.2502	91.675	140.551	196.556	11.6578	205.403	5.48537		-124.056		196.401	5.58424	211.978	1506.93		191.733	9.5417	1022.56	885027	2.12701	0.0270512	19.809	0.0369709	1.17172	2.19789	0.51587
Experiment on July 10, 2020
Isotope ratio and date errors do not include systematic calibration errors of 0.24% (207Pb/206Pb) and 0.64% (206Pb/238U) (2 sigma).
Trace element concentrations were deleted from analyses known to have intersected inclusions of other minerals based on P and Ti.
Ablation used a laser spot size of 25 microns and a laser firing repetition rate of 5 Hz.
Activity of TiO2 for Ti-in-Zircon temperature calculation is 0.8.
Experiment on July 12, 2020
Isotope ratio and date errors do not include systematic calibration errors of 0.26% (207Pb/206Pb) and 0.76% (206Pb/238U) (2 sigma).
Trace element concentrations were deleted from analyses known to have intersected inclusions of other minerals based on P and Ti.
Ablation used a laser spot size of 25 microns and a laser firing repetition rate of 5 Hz.
Activity of TiO2 for Ti-in-Zircon temperature calculation is 0.8.
WS18/08_M132 7/10/2020 4:47:37 PM (Run: 1)		115.056	67.2341	47.1118	0.584361	11467.9		0.0939513	3.3315	9.27123	1.35469	4.78885	3.22296	0.322009	2.92443	0.905415	3.10551	2.92443	0.107861	1.35469	-2.22826e-16		1814.97	57.8306	1763.59	24.7571	1782.95	27.0722	1799.53	45.919		-2.03777		1777.76	51.6881	1788.12	1045.69		217.748	6.52856	1610.21	782148	3.73772	0.010165	7.74406	0.0845571	2.24294	7.09511	0.641012
WS18/08_S160 7/10/2020 6:06:17 PM (Run: 1)		150.259	60.2114	45.3576	0.400718	983.007		0.0638399	3.94762	11.408	1.23057	3.09291	3.27641	0.255903	3.03654	0.924927	3.90773	3.03654	0.0876578	1.23057	-2.35938e-16		1250.83	47.8811	1374.98	23.6655	1430.94	25.1399	1468.85	39.8857		-6.827		1425.03	43.3403	1469.95	777.991		183.825	13.6105	749.349	911364	5.2883		9.15531	0.0229718	1.14871	2.22425	0.275547
WS18/08_S148 7/10/2020 5:34:52 PM (Run: 1)		78.5629	64.4166	25.2909	0.819937	618.284		0.0674453	3.47049	11.1122	1.96388	3.08179	3.36707	0.248371	2.73502	0.810278	4.02623	2.73502	0.0899913	1.96388	-1.62851e-16		1319.21	44.3209	1425.33	37.5078	1428.17	25.8128	1430.07	35.0781		-0.332692		1416.52	37.8727	1420.97	1709.85		222.867	17.8869	1417.64	880419	3.06547		9.53043	0.17482	2.80408	7.34207	0.760077
WS18/08_S151 7/10/2020 5:40:44 PM (Run: 1)		291.543	169.845	65.0045	0.582573	2321.68		0.0495801	2.42572	13.3256	1.38077	1.86958	2.90998	0.180688	2.56154	0.877779	5.5344	2.56154	0.0750435	1.38077	-2.50906e-16		978.069	23.1603	1069.66	27.7475	1070.38	19.2506	1070.73	25.2704		-0.0999954		1069.82	26.4657	1077.51	1219.27		234.099	12.3199	2391.11	873139	3.81013	0.0175208	10.1897	0.191191	5.32763	14.039	0.945066
WS18/08_S146 7/10/2020 5:23:00 PM (Run: 1)		179.561	182.269	17.9401	1.01508	651.843		0.0212334	4.86581	17.5019	2.1534	0.594547	3.39699	0.0754692	2.62724	0.771334	13.2504	2.62724	0.0571367	2.1534	1.54188e-16		424.68	20.4485	496.818	47.4458	473.767	12.8609	469.022	11.8848		5.59476		467.076	12.0676	467.178	2661.91		271.818	6.6102	1859.59	903935	6.56405		19.9738	0.0777783	1.99466	6.08628	0.853739
WS18/08_S142 7/10/2020 5:15:11 PM (Run: 1)		158.446	172.484	15.3774	1.0886	842.55		0.0202462	3.16666	18.4902	3.76369	0.540878	4.58985	0.0725338	2.62703	0.570825	13.7867	2.62703	0.0540826	3.76369	-1.76264e-16		405.132	12.7014	374.47	84.7094	439.003	16.3591	451.403	11.4528		-20.5444		432.076	11.7088	450.282	2830.46		439.969	8.42022	4226.66	919850	2.27923	0.167381	14.6631	1.17586	15.466	29.7522	5.61233
WS18/08_S144 7/10/2020 5:19:05 PM (Run: 1)		57.7535	87.0517	5.77394	1.5073	82.9201		0.0185798	2.88062	17.4088	5.81059	0.55134	6.76941	0.0696124	3.47303	0.512263	14.3653	3.47303	0.0574423	5.81059	0		372.092	10.6205	508.521	127.77	445.874	24.4283	433.82	14.5709		14.6899		438.003	14.8222	439.141	3757.03		360.372	22.7131	1360.22	889581	1.1634		12.6863	0.107164	2.9615	7.41209	1.6702
WS18/08_S154 7/10/2020 5:46:36 PM (Run: 1)		246.009	487.761	24.1944	1.9827	594.183		0.0172485	3.49082	18.1145	3.39639	0.471095	4.55416	0.0618919	3.03397	0.664858	16.1572	3.03397	0.0552044	3.39639	0		345.656	11.9637	420.485	75.8284	391.945	14.8083	387.121	11.3994		7.93464		386.247	11.5518	394.657	6224.17		374.9	6.91799	4635.31	864906	2.09683	0.0861596	40.8622	0.610216	13.1145	20.5937	6.93898
WS18/08_S153 7/10/2020 5:44:38 PM (Run: 1)		441.608	413.795	35.4961	0.937019	12267.9		0.0175846	3.40214	18.6126	2.24335	0.454766	3.23104	0.0613894	2.3253	0.717214	16.2895	2.3253	0.0537272	2.24335	0		352.334	11.883	359.594	50.6241	380.612	10.2558	384.069	8.66994		-6.80654		376.705	8.79805	383.865	2393.89		292.74	8.14286	2114.52	853533	4.60465	0.00504304	29.1426	0.238005	3.87928	7.61877	2.17015
WS18/08_S149 7/10/2020 5:36:50 PM (Run: 1)		158.32	160.536	12.8292	1.014	1694.98		0.0176026	4.20573	19.1802	3.29488	0.440298	3.82729	0.061249	1.94728	0.506308	16.3268	1.94728	0.052137	3.29488	-1.35728e-16		352.691	14.7046	291.458	75.2582	370.462	11.88	383.217	7.24482		-31.4826		364.196	7.40111	380.007	2755.17		160.027	6.05781	535.875	891201	1.03705	0.0179837	17.5682	0.0422094	1.08169	1.88084	0.72835
WS18/08_S138 7/10/2020 5:07:23 PM (Run: 1)		551.233	154.815	38.112	0.280852	2768.74		0.019817	7.73224	16.869	4.26723	0.494753	4.84338	0.0605307	2.29107	0.471368	16.5205	2.29107	0.0592804	4.26723	-3.60302e-16		396.626	30.3692	577.387	92.742	408.144	16.2779	378.852	8.42965		34.385		405.748	8.52866	374.826	366.397		860.704	7.46651	4105.57	919860	1.35939		2.36498	0.0905739	2.91556	8.48565	0.364999
WS18/08_M133 7/10/2020 4:49:34 PM (Run: 1)		59.4269	51.7881	3.22167	0.87146	1103.68		0.0128753	8.46296	19.5668	8.42062	0.29495	9.41691	0.041857	4.21561	0.447199	23.8909	4.21561	0.0511069	8.42062	-1.95595e-16		258.576	21.7438	245.662	193.93	262.449	21.7788	264.333	10.9179		-7.60037		257.134	11.0965	258.396	2301.56		191.922	10.1934	725.419	771180	0.635776		10.8396	0.00411797	0.595242	2.23807	0.418968
WS18/08_S159 7/10/2020 6:04:20 PM (Run: 1)		207.277	321.065	12.5061	1.54897	6498.07		0.0113492	4.39874	20.317	4.20473	0.282323	4.97798	0.041601	2.66469	0.533899	24.0379	2.66469	0.0492199	4.20473	1.55299e-16		228.099	9.97708	158.325	98.3936	252.499	11.1284	262.749	6.86068		-65.9554		247.743	6.9714	266.295	4924.67		251.634	19.66	2252.53	921110	0.805417	0.0145126	20.9844	0.53104	8.43139	15.001	2.02033
WS18/08_S152 7/10/2020 5:42:41 PM (Run: 1)		219.755	231.041	11.9142	1.05136	890.335		0.0113959	4.44823	19.334	3.48574	0.292276	4.48724	0.040984	2.82576	0.628275	24.3998	2.82576	0.0517222	3.48574	1.76707e-16		229.034	10.1305	273.146	79.8812	260.349	10.305	258.929	7.17173		5.20485		255.742	7.24444	258.416	2831.67		265.566	13.9691	1101.79	879063	1.03324		14.4266	0.107682	1.43588	3.8271	0.599899
WS18/08_S161 7/10/2020 6:08:14 PM (Run: 1)		328.373	366.929	17.7829	1.11742	908.488		0.0112444	3.74818	20.0741	2.87643	0.277209	4.20532	0.0403592	3.06771	0.728048	24.7775	3.06771	0.0498154	2.87643	1.97603e-16		226.005	8.4239	186.362	66.9656	248.441	9.26774	255.059	7.6717		-36.8622		244.267	7.76091	255.345	3068.18		250.278	12.827	1470.86	920668	1.3378	0.0139491	21.0026	0.0624101	2.68255	5.58646	1.41527
WS18/08_S141 7/10/2020 5:13:14 PM (Run: 1)		311.304	467.384	17.654	1.50137	424.091		0.0101162	3.83524	19.182	2.14214	0.289075	3.92899	0.0402164	3.29366	0.83687	24.8655	3.29366	0.0521322	2.14214	0		203.443	7.76337	291.191	48.9321	257.831	8.9463	254.174	8.20875		12.712		253.636	8.26523	262.793	4406.52		252.824	18.4067	1986.52	923396	0.84052		18.5195	0.26938	4.60316	8.83547	1.42027
WS18/08_S143 7/10/2020 5:17:08 PM (Run: 1)		230.123	243.513	12.1253	1.05819	414.574		0.0109901	4.47118	18.9329	3.83936	0.289782	4.58439	0.0397912	2.5052	0.544854	25.1312	2.5052	0.0528181	3.83936	3.62032e-16		220.923	9.82407	320.981	87.2348	258.388	10.4585	251.539	6.18018		21.6343		253.976	6.23992	251.46	2563.76		163.335	13.6274	698.361	911000	1.02927		14.7487	0.0578654	1.13132	2.16222	0.619834
WS18/08_S137 7/10/2020 4:57:26 PM (Run: 1)		150.418	168.077	7.77362	1.1174	808.601		0.00973177	4.02941	19.9067	4.91704	0.275039	5.98336	0.0397094	3.40931	0.568893	25.1829	3.40931	0.0502342	4.91704	-2.07364e-16		195.749	7.84946	205.865	114.063	246.715	13.1053	251.032	8.39395		-21.9402		241.918	8.50307	255.722	3128.9		169.705	5.77736	1270.62	930233	0.440453	0.0229147	14.3798	0.266239	4.41287	7.43635	2.59034
WS18/08_S139 7/10/2020 5:09:20 PM (Run: 1)		132.645	106.934	6.3296	0.806173	18466.6		0.00995114	7.38653	19.0917	3.59909	0.278501	4.43593	0.0385629	2.59307	0.582956	25.9316	2.59307	0.0523788	3.59909	-3.72357e-16		200.14	14.7104	301.967	82.0538	249.468	9.81161	243.919	6.20683		19.2233		244.731	6.2624	243.965	1955.35		157.633	6.64289	496.129	948622	0.611141		9.0305	0.0195148	0.293134	0.919226	0.470981
WS18/08_S155 7/10/2020 5:48:33 PM (Run: 1)		491.721	351.354	23.0907	0.71454	551.344		0.0105641	2.42146	19.5399	2.96613	0.268763	3.58353	0.0380882	2.01091	0.558587	26.2549	2.01091	0.0511774	2.96613	-4.39728e-16		212.404	5.11633	248.822	68.2725	241.704	7.70779	240.972	4.75628		3.15491		238.35	4.80852	240.24	1986.64		75.7085	2.82489	490.807	891685	1.16355	0.0282549	16.5809	0.00154846	0.558131	1.27028	0.3309
WS18/08_S140 7/10/2020 5:11:17 PM (Run: 1)		298.179	474.397	15.4737	1.59098	813.314		0.00922897	3.14729	19.3699	3.25779	0.256895	4.30464	0.0360896	2.81367	0.652111	27.7088	2.81367	0.0516265	3.25779	3.80004e-16		185.682	5.81718	268.901	74.7145	232.162	8.93354	228.549	6.31795		15.0065		228.168	6.36747	236.18	5168.62		221.399	5.91249	1705.34	935295	6.7268		49.2294	0.0369525	1.30133	4.00051	1.60317
WS18/08_S135 7/10/2020 4:53:32 PM (Run: 1)		270.224	353.495	12.9313	1.30816	1490.51		0.00914855	2.84117	19.6854	4.18018	0.244072	4.78577	0.0348467	2.33016	0.485239	28.6972	2.33016	0.0507991	4.18018	-1.78729e-16		184.071	5.20603	231.732	96.5147	221.75	9.53354	220.811	5.05813		4.71313		217.79	5.12018	224.38	3801.8		201.402	13.4323	1176.29	941431	3.2844	0.682133	26.7385	0.2426	2.92867	4.57235	1.2391
WS18/08_S158 7/10/2020 6:02:23 PM (Run: 1)	z3	187.029	182.84	7.77219	0.977606	4343.48		0.0088553	6.05254	20.3587	4.88805	0.217067	5.47778	0.0320511	2.47246	0.449995	31.2001	2.47246	0.049119	4.88805	-1.43807e-16		178.197	10.738	153.511	114.486	199.466	9.92006	203.373	4.94983		-32.4811		195.481	5.0226	202.639	1841.62		254.108	10.1251	2257.12	894491	2.60834	0.0180943	8.77691	0.135676	2.60346	6.57513	1.25375
WS18/08_S134 7/10/2020 4:51:35 PM (Run: 1)	z1	259.408	373.256	11.7483	1.43888	294.099		0.00842836	4.275	19.7785	5.12995	0.224642	5.73796	0.0322243	2.57057	0.446743	31.0325	2.57057	0.05056	5.12995	0		169.641	7.22182	220.844	118.677	205.766	10.6873	204.454	5.17318		7.42147		201.98	5.24042	208.803	3800.92		300.029	19.7653	2230.6	925712	5.26924	0.0142114	22.7285	0.137793	3.23082	6.48098	1.70686
WS18/08 S 1 7/12/2020 1:52:10 PM (Run: 1)	z1	199.441	234.1	8.34981	1.17378	407.688		0.00801099	3.04935	19.212	4.86902	0.221425	6.15147	0.030853	3.75942	0.609595	32.4117	3.75942	0.0520509	4.86902	-1.94111e-16		161.274	4.89825	287.685	111.288	203.095	11.3232	195.885	7.25338		31.91		203.252	7.29365	203.328	3407.79		295.939	18.6845	1631.42	878218	4.41219		18.1978	0.0944615	2.6367	4.79819	1.21468
WS18/08_S157 7/10/2020 5:52:27 PM (Run: 1)	z2	267.622	179.945	10.5148	0.672384	9229.63		0.00921167	6.04773	20.2093	4.43742	0.219646	5.25824	0.0321939	2.82106	0.535255	31.0618	2.82106	0.0494821	4.43742	2.77999e-16		185.335	11.1573	170.713	103.604	201.615	9.61521	204.264	5.67207		-19.6538		197.825	5.73799	201.817	1048.23		213.947	4.50722	1444.97	893237	3.29744	0.0685301	13.3522	0.0846278	2.04062	4.74128	0.396663
WS18/08 S 5 7/12/2020 1:59:59 PM (Run: 1)	z2	246.293	176.584	9.50155	0.716967	1795.26		0.00822881	5.05885	20.4342	4.32819	0.210179	4.94857	0.0311492	2.39897	0.48177	32.1036	2.39897	0.0489376	4.32819	1.71106e-16		165.641	8.3453	144.865	101.534	193.703	8.72669	197.736	4.67163		-36.497		193.654	4.73359	201.646	1854.45		213.403	4.52526	1598.4	870436	3.34349		11.4668	0.0901033	1.84935	5.43173	0.297087
WS18/08_S156 7/10/2020 5:50:30 PM (Run: 1)	z4	321.596	363.934	13.6323	1.13165	422.616		0.00836875	3.94057	19.4947	3.20692	0.225916	3.65217	0.0319419	1.74756	0.475601	31.3068	1.74756	0.0512961	3.20692	0		168.446	6.61017	254.144	73.7443	206.821	6.83386	202.69	3.48703		20.2459		203.211	3.52433	204.97	3403.03		192.339	9.00703	2200.02	908690	1.20563	0.0302262	23.6112	0.245192	5.40663	10.1254	3.19231
WS18/08 S 4 7/12/2020 1:58:02 PM (Run: 1)	z4	271.716	297.605	11.5408	1.09528	348.142		0.00843096	5.7911	19.633	2.77665	0.222085	3.83953	0.0316231	2.65183	0.687153	31.6225	2.65183	0.0509346	2.77665	0		169.693	9.78599	237.86	64.0384	203.643	7.08476	200.699	5.24019		15.6234		203.73	5.27325	206.846	3063.96		214.261	7.62611	1946.31	879367	1.32939		19.4429	0.161151	4.06477	9.49992	2.55421
WS18/08_S147 7/10/2020 5:24:57 PM (Run: 1)	z5	271.41	210.197	10.6967	0.774463	836.99		0.00881827	4.88539	20.2683	2.95377	0.21558	3.91441	0.0316901	2.56863	0.654361	31.5556	2.56863	0.0493382	2.95377	-1.147e-16		177.455	8.63142	163.969	69.0476	198.224	7.04889	201.117	5.0862		-22.6556		194.533	5.13448	199.709	1880.22		247.37	3.15096	7546.2	887078	8.98989	0.0355707	19.3567	0.514726	11.5351	29.5501	0.628956
WS18/08 S 2 7/12/2020 1:54:08 PM (Run: 1)	z5	269.756	193.492	10.6997	0.717286	1907.15		0.00892442	5.12743	20.8985	2.36568	0.209396	3.7368	0.0317382	2.89262	0.77078	31.5078	2.89262	0.0478503	2.36568	3.8945e-16		179.582	9.16714	91.9256	56.0435	193.046	6.56946	201.418	5.73616		-119.109		192.919	5.79551	204.096	1913.31		225.557	4.26892	6024.5	819379	17.124	0.0020816	36.5748	0.332338	8.82188	24.8807	0.487668
WS18/08_S150 7/10/2020 5:38:47 PM (Run: 1)	z5	82.967	48.7031	3.09286	0.587018	58.8882		0.00895889	8.96264	17.4484	4.2013	0.244913	5.75714	0.0309932	3.93621	0.682894	32.2651	3.93621	0.0573119	4.2013	0		180.272	16.0853	503.586	92.4588	222.436	11.5003	196.761	7.62794		60.928		218.322	7.60407	193.491	1601.72		180.417	17.9181	998.413	883416	4.92146		4.70493	0.0977863	1.49191	4.65991	0.485708
WS18/08 S 3 7/12/2020 1:56:05 PM (Run: 1)	z5	32.5131	19.8431	1.27212	0.610311	205.124		0.00901565	8.72325	23.9302	11.2263	0.185961	12.0732	0.0322749	4.44212	0.367265	30.9838	4.44212	0.0417882	11.2263	0		181.409	15.754	-239.336	283.488	173.177	19.2223	204.771	8.95321		185.558		172.57	9.20502	207.13	1692.59		139.676	23.1668	771.501	846004	2.6398		1.95164	0.083673	1.65658	4.83174	0.736648
Experiment on July 10, 2020
Isotope ratio and date errors do not include systematic calibration errors of 0.20% (207Pb/206Pb) and 0.70% (206Pb/238U) (2 sigma).
Trace element concentrations were deleted from analyses known to have intersected inclusions of other minerals based on P and Ti.
Ablation used a laser spot size of 25 microns and a laser firing repetition rate of 5 Hz.
Activity of TiO2 for Ti-in-Zircon temperature calculation is 0.8.
Experiment on July 12, 2020
Isotope ratio and date errors do not include systematic calibration errors of 0.26% (207Pb/206Pb) and 0.76% (206Pb/238U) (2 sigma).
Trace element concentrations were deleted from analyses known to have intersected inclusions of other minerals based on P and Ti.
Ablation used a laser spot size of 25 microns and a laser firing repetition rate of 5 Hz.
Activity of TiO2 for Ti-in-Zircon temperature calculation is 0.8.
WS18/09_M216 7/10/2020 4:14:04 PM (Run: 1)		158.272	91.8874	59.9185	0.580565	2441.46		0.0926231	3.2833	9.51477	1.62382	4.25866	3.28376	0.29388	2.85417	0.867206	3.40275	2.85417	0.1051	1.62382	0		1790.42	56.2564	1716.06	29.8527	1685.41	27.0022	1660.89	41.7901		3.21495		1685.64	46.0776	1651.37	744.249		320.37	19.1473	863.241	741403	3.86402	0.457936	19.3214	0.156102	1.84575	2.50143	0.437123
WS18/09_M207 7/10/2020 3:48:17 PM (Run: 1)		461.618	403.805	184.965	0.874759	808095		0.0958757	1.691	9.68541	1.18735	3.87238	3.09731	0.272016	2.86069	0.921517	3.67625	2.86069	0.103248	1.18735	0		1850.5	29.9021	1683.31	21.919	1607.94	24.9949	1551.03	39.4359		7.85865		1652.07	42.754	1600.93	1174.57		430.631	45.0247	5670.54	695869	9.60367	0.259428	34.4868	1.10937	19.5427	33.1679	4.24803
WS18/09_M224 7/10/2020 4:29:43 PM (Run: 1)		124.609	79.5863	39.1253	0.638689	10294.1		0.0708376	2.6705	11.3508	1.2413	3.02173	2.38539	0.248759	2.03698	0.850139	4.01995	2.03698	0.0880998	1.2413	-1.74379e-16		1383.34	35.7063	1384.67	23.8395	1413.12	18.1984	1432.07	26.1581		-3.42337		1407.55	28.2868	1426.31	1293.8		580.78	20.6814	1816.46	779455	2.19075		11.1195	0.0980534	2.61797	7.71447	1.01576
WS18/09_L185 7/10/2020 2:42:09 PM (Run: 1)		108.883	121.449	30.6124	1.11541	2479.8		0.0661317	3.51401	12.2638	3.37315	2.18174	4.57624	0.194056	3.09254	0.674467	5.15315	3.09254	0.0815408	3.37315	0		1294.32	44.0569	1234.52	66.1662	1175.23	31.8623	1143.31	32.3993		7.38846		1167.23	34.0742	1102.8	2698.38
WS18/09_L165 7/11/2020 2:28:14 AM (Run: 1)		24.7532	18.1032	6.36296	0.73135	201.577		0.0787992	6.85741	12.2895	4.29021	2.11434	5.98129	0.188455	4.16772	0.695687	5.3063	4.16772	0.0813701	4.29021	0		1533.06	101.24	1230.41	84.2046	1153.49	41.2319	1113	42.6031		9.54222		1139.03	44.6216	1043.38	49.1439		214.771	24.6697	535.981	772488	2.03		3.465	0.0443552	1.1847	3.18286	0.379586
WS18/09_L183 7/10/2020 2:38:03 PM (Run: 1)		98.8946	117.784	26.4439	1.19101	3598.4		0.0611773	2.59758	12.4295	1.8367	2.02763	3.85607	0.182786	3.39055	0.877851	5.47089	3.39055	0.0804536	1.8367	-1.40486e-16		1200.18	30.2681	1208.13	36.1654	1124.82	26.2217	1082.17	33.7772		10.4255		1114.99	35.157	1042.31	1843.01		311.378	23.3799	2021.99	706352	3.7112	0.168513	9.46167	0.767927	11.8194	20.709	1.27502
WS18/09_L162 7/11/2020 2:22:22 AM (Run: 1)		62.4162	52.7163	16.0743	0.844593	1073.08		0.0695757	4.41116	12.4316	2.63544	2.07856	3.71622	0.187408	2.62007	0.702206	5.33595	2.62007	0.0804402	2.63544	0		1359.51	57.9978	1207.8	51.8955	1141.76	25.4769	1107.32	26.6575		8.31913		1129.46	27.9276	1054.49	31.578		210.814	16.0197	1121.21	782382	3.19268	0.00592463	6.88756	0.14355	3.65977	7.61833	0.266442
WS18/09_L167 7/10/2020 1:58:41 PM (Run: 1)		53.878	39.0232	13.4701	0.724289	194.266		0.065528	3.89594	12.4395	3.18685	2.11676	5.24645	0.190974	4.16764	0.793516	5.23632	4.16764	0.0803888	3.18685	1.31298e-16		1282.87	48.4269	1206.53	62.7651	1154.28	36.1796	1126.65	43.0805		6.62108		1141.87	45.1625	1089.23	630.937		197.697	15.0379	659.08	688128	4.48167		7.14038	0.0557945	1.1631	3.35246	0.233535
WS18/09_L166 7/10/2020 1:56:44 PM (Run: 1)		46.6498	25.1562	11.5514	0.539256	1973.03		0.0658374	3.91965	12.4785	2.83875	2.21195	5.05685	0.200188	4.18488	0.826681	4.9953	4.18488	0.0801375	2.83875	1.46681e-16		1288.74	48.9375	1200.36	55.9595	1184.83	35.3604	1176.33	44.9977		2.00146		1171.56	47.4688	1145.77	736.727		141.796	13.8133	498.146	690658	4.07598	0.0143546	4.83342	0.067497	1.50633	3.95649	0.332346
WS18/09_L173 7/10/2020 2:10:23 PM (Run: 1)		104.418	110.781	30.1596	1.06095	1574.51		0.0701784	4.59404	12.5141	1.91408	2.21499	2.71242	0.201034	1.92185	0.704948	4.97429	1.92185	0.07991	1.91408	1.19212e-16		1370.9	60.8912	1194.78	37.7617	1185.79	18.9748	1180.87	20.7372		1.1639		1177.07	21.9436	1134.59	1587.33		114.865	5.46224	1681.81	716649	12.1109	0.122143	12.167	0.25675	5.52984	10.5265	0.608395
WS18/09_L177 7/10/2020 2:26:21 PM (Run: 1)		46.6251	36.0029	11.7194	0.772178	246.062		0.0580628	5.98541	12.529	2.05105	2.14474	3.44871	0.194891	2.7725	0.801974	5.13108	2.7725	0.0798147	2.05105	0		1140.77	66.3885	1192.41	40.478	1163.36	23.8823	1147.81	29.151		3.74031		1150.54	30.6631	1126.75	1154.58		205.351	15.7197	1341	766524	2.00483	0.0188042	3.99031	0.143785	3.81889	9.65618	1.22834
WS18/09_M219 7/10/2020 4:19:56 PM (Run: 1)		40.3574	15.2188	9.20754	0.377102	377.336		0.0595809	7.45998	12.5398	2.12623	2.13741	3.67325	0.194391	2.99532	0.813762	5.14426	2.99532	0.079746	2.12623	-2.73322e-16		1169.75	84.7857	1190.72	41.9719	1160.99	25.4096	1145.12	31.4262		3.82943		1147.2	33.0429	1121.66	759.247		85.1223	3.60438	417.207	774235	9.13901	0.0255627	5.56416	0.0172802	0.260086	0.671975	0.0198696
WS18/09_L190 7/10/2020 3:00:25 PM (Run: 1)		133.883	145.721	35.6573	1.08842	1249.84		0.0593464	2.27038	12.5469	1.37125	2.07662	3.19409	0.188969	2.88477	0.901142	5.29186	2.88477	0.079701	1.37125	0		1165.27	25.7079	1189.6	27.073	1141.12	21.8907	1115.79	29.5563		6.20474		1133.64	30.9174	1094.09	2466.49		213.015	12.267	2298.45	726637	23.1625	0.0200813	23.487	0.451215	9.02247	17.2777	0.49704
WS18/09_M225 7/10/2020 4:31:40 PM (Run: 1)		42.2472	43.9046	11.4051	1.03923	556.172		0.0578144	3.15411	12.565	3.2675	2.17639	4.29709	0.198335	2.79078	0.647919	5.04198	2.79078	0.0795861	3.2675	-3.81883e-16		1136.02	34.8431	1186.73	64.5389	1173.53	29.8956	1166.37	29.7759		1.71553		1159.77	31.5174	1146.64	2368.85		213.197	21.867	1132.45	812101	2.80228	0.0797266	5.99406	0.262809	5.67694	9.11569	0.575084
WS18/09_L164 7/11/2020 2:26:16 AM (Run: 1)		40.0965	24.5039	9.74154	0.611124	4331.8		0.0732849	5.51182	12.5655	2.53514	2.05537	3.31842	0.187313	2.14125	0.641384	5.33867	2.14125	0.0795831	2.53514	1.60338e-16		1429.48	76.0689	1186.68	50.0733	1134.08	22.6666	1106.8	21.7765		6.73116		1120.59	22.8785	1056.07	25.0942		177.98	22.8139	254.186	794777	1.80643		4.60919	0.142715	2.43207	2.76875	0.284581
WS18/09_M211 7/10/2020 3:56:08 PM (Run: 1)		41.9063	27.4856	10.4478	0.655881	357.22		0.0615192	3.92654	12.5664	2.92007	2.16674	3.94222	0.197478	2.64844	0.670046	5.06387	2.64844	0.0795772	2.92007	-1.12568e-16		1206.69	45.9945	1186.51	57.6784	1170.44	27.3883	1161.76	28.1553		2.08619		1156.69	29.7649	1134.44	1388.09		139.367	13.31	586.822	702558	2.76457	0.00358764	5.32254	0.033739	1.10554	2.86111	0.101175
WS18/09_M197 7/10/2020 3:20:28 PM (Run: 1)		25.9849	13.0492	6.71618	0.502183	439.572		0.0692187	6.94524	12.581	4.11588	2.31982	5.34313	0.211675	3.40714	0.636649	4.72421	3.40714	0.0794847	4.11588	2.48024e-16		1352.76	90.8776	1184.23	81.3244	1218.37	37.9111	1237.74	38.3701		-4.51805		1203.28	41.0158	1204.42	719.149		155.09	17.4299	452.862	672955	2.88921		3.07294	0.0476498	0.962955	2.34457	0.267962
WS18/09_L191 7/10/2020 3:02:23 PM (Run: 1)		61.4735	59.4008	16.4323	0.966283	1762.08		0.0623446	4.20765	12.5909	1.51465	2.13946	3.14263	0.195372	2.75354	0.874042	5.11845	2.75354	0.0794222	1.51465	-2.09097e-16		1222.4	49.9098	1182.69	29.9341	1161.65	21.7457	1150.41	29.0113		2.72946		1149.17	30.5107	1118.07	2119.98		190.79	14.3664	1145.24	735052	2.25216		7.56865	0.114387	2.86918	6.98623	0.561456
WS18/09_L186 7/10/2020 2:52:34 PM (Run: 1)		29.971	29.7094	7.95447	0.991274	294.504		0.064142	5.99138	12.5998	3.52793	2.09038	4.82403	0.191024	3.29014	0.68086	5.23494	3.29014	0.0793662	3.52793	0		1256.57	72.9931	1181.27	69.738	1145.65	33.1324	1126.92	34.0173		4.60052		1131.24	35.8025	1082.25	1556.86		221.103	23.3303	957.171	690997	1.99611	0.0517188	4.53098	0.326707	5.38505	8.51675	1.00012
WS18/09_L169 7/10/2020 2:02:35 PM (Run: 1)		75.3446	54.9769	18.5106	0.729673	284.249		0.0660503	3.74023	12.6413	2.02019	2.02878	4.26502	0.186005	3.75623	0.879536	5.37621	3.75623	0.0791059	2.02019	-4.60639e-16		1292.78	46.8391	1174.79	39.9712	1125.21	29.008	1099.7	37.9759		6.39214		1114.45	39.6934	1060.99	1563.59
WS18/09_L179 7/10/2020 2:30:15 PM (Run: 1)		106.655	76.1671	27.0385	0.714145	666.124		0.0610548	3.7933	12.6465	1.86906	2.14822	3.61189	0.197037	3.09069	0.854029	5.0752	3.09069	0.0790732	1.86906	0		1197.84	44.1176	1173.98	36.9852	1164.48	25.0252	1159.38	32.7954		1.24335		1155.71	34.5524	1140.53	1498.41		201.52	9.01108	664.546	692674	5.38101		12.3526	0.0232681	0.826408	2.18689	0.213941
WS18/09_M202 7/10/2020 3:30:20 PM (Run: 1)		48.0664	20.3901	11.9279	0.424207	3419.38		0.0762331	5.86138	12.6524	2.51678	2.22068	3.67598	0.203778	2.67929	0.726986	4.90731	2.67929	0.0790365	2.51678	0		1484.93	83.9169	1173.06	49.8092	1187.58	25.736	1195.58	29.2381		-1.92009		1174.54	31.0234	1157.19	769.306		72.3486	4.79258	539.03	702295	6.08881		6.26109	0.0223783	0.949434	2.82329	0.0999965
WS18/09_L168 7/10/2020 2:00:38 PM (Run: 1)		143.251	95.8199	35.6488	0.668893	947.742		0.0659434	1.79994	12.6965	1.46693	2.07793	3.22746	0.191343	2.87482	0.888719	5.22621	2.87482	0.0787619	1.46693	0		1290.75	22.5065	1166.15	29.0613	1141.55	22.1239	1128.65	29.765		3.21615		1136.13	31.2316	1103.84	958.245		182.276	8.64936	822.54	708393	6.56485		14.7109	0.0512239	1.34421	4.34912	0.139627
WS18/09_M208 7/10/2020 3:50:14 PM (Run: 1)		81.266	71.4075	21.4504	0.878689	1740.03		0.0650077	3.14577	12.7067	2.14441	2.11444	2.95839	0.194862	2.03803	0.685833	5.13183	2.03803	0.0786985	2.14441	0		1273	38.8107	1164.57	42.4921	1153.53	20.3939	1147.66	21.4259		1.45237		1142.52	22.6242	1112.28	1308.29		186.722	14.7043	1606.09	710903	2.55992	0.037072	7.32836	0.32673	7.40647	13.3006	1.15497
WS18/09_M217 7/10/2020 4:16:02 PM (Run: 1)		63.58	76.9698	18.0007	1.2106	515.299		0.0605214	1.94722	12.7079	2.17212	2.14879	3.51374	0.198046	2.76194	0.784135	5.04932	2.76194	0.0786912	2.17212	-1.45429e-16		1187.68	22.4604	1164.4	43.042	1164.66	24.3473	1164.82	29.4324		-0.0354247		1152.39	31.0846	1138.11	1655.04		148.938	17.6534	1082.95	753372	5.24205	0.0436767	14.348	0.419044	7.73926	13.3986	0.342146
WS18/09_L176 7/10/2020 2:24:23 PM (Run: 1)		214.524	114.562	52.0362	0.534026	1878.44		0.0604274	3.29246	12.7127	1.05566	2.11216	3.21576	0.194743	3.03754	0.942671	5.13497	3.03754	0.0786616	1.05566	2.77291e-16		1185.89	37.9215	1163.64	20.9212	1152.78	22.1604	1147.02	31.9174		1.42875		1153.59	33.5461	1145.36	723.691		226.032	6.21	1147.84	730625	11.7596		16.0909	0.0650608	1.56451	4.53282	0.202987
WS18/09_M227 7/10/2020 4:41:45 PM (Run: 1)		85.3897	67.2718	21.6776	0.787821	1.94321e+06		0.0570661	5.99048	12.7176	1.90471	2.13348	3.35185	0.196785	2.75807	0.820853	5.08169	2.75807	0.0786312	1.90471	0		1121.72	65.3657	1162.88	37.7517	1159.71	23.1726	1158.03	29.2347		0.417762		1148.81	30.8316	1143.51	202.403		79.4325	2.38564	4635.88	793407	7.31786	0.0281965	23.8908	0.304645	6.50615	16.4422	1.55474
WS18/09_L182 7/10/2020 2:36:07 PM (Run: 1)		91.1904	68.3269	22.9522	0.749277	2978.48		0.0637972	2.76762	12.7176	2.86028	2.08046	4.5587	0.191895	3.54972	0.777518	5.21117	3.54972	0.0786309	2.86028	-1.72342e-16		1250.02	33.5477	1162.87	56.6915	1142.39	31.2618	1131.63	36.8416		2.68627		1132.23	38.7499	1101.49	1474.78		172.959	12.7013	1079.27	705620	9.0677	0.0310223	13.6013	0.154907	3.36936	8.72213	0.39518
WS18/09_M213 7/10/2020 4:00:03 PM (Run: 1)		42.2084	30.8561	10.7797	0.73104	104.089		0.0653186	4.02547	12.7197	2.95691	2.12897	4.46681	0.196401	3.348	0.748291	5.09161	3.348	0.0786184	2.95691	0		1278.9	49.8869	1162.54	58.6102	1158.25	30.86	1155.96	35.43		0.565731		1144.54	37.407	1119.68	1046.64		194.567	16.2922	635.722	728711	3.48759		6.12559	0.0737126	1.4725	3.22259	0.177827
WS18/09_M198 7/10/2020 3:22:25 PM (Run: 1)		68.8588	42.1484	17.1325	0.612099	974.586		0.0685169	2.99172	12.7263	1.47787	2.1122	3.21454	0.194956	2.85467	0.886031	5.12937	2.85467	0.0785772	1.47787	0		1339.49	38.7749	1161.5	29.2978	1152.79	22.1522	1148.17	30.0234		1.14812		1141.65	31.598	1112.88	917.443		178.857	13.0822	789.827	674817	4.40753		7.2374	0.0563412	1.62768	4.49467	0.255012
WS18/09_M203 7/10/2020 3:32:18 PM (Run: 1)		70.7219	34.0102	16.9891	0.480901	592.535		0.0683749	5.08155	12.752	1.71776	2.11279	3.54455	0.195404	3.10051	0.873041	5.1176	3.10051	0.0784189	1.71776	3.28172e-16		1336.8	65.7328	1157.53	34.0729	1152.99	24.4285	1150.58	32.6716		0.599739		1141.92	34.4091	1119.94	703.518		129.302	9.06945	456.892	671112	3.76636		6.58654	0.0308079	0.719285	1.5588	0.0990774
WS18/09_L187 7/10/2020 2:54:32 PM (Run: 1)		30.0048	29.6926	8.32165	0.989595	105.539		0.0628579	4.63433	12.76	3.96273	2.20245	5.0608	0.203824	3.14778	0.620825	4.90619	3.14778	0.0783699	3.96273	-1.39389e-16		1232.16	55.3967	1156.27	78.6187	1181.82	35.3405	1195.83	34.357		-3.42157		1166.86	36.5956	1163.88	1504.43		268.744	29.4691	1158.93	727485	1.17431		5.59159	0.332366	7.21761	12.2437	2.06938
WS18/09_L192 7/10/2020 3:04:21 PM (Run: 1)		71.2343	41.7625	17.6334	0.58627	935.677		0.0613868	4.03301	12.767	2.65264	2.15434	3.83562	0.199482	2.77046	0.720551	5.01299	2.77046	0.0783268	2.65264	0		1204.17	47.1458	1155.18	52.6356	1166.45	26.5994	1172.54	29.7016		-1.50263		1154.93	31.4543	1150.71	822.445		189.311	14.101	620.905	747216	2.06658		6.60715	0.0188097	0.933933	1.99253	0.342282
WS18/09_M212 7/10/2020 3:58:05 PM (Run: 1)		97.1689	56.5975	23.6761	0.582465	420.523		0.0629138	3.56009	12.7689	2.14827	2.10286	3.35013	0.194743	2.57067	0.765186	5.13498	2.57067	0.0783154	2.14827	3.17095e-16		1233.22	42.5913	1154.87	42.6298	1149.74	23.0537	1147.02	27.0116		0.680024		1140	28.4847	1123.74	610.291		188.801	12.5782	861.993	708465	5.20128		9.01359	0.056608	1.53823	4.49094	0.280522
WS18/09_M220 7/10/2020 4:21:53 PM (Run: 1)		523.085	468.059	132.477	0.894805	10331		0.0575838	1.46848	12.7747	1.01745	1.96133	2.81986	0.181719	2.6299	0.930147	5.50299	2.6299	0.0782794	1.01745	0		1131.61	16.1609	1153.96	20.1927	1102.34	18.9636	1076.36	26.0702		6.72468		1122.16	27.1522	1102.13	1995.89		188.159	4.41827	5770.4	774456	101.177		48.5802	0.215977	4.95388	13.7104	0.372731
WS18/09_L175 7/10/2020 2:14:18 PM (Run: 1)		91.5083	60.7197	22.4285	0.663542	3676.71		0.0592622	3.61037	12.786	1.25587	2.08708	2.57259	0.193542	2.24522	0.86951	5.16685	2.24522	0.0782103	1.25587	0		1163.67	40.8262	1152.22	24.9308	1144.57	17.6601	1140.53	23.47		1.01413		1135.05	24.6929	1122.39	963.277		137.034	10.4327	1317.49	726269	12.2294	0.0194447	16.9663	0.244133	4.50407	7.25082	0.860803
WS18/09_L196 7/10/2020 3:18:25 PM (Run: 1)		86.2915	52.813	21.1713	0.612031	2073.9		0.0601867	3.68968	12.7919	1.8556	2.11515	3.49391	0.196234	2.96043	0.84552	5.09597	2.96043	0.0781747	1.8556	-1.59341e-16		1181.3	42.337	1151.33	36.8407	1153.76	24.0881	1155.06	31.3062		-0.323785		1143.76	33.0122	1136.11	861.881		110.951	10.1292	1110.26	746116	7.3213	0.00875703	9.00889	0.136978	3.08479	6.55524	0.331562
WS18/09_L181 7/10/2020 2:34:10 PM (Run: 1)		280.714	222.602	72.439	0.792987	810.29		0.061818	1.53739	12.8057	1.39191	2.07351	3.59581	0.19258	3.31549	0.920478	5.19265	3.31549	0.0780899	1.39191	0		1212.37	18.0909	1149.19	27.6431	1140.09	24.6319	1135.34	34.5135		1.2054		1144.77	36.2533	1134.34	1530.81		254.84	6.44073	1925.55	696867	2.62605		19.1761	0.0733886	2.21981	8.27936	0.560373
WS18/09_L195 7/10/2020 3:10:16 PM (Run: 1)		54.2985	27.8453	12.9016	0.512818	539.627		0.0588691	4.06181	12.8652	2.39907	2.10023	3.17555	0.195967	2.08053	0.652362	5.1029	2.08053	0.077729	2.39907	-1.74757e-16		1156.16	45.6433	1139.98	47.7099	1148.88	21.8435	1153.62	21.9763		-1.19663		1136.5	23.2753	1133.13	719.146		122.119	13.7815	431.733	744559	2.65708	0.0513607	4.7928	0.0592456	0.663377	1.77312	0.230568
WS18/09_L170 7/10/2020 2:04:32 PM (Run: 1)		358.485	471.463	100.195	1.31515	2514.03		0.0622781	2.02991	12.8671	0.938893	1.93529	3.92728	0.180604	3.8134	0.969752	5.53698	3.8134	0.0777174	0.938893	-5.03659e-16		1221.13	24.054	1139.65	18.6727	1093.37	26.2916	1070.27	37.6057		6.08789		1103.63	39.1685	1056.61	3073.27		252.663	9.65507	9024.77	700337	27.1044	0.177158	40.5667	1.78696	35.8882	66.0338	2.03305
WS18/09_M199 7/10/2020 3:24:23 PM (Run: 1)		77.0083	83.0204	21.4223	1.07807	4923		0.0671737	2.63763	12.8698	2.55205	2.07773	3.93654	0.193936	2.99722	0.759815	5.15634	2.99722	0.0777016	2.55205	-1.14315e-16		1314.07	33.5576	1139.25	50.7582	1141.49	26.9838	1142.66	31.3845		-0.299157		1130.84	33.1106	1095.41	2431.25		153.287	17.7848	1161.31	680806	8.29566	0.0206145	16.0555	0.427109	6.81884	12.6163	0.337703
WS18/09_M222 7/10/2020 4:25:47 PM (Run: 1)		85.3795	76.8494	21.9227	0.900092	1158.03		0.0581848	3.38189	12.8796	2.42421	2.0634	3.38016	0.192745	2.35556	0.694559	5.18821	2.35556	0.0776424	2.42421	0		1143.1	37.5855	1137.76	48.2256	1136.75	23.1178	1136.23	24.5384		0.134848		1125.83	25.9047	1116.44	1353.72		127.78	12.6565	1284.36	793433	9.30222	0.00513588	15.9797	0.182768	4.49232	9.84899	0.375244
WS18/09_M210 7/10/2020 3:54:10 PM (Run: 1)		42.7828	35.509	11.1468	0.829984	28455.3		0.0656935	4.02178	12.9175	3.18634	2.08221	4.31053	0.195075	2.90309	0.67201	5.12625	2.90309	0.0774144	3.18634	-1.88236e-16		1286.01	50.1096	1131.89	63.4423	1142.96	29.5681	1148.81	30.5481		-1.49462		1129.31	32.3323	1108.63	1867.5		189.572	16.6829	831.187	712734	3.60928	0.0142505	6.1646	0.125121	2.73212	5.02505	0.522813
WS18/09_M215 7/10/2020 4:03:59 PM (Run: 1)		162.233	241.137	49.4329	1.48636	845.674		0.0624308	2.21583	12.92	1.90446	2.11482	3.53653	0.198169	2.97995	0.840865	5.04619	2.97995	0.0773991	1.90446	0		1224.04	26.3176	1131.51	37.9211	1153.65	24.3808	1165.48	31.772		-3.00226		1148.4	33.5819	1141.5	2342.69		233.114	7.3365	7464.16	737707	12.6168	0.180293	28.0521	2.63216	49.4352	77.7335	3.57635
WS18/09_L180 7/10/2020 2:32:13 PM (Run: 1)		127.252	19.6456	28.0247	0.154384	1045.68		0.0664329	8.55662	12.9418	2.2869	2.09846	3.82457	0.196967	3.06552	0.799944	5.07699	3.06552	0.077269	2.2869	0		1300.03	107.737	1128.14	45.559	1148.3	26.3007	1159.01	32.5188		-2.73569		1141.05	34.3723	1144.81	298.8		113.585	2.92302	425.617	696345	13.7385		7.30504	0.00668697	0.220941	0.866703
WS18/09_L171 7/10/2020 2:06:29 PM (Run: 1)		98.5176	45.285	23.2742	0.459664	38222.1		0.0639492	4.11098	12.9893	1.80941	2.06583	3.82195	0.194617	3.3665	0.879379	5.1383	3.3665	0.0769862	1.80941	1.43895e-16		1252.9	49.9427	1120.84	36.0853	1137.55	26.1494	1146.34	35.3548		-2.27472		1128.5	37.2862	1124.83	937.314		132.834	4.36637	368.995	706267	3.81814	0.00170378	7.17528		0.399471	0.920201	0.0499817
WS18/09_M226 7/10/2020 4:39:47 PM (Run: 1)		60.3474	48.5595	15.4186	0.804667	3964.92		0.0582783	4.40129	13.0093	2.25418	2.09072	3.44656	0.197264	2.60719	0.754408	5.06936	2.60719	0.0768683	2.25418	1.48405e-16		1144.88	48.9892	1117.79	44.9756	1145.76	23.6729	1160.6	27.6916		-3.83018		1133.25	29.3203	1141.05	1798.4		203.906	17.3927	838.307	811154	2.84889		5.87479	0.0470469	1.39721	4.33058	0.543563
WS18/09_L178 7/10/2020 2:28:18 PM (Run: 1)		33.1315	29.5211	8.43285	0.89103	713.537		0.060169	4.64434	13.0137	3.25809	2.01747	4.36037	0.190417	2.89788	0.663118	5.25163	2.89788	0.0768423	3.25809	1.84349e-16		1180.96	53.2763	1117.08	65.0137	1121.41	29.6018	1123.63	29.8817		-0.586747		1107.67	31.5584	1092.44	1267.98		200.299	20.9564	641.566	747661	2.53543		7.54519	0.0348913	1.36322	3.05317	0.433317
WS18/09_M209 7/10/2020 3:52:12 PM (Run: 1)		77.2168	46.4532	18.8069	0.601594	322.016		0.0644482	3.81168	13.0284	2.13733	2.04595	3.30249	0.193323	2.5176	0.760109	5.17269	2.5176	0.0767555	2.13733	0		1262.38	46.6461	1114.84	42.6633	1130.95	22.5239	1139.35	26.2924		-2.19888		1119.81	27.7637	1110.4	1257.94		168.253	12.1692	806.112	714618	5.23485	0.0111805	8.07104	0.0704066	1.62112	4.28968	0.387826
WS18/09_M214 7/10/2020 4:02:01 PM (Run: 1)		59.1916	35.4299	14.983	0.598564	11775.6		0.0647995	3.78412	13.0852	3.31684	2.13605	4.35269	0.202718	2.8186	0.646048	4.93297	2.8186	0.076422	3.31684	1.86638e-16		1269.05	46.5459	1106.15	66.2923	1160.55	30.1035	1189.9	30.6253		-7.57115		1148.02	32.6501	1162.29	1308.95		162.889	10.615	457.196	711351	3.10177		7.24146	0.0228587	0.786984	1.478	0.10418
WS18/09_M223 7/10/2020 4:27:45 PM (Run: 1)		241.188	90.0332	52.461	0.373291	39148.4		0.053953	3.97805	13.1127	1.18753	1.92871	2.50078	0.183425	2.20083	0.876703	5.45181	2.20083	0.0762618	1.18753	-3.39761e-16		1062.11	41.1602	1101.93	23.75	1091.09	16.7223	1085.66	21.9899		1.47624		1091	23.0304	1086.65	512.88		211.028	7.80352	934.115	798693	4.67612		8.87694	0.0423952	0.733452	3.36166	0.205155
WS18/09_L194 7/10/2020 3:08:19 PM (Run: 1)		50.2311	45.4975	13.2819	0.905763	434.101		0.0613278	3.5643	13.1233	2.14263	2.07797	3.95814	0.197779	3.32807	0.839407	5.05615	3.32807	0.0762005	2.14263	2.44448e-16		1203.04	41.6289	1100.35	42.8607	1141.56	27.1329	1163.38	35.4253		-5.72765		1128.53	37.5091	1135.43	1327.68		216.552	14.4974	1147.49	744663	2.74048		6.74746	0.151834	3.4563	7.54273	0.445914
WS18/09_L184 7/10/2020 2:40:01 PM (Run: 1)		192.926	131.987	49.2163	0.684133	2735.29		0.0626456	3.16965	13.2053	1.0772	2.06539	2.67039	0.19781	2.44348	0.912176	5.05535	2.44348	0.0757271	1.0772	0		1228.12	37.7681	1087.88	21.5881	1137.41	18.2692	1163.55	26.0129		-6.95566		1135.44	27.5268	1154.25	969.462		217.253	8.02192	1343.6	696713	39.5217	0.00628685	21.8206	0.143329	2.79616	6.69402	0.7444
WS18/09_L193 7/10/2020 3:06:21 PM (Run: 1)		39.4976	32.4189	10.079	0.820782	496.248		0.0620946	4.24217	13.3071	3.87538	2.00806	4.90332	0.193801	3.00399	0.611383	5.15992	3.00399	0.0751481	3.87538	-1.49547e-16		1217.64	50.1293	1072.49	77.8449	1118.24	33.2361	1141.93	31.437		-6.47555		1104.5	33.4052	1109.4	1181.36		120.575	16.1697	1728.63	737883	2.24452	0.125138	4.7234	0.761568	10.751	15.7566	1.64189
WS18/09_M204 7/10/2020 3:34:16 PM (Run: 1)		122.771	69.6814	28.4035	0.567571	2127.7		0.0636168	3.13841	13.3618	1.56784	1.89651	3.27136	0.183789	2.87118	0.8757	5.44101	2.87118	0.07484	1.56784	-1.95009e-16		1246.59	37.941	1064.21	31.5326	1079.87	21.749	1087.64	28.7359		-2.20161		1072.07	30.1778	1062.13	612.473		285.049	18.9372	1415.47	693559	2.27784	0.000563874	6.44904	0.169047	4.17666	9.29964	1.09015
WS18/09_M205 7/10/2020 3:36:13 PM (Run: 1)		203.92	72.7056	45.7944	0.35654	1194.2		0.0655541	4.19404	13.5114	1.13507	1.91456	2.96739	0.187615	2.74172	0.921674	5.33008	2.74172	0.0740117	1.13507	0		1283.37	52.1518	1041.78	22.906	1086.17	19.7925	1108.44	27.921		-6.39907		1084.98	29.412	1098.22	487.21
WS18/09_M221 7/10/2020 4:23:50 PM (Run: 1)		159.768	123.438	7.31236	0.772608	312.331		0.0114088	4.43	19.5683	3.1122	0.253072	4.04314	0.0359167	2.58093	0.636578	27.8422	2.58093	0.051103	3.1122	0		229.29	10.1002	245.489	71.6774	229.069	8.29119	227.473	5.76854		7.33899		224.76	5.81943	221.889	1892.41		184.931	14.8187	485.066	791098	1.21893		8.96081	0.0105753	0.59177	1.49905	0.565872
WS18/09_L163 7/11/2020 2:24:19 AM (Run: 1)		284.226	254.726	13.6194	0.896208	754.217		0.0133746	4.87273	19.5666	5.01678	0.245645	5.6297	0.0348596	2.55449	0.451838	28.6865	2.55449	0.0511075	5.01678	0		268.537	12.9985	245.657	115.54	223.033	11.2727	220.891	5.54707		10.0814		219.189	5.61975	208.608	6.86239		254.081	25.9146	1177.04	796192	2.08597	0.0972859	14.6965	0.378649	7.10596	9.68623	2.13208
WS18/09_M228 7/10/2020 4:43:42 PM (Run: 1)		161.412	133.542	7.03592	0.827338	3586.37		0.0101346	5.3265	19.4916	4.42755	0.242053	4.90857	0.0342181	2.11916	0.429952	29.2243	2.11916	0.0513042	4.42755	1.85278e-16		203.811	10.8015	254.561	101.803	220.1	9.71302	216.894	4.51987		14.7968		215.929	4.5813	213.544	2305.53		185.199	11.1496	1282.79	823170	1.14316		13.8323	0.167637	3.72672	7.49253	1.77768
WS18/09_M201 7/10/2020 3:28:23 PM (Run: 1)		61.9482	98.0097	3.32384	1.58212	562.994		0.0118409	5.38317	19.3633	8.18739	0.241997	9.08544	0.033985	3.93852	0.43298	29.4247	3.93852	0.0516441	8.18739	-4.30602e-16		237.925	12.7328	269.707	187.741	220.054	17.9748	215.441	8.34497		20.1203		215.602	8.45321	202.051	4567.8		116.937	13.0425	3575.06	681652	1.79162	0.0470838	42.854	0.897639	18.8631	33.351	15.5059
WS18/09_M218 7/10/2020 4:17:59 PM (Run: 1)		117.164	92.6952	5.12633	0.791155	171.326		0.0112499	7.45242	19.9387	6.08869	0.234691	6.81169	0.0339384	3.05402	0.447463	29.4651	3.05402	0.0501537	6.08869	-1.86835e-16		226.116	16.7572	202.124	141.34	214.063	13.1469	215.15	6.46231		-6.44466		209.776	6.55429	208.362	1383.95		115.454	9.111	1415.9	773153	3.63685		24.2124	0.0736113	1.58688	4.48223	2.5904
WS18/09_L172 7/10/2020 2:08:26 PM (Run: 1)		460.792	150.719	17.8603	0.327087	416.8		0.0118107	3.35244	19.9605	1.85837	0.233095	3.91183	0.0337444	3.44222	0.878561	29.6345	3.44222	0.050099	1.85837	-1.36736e-16		237.321	7.90951	199.613	43.1587	212.75	7.50837	213.941	7.24345		-7.17789		209.814	7.29513	209.37	808.043		87.5538	1.40162	716.269	692635	4.84824		19.0285	0.0146804	0.340833	0.954743	0.563229
WS18/09_M229 7/10/2020 4:45:39 PM (Run: 1)		347.906	435.249	16.4028	1.25105	330.585		0.0101019	3.93634	19.4163	2.59409	0.237394	3.7719	0.0334298	2.73824	0.724169	29.9135	2.73824	0.0515032	2.59409	-1.22754e-16		203.157	7.95689	263.444	59.551	216.284	7.3477	211.978	5.71007		19.5356		212.803	5.74446	209.326	3499.76		242.065	6.11293	1639.2	813578	3.66648		34.3823	0.0444312	1.71565	4.64859	1.59203
WS18/09_L188 7/10/2020 2:56:30 PM (Run: 1)		271.157	111.358	10.5323	0.410678	388.221		0.0112457	6.77599	20.1938	3.26654	0.227103	5.07346	0.0332613	3.88198	0.76421	30.065	3.88198	0.0495202	3.26654	0		226.031	15.2306	172.533	76.2399	207.804	9.53401	210.927	8.05564		-22.2532		204.06	8.1259	205.594	691.224		127.161	3.35033	354.838	714816	1.12847	0.0948849	11.1281	0.0313589	0.3953	0.834688	0.38713
WS18/09_M200 7/10/2020 3:26:25 PM (Run: 1)	z1	62.5346	26.8709	2.35288	0.429697	38.5038		0.0112965	11.1667	17.8046	6.28753	0.24593	7.21299	0.0317573	3.53471	0.489321	31.4888	3.53471	0.0561653	6.28753	6.24745e-16		227.047	25.2118	458.914	139.441	223.265	14.4565	201.537	7.01354		56.0839		219.054	7.03943	194.901	1065.42		123.613	4.28083	311.126	677279	0.594437		5.43807	0.0531757	0.458645	1.00252	0.469711
WS18/09 M 7 7/12/2020 2:03:57 PM (Run: 1)	z1	69.2307	32.5262	2.52906	0.469824	69.1456		0.0105228	11.5976	20.0497	9.63271	0.206894	10.0891	0.0300854	3.00019	0.296188	33.2387	3.00019	0.0498761	9.63271	2.45871e-16		211.578	24.41	189.188	224.142	190.943	17.5615	191.083	5.64871		-1.00156		190.946	5.79144	189.528	1161.34		123.849	4.6019	307.609	686961	0.709682		6.15453	0.0229205	0.575764	1.05664	0.483917
WS18/09 M 8 7/12/2020 2:05:54 PM (Run: 1)	z1	102.435	60.9792	3.92697	0.595297	85.6216		0.0108427	6.10361	19.4575	5.81547	0.214863	6.01478	0.0303214	1.53555	0.251426	32.98	1.53555	0.051394	5.81547	3.97864e-16		217.976	13.2329	258.517	133.624	197.626	10.8015	192.559	2.91313		25.5138		197.731	3.00756	190.067	1638.58		167.17	4.59052	531.992	676477	0.755774	0.0077377	8.43565	0.0657714	1.40038	2.95764	1.16659
Experiment on July 10, 2020
Isotope ratio and date errors do not include systematic calibration errors of 0.20% (207Pb/206Pb) and 0.70% (206Pb/238U) (2 sigma).
Trace element concentrations were deleted from analyses known to have intersected inclusions of other minerals based on P and Ti.
Ablation used a laser spot size of 25 microns and a laser firing repetition rate of 5 Hz.
Activity of TiO2 for Ti-in-Zircon temperature calculation is 0.8.
Experiment on July 12, 2020
Isotope ratio and date errors do not include systematic calibration errors of 0.26% (207Pb/206Pb) and 0.76% (206Pb/238U) (2 sigma).
Trace element concentrations were deleted from analyses known to have intersected inclusions of other minerals based on P and Ti.
Ablation used a laser spot size of 25 microns and a laser firing repetition rate of 5 Hz.
Activity of TiO2 for Ti-in-Zircon temperature calculation is 0.8.
ZS15/02_M247 7/10/2020 6:59:48 PM (Run: 1)		248.931	119.323	73.8808	0.479343	24249.2		0.0840131	2.30564	11.1326	0.668057	2.91114	1.37874	0.235048	1.20608	0.863562	4.25445	1.20608	0.0898265	0.668057	-1.37985e-16		1630.51	36.1174	1421.84	12.765	1384.81	10.4201	1360.9	14.7967		4.28614		1386.03	15.7981	1345.3	601.905		379.612	7.14376	1153.48	708584	5.98075		10.3793		1.07713	3.93236	0.380848
ZS15/02_L233 7/10/2020 6:16:08 PM (Run: 1)		253.896	77.5189	54.2245	0.305318	2678.53		0.0698183	3.38975	13.081	1.86437	1.89019	4.9831	0.179327	4.6212	0.926568	5.57639	4.6212	0.0764466	1.86437	0		1364.09	44.7136	1106.79	37.259	1077.65	33.0909	1063.3	45.2986		3.9296		1075.09	47.2768	1046.4	657.64		178.862	9.64686	760.682	713356	7.0817		10.6941	0.0249828	0.385362	2.44336	0.0873037
ZS15/02_L237 7/10/2020 6:32:03 PM (Run: 1)		271.572	91.5047	57.2863	0.336945	1668.51		0.0635513	2.8644	13.1867	1.16273	1.84729	3.51916	0.176674	3.32153	0.942253	5.66015	3.32153	0.0758337	1.16273	6.87964e-16		1245.34	34.5949	1090.67	23.2929	1062.47	23.1832	1048.78	32.1494		3.84064		1060.72	33.5176	1036.66	706.986		194.361	10.3136	983.122	755822	8.23233		11.3603	0.0867676	1.36975	3.73222	0.203176
ZS15/02_M251 7/10/2020 7:07:37 PM (Run: 1)		429.606	238.584	20.2517	0.555354	3607.26		0.0141732	3.92678	19.5801	2.42753	0.267619	4.2058	0.0380042	3.43451	0.815321	26.3129	3.43451	0.0510722	2.42753	0		284.46	11.0919	244.085	55.9234	240.788	9.01586	240.45	8.10617		1.48931		237.166	8.16934	232.096	1244.41		72.4809	8.09095	618.561	736732	1.32572		21.7313	0.0472067	0.716132	1.59795	0.767147
ZS15/02_M243 7/10/2020 6:43:51 PM (Run: 1)		156.107	75.6309	7.07056	0.48448	107.001		0.0133571	6.31939	18.9958	3.95602	0.2736	5.10201	0.0376939	3.22186	0.630357	26.5295	3.22186	0.0526433	3.95602	1.3636e-16		268.189	16.836	313.47	90.0049	245.568	11.1289	238.523	7.54444		23.9089		240.981	7.59961	230.747	1260.67		129.714	6.23505	474.429	737577	3.13031		19.5728	0.0217708	0.31788	1.43541	0.41535
ZS15/02_M255 7/10/2020 7:15:26 PM (Run: 1)		594.539	178.424	25.6081	0.300105	1489.75		0.0141249	4.32187	19.783	2.55752	0.261436	4.37292	0.0375108	3.54704	0.809934	26.659	3.54704	0.0505485	2.55752	1.92963e-16		283.497	12.1669	220.254	59.1742	235.824	9.20242	237.385	8.267		-7.77799		232.732	8.3367	231.659	769.808		102.972	3.39667	621.504	730340	2.51194	0.00776564	15.2551	0.017436	0.351834	1.44742	0.596236
ZS15/02_M250 7/10/2020 7:05:40 PM (Run: 1)		192.131	73.1382	8.16373	0.380669	218.427		0.0136264	6.29325	19.3617	4.60449	0.258046	5.27428	0.0362361	2.5723	0.486332	27.5968	2.5723	0.0516483	4.60449	0		273.559	17.0998	269.877	105.581	233.091	10.9849	229.46	5.79859		14.9761		228.759	5.86609	221.74	944.846		83.9837	3.94709	315.151	719812	0.570656		10.2843	0.00680464	0.0961835	0.686505	0.330821
ZS15/02_L238 7/10/2020 6:34:00 PM (Run: 1)		272.678	124.486	11.6754	0.456532	6755.32		0.0131156	5.64784	19.5819	3.46578	0.251734	4.94257	0.0357516	3.52383	0.711889	27.9708	3.52383	0.0510675	3.46578	0		263.372	14.7783	243.89	79.8438	227.983	10.0928	226.446	7.84104		7.15246		223.948	7.90242	218.975	565.456		103.108	5.73208	530.535	768425	1.31007		16.7803	0.028307	0.950125	0.98175	0.561727
ZS15/02_M248 7/10/2020 7:01:45 PM (Run: 1)		362.567	271.328	17.0957	0.748353	897.357		0.0138565	3.85987	19.8397	3.64524	0.247941	4.84202	0.0356765	3.18707	0.657002	28.0296	3.18707	0.050404	3.64524	4.50228e-16		278.146	10.6625	213.666	84.4409	224.903	9.76813	225.978	7.07731		-5.76249		221.154	7.14439	214.746	2043.52		163.168	10.0804	1207.04	721570	3.15422		44.3022	0.0971641	2.50615	5.97164	1.66775
ZS15/02_M242 7/10/2020 6:41:54 PM (Run: 1)		356.44	324.435	17.1767	0.91021	987.369		0.0133177	3.2376	19.9578	3.09142	0.241793	4.30595	0.034999	2.99738	0.694662	28.5722	2.99738	0.0501056	3.09142	1.88131e-16		267.403	8.60043	199.862	71.7936	219.888	8.51321	221.76	6.53395		-10.9564		216.169	6.594	209.819	2430.39		175.859	11.541	1734.1	727327	1.60639	0.00499159	12.5664	0.344242	5.82002	10.1547	3.06228
ZS15/02_M256 7/10/2020 7:23:33 PM (Run: 1)		455.929	312.02	20.484	0.68436	9572.11		0.0129623	3.4697	19.7413	2.97882	0.243886	3.81037	0.034919	2.37603	0.621504	28.6377	2.37603	0.0506552	2.97882	-1.23331e-16		260.312	8.97414	225.183	68.8586	221.598	7.58584	221.262	5.16804		1.74151		218.181	5.21594	212.617	1803.29		241.533	11.3775	923.985	746467	3.41272		18.7924	0.0599819	1.64597	4.0837	0.57594
ZS15/02_M241 7/10/2020 6:39:57 PM (Run: 1)		252.056	254.492	12.3342	1.00966	759.994		0.0129788	3.88102	19.048	3.45804	0.251553	4.4851	0.0347518	2.85623	0.635376	28.7755	2.85623	0.052499	3.45804	0		260.642	10.0506	307.199	78.7641	227.837	9.15339	220.22	6.18375		28.3137		223.809	6.22225	207.779	2755.09		185.085	14.1589	1305.46	717525	1.76138	0.0205497	14.6785	0.158224	3.80506	9.025	1.83418
ZS15/02_L239 7/10/2020 6:35:58 PM (Run: 1)		203.291	132.017	8.7503	0.649398	639.964		0.0114484	6.50818	19.3488	4.93765	0.246526	5.80192	0.0345951	3.04662	0.524055	28.9058	3.04662	0.0516829	4.93765	-4.62281e-16		230.083	14.8893	271.388	113.19	223.75	11.651	219.243	6.56721		19.2141		219.555	6.63128	212.985	1639.64		224.998	9.70994	809.233	764110	1.57182		15.937	0.0685725	1.68115	2.86412	0.925486
ZS15/02_M244 7/10/2020 6:45:49 PM (Run: 1)		197.946	129.346	8.76632	0.653439	188.923		0.0133622	4.75716	19.2896	4.19422	0.246843	5.16146	0.0345335	3.00819	0.581619	28.9574	3.00819	0.0518415	4.19422	0		268.29	12.6786	278.419	96.0263	224.008	10.3755	218.86	6.4732		21.3918		219.845	6.52575	208.422	989.246		204.096	11.8863	792.849	709420	3.04555		22.6394	0.0911733	1.15279	3.30588	0.850127
ZS15/02_L232 7/10/2020 6:14:10 PM (Run: 1)		113.86	46.4229	4.62191	0.407721	330.028		0.0131177	8.12411	19.4178	4.89907	0.243479	5.98621	0.0342894	3.44004	0.573761	29.1635	3.44004	0.0514991	4.89907	0		263.414	21.2612	263.229	112.471	221.265	11.9016	217.339	7.35192		17.4336		216.864	7.41594	209.208	948.407		147.597	9.146	329.394	709171	0.8225		8.47358	0.0259713	0.352636	1.02633	0.608676
ZS15/02_L234 7/10/2020 6:18:05 PM (Run: 1)		147.04	86.7264	6.28295	0.589814	264.162		0.0133302	6.49626	20.1472	6.37493	0.232458	7.40245	0.0339669	3.76253	0.507615	29.4404	3.76253	0.0496347	6.37493	0		267.653	17.2728	177.902	148.644	212.225	14.1768	215.328	7.96797		-21.0378		207.946	8.07073	205.109	1047.5		178.21	9.51751	738.887	727290	1.85643		14.1318	0.0238503	1.01415	3.1962	1.07401
ZS15/02_M253 7/10/2020 7:11:31 PM (Run: 1)		332.273	186.079	14.066	0.560019	3701.55		0.0133572	3.96158	19.5904	3.01747	0.23797	4.16077	0.0338114	2.86476	0.686951	29.5758	2.86476	0.0510455	3.01747	2.01533e-16		268.19	10.5544	242.89	69.5287	216.756	8.1211	214.358	6.03987		11.7466		213.038	6.08413	204.967	1555.84		156.726	6.66295	803.633	729897	4.65934	0.0168029	24.2919	0.03881	1.13199	2.55188	0.996764
ZS15/02_L236 7/10/2020 6:30:06 PM (Run: 1)		478.527	248.628	19.0864	0.51957	950.742		0.0117495	3.57851	19.9035	2.54087	0.226719	4.34812	0.0327277	3.52847	0.810284	30.5552	3.52847	0.0502425	2.54087	0		236.098	8.39964	206.206	58.9392	207.487	8.1597	207.597	7.20832		-0.674888		204.258	7.25844	201.368	1315.48		95.1146	4.4767	560.84	741485	2.3149	0.00761228	19.4124	0.0262528	0.365947	0.693892	0.442358
ZS15/02_M246 7/10/2020 6:57:51 PM (Run: 1)		299.346	160.354	12.2584	0.535683	698.045		0.0124973	2.63864	19.7536	3.92049	0.232225	5.22745	0.0332701	3.45774	0.660428	30.057	3.45774	0.0506236	3.92049	1.2842e-16		251.031	6.58285	223.728	90.6508	212.034	10.0032	210.982	7.17714		5.69705		208.228	7.23535	202.959	1401.9		105.693	5.51057	569.895	739178	2.76682		23.2382	0.0277187	0.511469	1.64374	0.617402
ZS15/02 M 9 7/12/2020 2:07:52 PM (Run: 1)		419.418	455.65	19.7865	1.08639	2748.67		0.0119232	2.3678	19.3744	2.2645	0.231526	4.0511	0.0325332	3.35908	0.826551	30.7379	3.35908	0.0516146	2.2645	-2.33598e-16		239.569	5.63901	268.398	51.9385	211.458	7.73321	206.383	6.82278		23.1056		211.61	6.85192	199.973	2956.7		111.41	5.06267	735.746	687899	2.287		26.9106	0.0550484	1.49668	2.4118	0.958881
ZS15/02_L235 7/10/2020 6:20:02 PM (Run: 1)		133.234	117.118	5.99521	0.879042	116.265		0.0122772	5.86754	19.4398	6.29945	0.235973	7.41421	0.0332701	3.90991	0.526714	30.057	3.90991	0.0514407	6.29945	-1.41041e-16		246.637	14.3836	260.649	144.686	215.118	14.373	210.982	8.11569		19.055		210.89	8.19285	200.238	2437.44		201.797	6.47356	801.042	740668	1.34322		17.3231	0.0382972	1.06455	3.41086	0.725097
ZS15/02_M249 7/10/2020 7:03:43 PM (Run: 1)		216.508	136.547	9.02417	0.630679	871.902		0.0122869	4.88307	19.4957	5.15179	0.233174	5.62159	0.0329699	2.24973	0.39872	30.3307	2.24973	0.0512933	5.15179	-4.50114e-16		246.831	11.9796	254.019	118.47	212.815	10.7931	209.109	4.6289		17.6797		208.839	4.69758	200.365	1609.83		112.724	6.72831	814.244	739836	1.73492	0.0143264	20.3524	0.121943	1.75707	4.09824	1.17506
ZS15/02 M 10 7/12/2020 2:09:49 PM (Run: 1)		228.48	126.16	9.34254	0.552172	195.28		0.0114708	4.76918	20.5191	3.97793	0.221377	4.61865	0.0329451	2.34691	0.50484	30.3536	2.34691	0.048735	3.97793	-1.90303e-16		230.53	10.9319	135.068	93.4885	203.055	8.50017	208.954	4.82534		-54.7033		202.974	4.89084	207.037	577.016		80.5838	5.60804	537.925	685667	1.82746		16.7946	0.0366127	0.606444	1.21498	0.666372
ZS15/02 M 11 7/12/2020 2:19:55 PM (Run: 1)		183.057	99.7688	7.99815	0.545014	239.881		0.0125313	4.30495	20.3477	3.98849	0.238055	5.22754	0.0351311	3.37921	0.644402	28.4648	3.37921	0.0491456	3.98849	0		251.711	10.7689	154.793	93.3941	216.827	10.2062	222.582	7.39315		-43.7935		216.745	7.47517	220.018	1453.21		108.642	5.31017	440.873	694809	1.42618		13.3447	0.0288011	0.310263	0.749385	0.533382
Experiment on July 10, 2020
Isotope ratio and date errors do not include systematic calibration errors of 0.20% (207Pb/206Pb) and 0.70% (206Pb/238U) (2 sigma).
Trace element concentrations were deleted from analyses known to have intersected inclusions of other minerals based on P and Ti.
Ablation used a laser spot size of 25 microns and a laser firing repetition rate of 5 Hz.
Activity of TiO2 for Ti-in-Zircon temperature calculation is 0.8.
Experiment on July 12, 2020
Isotope ratio and date errors do not include systematic calibration errors of 0.26% (207Pb/206Pb) and 0.76% (206Pb/238U) (2 sigma).
Trace element concentrations were deleted from analyses known to have intersected inclusions of other minerals based on P and Ti.
Ablation used a laser spot size of 25 microns and a laser firing repetition rate of 5 Hz.
Activity of TiO2 for Ti-in-Zircon temperature calculation is 0.8.
ZS15/04 XS 107 7/12/2020 6:40:20 PM (Run: 1)		205.053	122.952	80.0176	0.599611	3302.6		0.1005	3.03316	9.10396	1.34358	4.49817	4.03151	0.297006	3.80104	0.940485	3.36694	3.80104	0.109842	1.34358	3.48186e-16		1935.61	55.9865	1796.78	24.4539	1730.63	33.49	1676.44	56.1104		6.69724		1731.76	61.7143	1657.96	765.869
ZS15/04 XS 103 7/12/2020 6:32:32 PM (Run: 1)		91.408	54.7401	34.0721	0.598854	1298.62		0.0882851	3.34973	9.80123	1.69203	4.08175	4.47443	0.290152	4.14217	0.923803	3.44646	4.14217	0.102028	1.69203	0		1710.01	54.9247	1661.33	31.3234	1650.66	36.4923	1642.29	60.0525		1.14623		1651.02	66.099	1637.63	756.423
ZS15/04 XS 104 7/12/2020 6:34:29 PM (Run: 1)		190.144	200.087	9.343	1.05229	416.615		0.0116155	5.60908	19.6549	4.01994	0.246392	5.3227	0.0351234	3.48873	0.653508	28.471	3.48873	0.0508779	4.01994	-1.26671e-16		233.422	13.0175	235.31	92.7546	223.641	10.684	222.535	7.63117		5.42914		223.678	7.69436	220.516	2862.89		238.412	18.6728	1198.52	801906	1.55541		19.7341	0.275492	4.93595	7.26223	1.65049
ZS15/04 XS 105 7/12/2020 6:36:26 PM (Run: 1)		760.163	162.133	28.9345	0.213288	15279.8		0.0121965	6.77116	18.9837	4.1504	0.244585	4.80316	0.0336751	2.41754	0.500227	29.6955	2.41754	0.0526767	4.1504	0		245.026	16.491	314.886	94.4045	222.168	9.58433	213.509	5.07712		32.1949		222.401	5.12026	212.546	511.967		191.296	4.53304	1423.9	798579	7.1371	0.0268487	12.9353	0.0542846	0.523437	2.49184	1.35552
ZS15/04 XS 102 7/12/2020 6:30:35 PM (Run: 1)		280.504	156.286	11.2791	0.557163	290.125		0.0111832	5.43516	19.9511	3.84478	0.223592	5.31908	0.0323536	3.67564	0.689191	30.9085	3.67564	0.0501226	3.84478	1.25713e-16		224.782	12.1496	200.68	89.2743	204.895	9.86931	205.262	7.42583		-2.28308		204.911	7.48411	203.504	1402.98		225.391	11.1752	877.356	796457	2.75332		19.5124	0.0301921	1.25961	3.7881	0.768107
Experiment on July 12, 2020
Isotope ratio and date errors do not include systematic calibration errors of 0.26% (207Pb/206Pb) and 0.76% (206Pb/238U) (2 sigma).
Trace element concentrations were deleted from analyses known to have intersected inclusions of other minerals based on P and Ti.
Ablation used a laser spot size of 25 microns and a laser firing repetition rate of 5 Hz.
Activity of TiO2 for Ti-in-Zircon temperature calculation is 0.8.
ZS18/01 S 114 7/12/2020 7:00:07 PM (Run: 1)		152.737	95.5347	55.9984	0.625484	662.708		0.0681583	3.81951	9.64435	1.53036	4.19396	2.96704	0.293357	2.54191	0.851942	3.40882	2.54191	0.103688	1.53036	0		1332.71	49.261	1691.16	28.2228	1672.84	24.3265	1658.28	37.1669		1.94434		1673.49	41.0192	1685.45	1146.87		143.983	7.82201	973.717	998578	3.47237	0.0214863	14.4242	0.0318731	1.04775	2.75641	0.402456
ZS18/01 S 116 7/12/2020 7:04:01 PM (Run: 1)		153.469	320.258	62.5139	2.0868	1000.24		0.0633482	2.81976	11.244	1.82817	3.09666	3.60795	0.25253	3.11048	0.858909	3.95993	3.11048	0.0889363	1.82817	0		1241.48	33.9534	1402.77	35.0237	1431.86	27.692	1451.51	40.4269		-3.47421		1432.17	43.7927	1524.83	3371.49		159.016	11.5842	1140.59	982620	3.37879	0.0774242	35.3707	0.362863	6.46235	9.24337	2.7097
ZS18/01 XS 135 7/12/2020 7:49:30 PM (Run: 1)		357.748	340.031	122.125	0.950477	5867.21		0.0762151	2.67232	11.1436	1.22943	3.04897	4.7454	0.24642	4.58338	0.964193	4.0581	4.58338	0.0897378	1.22943	-3.15706e-16		1484.59	38.2509	1419.97	23.4975	1419.98	36.2837	1419.99	58.4139		-0.00159111		1421.1	62.8329	1413.44	66.9528		174.539	3.86155	1130.13	750711	5.7198		44.2163	0.115814	3.28972	6.62359	1.04638
ZS18/01 XS 130 7/12/2020 7:35:32 PM (Run: 1)		39.4189	32.4305	10.6229	0.822714	157.432		0.069647	5.33452	12.7373	3.20463	2.12949	5.20999	0.196721	4.10784	0.786766	5.08334	4.10784	0.0785097	3.20463	0		1360.86	70.2052	1159.79	63.5462	1158.42	35.9972	1157.68	43.5301		0.181608		1158.5	45.9226	1133.3	1042.67		208.668	18.7095	913.936	764056	2.87775	0.036625	6.11467	0.228501	5.36183	7.80602	1.00768
ZS18/01 S 111 7/12/2020 6:54:16 PM (Run: 1)		46.3501	34.1881	11.4686	0.737604	388.963		0.0498491	6.04862	13.0457	3.81506	2.06777	5.58538	0.195644	4.07944	0.728797	5.11132	4.07944	0.0766537	3.81506	-1.14151e-16		983.249	58.0496	1112.2	76.1819	1138.19	38.2263	1151.88	43.0312		-3.56758		1138.16	45.5297	1169.82	1059.89		122.179	14.039	837.454	964816	2.33618		5.56241	0.0639174	1.18317	3.27325	0.231449
ZS18/01 S 119 7/12/2020 7:09:53 PM (Run: 1)		47.5206	38.6244	11.9134	0.812794	463.643		0.0503281	6.51394	12.4451	2.67585	2.15119	4.45293	0.194168	3.55926	0.797034	5.15019	3.55926	0.0803528	2.67585	1.86534e-16		992.468	63.0873	1205.66	52.7073	1165.44	30.866	1143.91	37.307		5.12184		1165.69	39.18	1161.89	1153.86		158.379	14.566	646.386	990003	3.13563		7.25686	0.0779334	0.748337	2.30124	0.134447
ZS18/01 XS 124 7/12/2020 7:23:47 PM (Run: 1)		78.6844	69.1464	21.2762	0.878781	213.542		0.0713025	5.56512	12.5504	2.24065	2.11338	3.92821	0.192369	3.22651	0.81852	5.19835	3.22651	0.0796788	2.24065	-1.22881e-16		1392.11	74.8651	1189.03	44.2419	1153.18	27.0751	1134.19	33.5564		4.61188		1153.48	35.2164	1100.72	1901.68		261.408	17.5107	979.552	710303	4.22251	0.0159236	9.44827	0.127814	3.43485	6.93669	0.703161
ZS18/01 S 120 7/12/2020 7:11:50 PM (Run: 1)		59.9815	57.8895	14.9299	0.965122	225.521		0.0446933	3.47728	13.3213	2.68694	1.9808	3.97187	0.191376	2.92508	0.733346	5.22532	2.92508	0.0750677	2.68694	2.26049e-16		883.742	30.068	1070.3	53.9911	1108.99	26.7999	1128.82	30.2896		-5.46778		1108.93	32.0215	1164.04	1450.13		187.699	18.3484	965.053	977303	4.64648		8.48454	0.0583743	1.83632	3.89794	0.233527
ZS18/01 XS 131 7/12/2020 7:41:41 PM (Run: 1)		174.932	74.9221	40.8242	0.428292	3576.29		0.0667605	3.51739	12.7828	1.54671	2.04752	3.94382	0.189825	3.62787	0.917359	5.26801	3.62787	0.0782299	1.54671	0		1306.24	44.4923	1152.73	30.7017	1131.47	26.9047	1120.43	37.3113		2.80239		1131.91	39.1167	1109.89	#VALUE!		127.641	5.30809	1421.88	762799	23.7095	0.00880051	20.1355	0.0734849	2.77696	6.3966	0.378369
ZS18/01 XS 126 7/12/2020 7:27:41 PM (Run: 1)		58.2597	37.2043	14.4721	0.638594	386.33		0.068433	2.69606	12.6747	3.6185	2.06369	4.66884	0.189706	2.95034	0.6293	5.27132	2.95034	0.0788972	3.6185	1.66417e-16		1337.9	34.9027	1169.56	71.6501	1136.84	31.9329	1119.78	30.3271		4.25584		1137.09	31.9464	1099.94	911.34		177.254	14.7457	814.336	726119	3.05068		7.20351	0.0978118	2.04858	4.96996	0.25046
ZS18/01 S 110 7/12/2020 6:46:16 PM (Run: 1)		78.0722	47.7317	18.2364	0.611379	1056.59		0.0475874	4.85994	12.8226	2.82595	2.03935	3.49331	0.189656	2.05358	0.582847	5.2727	2.05358	0.0779872	2.82595	0		939.658	44.6216	1146.55	56.1456	1128.74	23.8	1119.51	21.1046		2.35783		1128.96	22.2938	1135.28	650.859		67.4867	5.23125	1149.99	949507	9.17731		9.89669	0.0496851	1.66912	3.21973	0.288375
ZS18/01 XS 125 7/12/2020 7:25:44 PM (Run: 1)		128.438	68.1449	30.9609	0.530566	1194.3		0.0706397	3.25388	12.9853	2.43358	2.00632	4.72567	0.188952	4.05088	0.855322	5.29236	4.05088	0.0770102	2.43358	-3.60516e-16		1379.61	43.393	1121.46	48.5289	1117.65	32.0227	1115.69	41.5005		0.51454		1117.91	43.5931	1096.25	1085.82		83.3692	0.533244	3713.99	703272	9.49091	8.68962	40.8766	1.29403	8.74099	12.0775	1.88279
ZS18/01 XS 121 7/12/2020 7:17:55 PM (Run: 1)		68.002	38.1257	16.0397	0.560656	279.341		0.0638455	7.25601	12.8025	2.96792	1.99831	5.52872	0.185549	4.66457	0.842299	5.38941	4.66457	0.0781095	2.96792	0		1250.93	88.016	1149.67	58.9389	1114.94	37.4146	1097.22	47.0618		4.5623		1115.21	49.25	1085.13	1178.47		124.781	16.1515	1181.13	743415	3.79436	0.0660018	8.10412	0.477793	7.36626	12.4306	1.04857
ZS18/01 XS 122 7/12/2020 7:19:52 PM (Run: 1)		49.9376	38.0526	12.4375	0.762004	715.541		0.0663897	4.34928	12.8225	3.44771	1.97952	4.88777	0.184091	3.46462	0.706703	5.4321	3.46462	0.0779876	3.44771	1.48728e-16		1299.21	54.7286	1146.57	68.4982	1108.56	32.9727	1089.28	34.7233		4.99585		1108.8	36.3997	1065.88	1675.45		189.715	21.6327	828.35	720359	3.5287		6.68218	0.112414	2.84302	4.80586	0.315323
ZS18/01 S 118 7/12/2020 7:07:56 PM (Run: 1)		112.672	110.436	26.5367	0.980158	1581.42		0.0419545	4.3914	12.8598	1.95095	1.93338	2.76528	0.180323	1.95974	0.702044	5.54561	1.95974	0.0777618	1.95095	2.32369e-16		830.684	35.7392	1140.81	38.7935	1092.71	18.5063	1068.74	19.3004		6.31786		1093.11	20.1866	1104.07	2209.43		96.6342	10.3496	1639.4	998395	7.91178		14.229	0.246134	3.62984	7.93401	0.957829
ZS18/01 S 117 7/12/2020 7:05:59 PM (Run: 1)		200.437	73.5337	41.8599	0.366867	450.741		0.0422338	6.09045	13.5137	2.24617	1.83587	3.86516	0.179935	3.1455	0.810845	5.55756	3.1455	0.0739988	2.24617	1.25774e-16		836.101	49.8835	1041.43	45.3304	1058.38	25.407	1066.62	30.9219		-2.41835		1058.64	32.4456	1078.79	509.457		113.5	3.58042	622.8	992648	4.21855		8.46433	0.0393015	0.582627	1.43995	0.0912357
ZS18/01 XS 137 7/12/2020 7:53:24 PM (Run: 1)		175.3	78.9419	38.4137	0.450325	1668.42		0.0570708	4.42216	12.813	1.37672	1.92982	3.50945	0.179336	3.22814	0.916648	5.57612	3.22814	0.0780455	1.37672	-1.99952e-16		1121.81	48.2566	1148.05	27.3461	1091.48	23.4717	1063.35	31.6447		7.37807		1092.07	32.946	1060.18	33.9055		190.638	14.3725	693.472	770861	5.04935		9.20246	0.0610485	1.07804	2.21097	0.199726
ZS18/01 XS 136 7/12/2020 7:51:27 PM (Run: 1)		130.376	54.3412	28.139	0.416802	784.499		0.0588352	4.01748	13.213	1.9725	1.85518	4.08989	0.177781	3.5828	0.873544	5.6249	3.5828	0.0756832	1.9725	-2.51449e-16		1155.52	45.1206	1086.68	39.5386	1065.27	26.9832	1054.84	34.8627		2.92985		1065.61	36.4054	1049.33	37.1026		193.522	12.0254	1004.1	763049	3.42941		6.61451	0.0210662	1.26495	4.59967	0.356958
ZS18/01 XS 129 7/12/2020 7:33:35 PM (Run: 1)		240.93	166.154	11.6118	0.689636	441.788		0.0138852	3.14121	19.1812	3.8813	0.263824	5.27052	0.0367018	3.56566	0.674607	27.2466	3.56566	0.0521345	3.8813	-1.28371e-16		278.72	8.69508	291.311	88.6563	237.744	11.1715	232.357	8.13751		20.2377		237.868	8.19183	227.042	1819.21		208.899	7.44967	1402.23	743631	5.95337		30.8234	0.0390642	1.35466	4.64422	2.10997
ZS18/01 S 115 7/12/2020 7:02:04 PM (Run: 1)		146.417	178.117	6.86318	1.2165	131.51		0.00781341	4.83537	19.3384	6.12373	0.25332	6.4452	0.0355296	2.01011	0.309096	28.1456	2.01011	0.0517105	6.12373	5.77271e-16		157.312	7.57709	272.654	140.346	229.269	13.2274	225.063	4.44596		17.4546		229.359	4.55176	240.14	3424.56		110.687	18.896	1137.19	992333	2.08617		12.1493	0.160623	3.24437	5.8388	0.556172
ZS18/01 XS 133 7/12/2020 7:45:36 PM (Run: 1)		224.369	224.371	10.9179	1.00001	468.07		0.0119757	5.8295	18.7038	3.20403	0.256677	4.82312	0.0348188	3.6051	0.745381	28.7201	3.6051	0.0534652	3.20403	1.53803e-16		240.617	13.9436	348.575	72.4434	231.985	10.0028	220.637	7.81961		36.7029		232.214	7.84289	217.137	9.65529		209.579	13.7506	1051.99	767506	2.66611	0.0329173	22.2377	0.120219	3.93408	7.69499	1.55215
ZS18/01 XS 132 7/12/2020 7:43:39 PM (Run: 1)		295.211	200.085	13.1172	0.677771	1525.51		0.0116889	4.37048	19.0483	3.83672	0.251065	5.01547	0.0346849	3.23025	0.641825	28.831	3.23025	0.0524981	3.83672	0		234.889	10.2063	307.142	87.391	227.441	10.2199	219.803	6.9805		28.436		227.609	7.02096	218.129	#VALUE!		126.007	5.91334	633.404	772669	1.44506	0.0244399	20.1913	0.0165412	1.5715	3.25674	0.823143
ZS18/01 S 109 7/12/2020 6:44:19 PM (Run: 1)		299.824	320.429	13.3904	1.06872	414.642		0.00866187	3.3894	18.7843	2.5244	0.246702	3.69641	0.0336098	2.70015	0.726876	29.7533	2.70015	0.053236	2.5244	1.3032e-16		174.321	5.88304	338.907	57.1736	223.894	7.4271	213.101	5.65999		37.1212		224.119	5.67732	220.534	3130.56		197.643	8.94796	2201.84	930205	2.12651	0.0276908	22.5628	0.309064	6.67305	11.0298	2.56672
ZS18/01 XS 123 7/12/2020 7:21:49 PM (Run: 1)		255.246	137.6	10.8015	0.539086	228.363		0.0132616	5.42018	19.1441	4.28679	0.24069	5.44624	0.0334189	3.35931	0.61484	29.9232	3.35931	0.0522355	4.28679	-1.23367e-16		266.284	14.3384	295.734	97.8407	218.986	10.7281	211.91	7.00299		28.3443		219.139	7.04617	207.139	916.717		199.558	9.82057	748.562	713195	1.6055	0.00983666	12.0287	0.101675	1.873	2.65118	1.39142
ZS18/01 S 113 7/12/2020 6:58:10 PM (Run: 1)		916.742	569.334	35.9971	0.621041	3913.47		0.00805332	3.43616	20.085	2.12299	0.223968	3.26397	0.0326253	2.47919	0.755113	30.651	2.47919	0.0497885	2.12299	1.68824e-16		162.123	5.54852	185.12	49.4359	205.207	6.06445	206.958	5.04941		-11.7971		205.256	5.08861	211.666	1118.88		339.015	3.23336	2466.82	1.01127e+06	10.9708		16.8571	0.0940681	1.64294	4.99835	0.573596
ZS18/01 XS 128 7/12/2020 7:31:38 PM (Run: 1)	z3	246.362	132.457	9.9244	0.53765	509.261		0.0121112	5.70438	18.9343	3.5667	0.233568	4.9272	0.0320747	3.3994	0.687769	31.1773	3.3994	0.0528142	3.5667	1.46523e-16		243.322	13.7968	320.788	81.0433	213.14	9.47285	203.52	6.81038		36.5563		213.338	6.83506	200.038	1344.61		245.579	10.488	716.972	749821	2.72792	0.802359	17.313	0.179304	2.01619	2.86362	0.850665
ZS18/01 S 112 7/12/2020 6:56:13 PM (Run: 1)	z1	466.789	528.546	19.3888	1.1323	1798.17		0.00761795	4.53447	21.0474	3.88801	0.205774	4.77393	0.0314115	2.77016	0.577545	31.8355	2.77016	0.0475117	3.88801	0		153.392	6.92916	75.0167	92.4014	190	8.27237	199.376	5.4385		-165.776		189.859	5.50953	208.847	2083.79		406.767	3.04459	2989.3	979908	12.7003		42.0485	0.0133002	0.82674	4.18047	1.45736
ZS18/01 XS 134 7/12/2020 7:47:33 PM (Run: 1)	z4	424.9	263.187	16.7229	0.619409	534.861		0.0103277	4.05005	19.3497	3.84252	0.223279	4.9097	0.0313344	3.05617	0.620066	31.9139	3.05617	0.0516805	3.84252	0		207.675	8.36786	271.311	88.0858	204.636	9.09929	198.894	5.98573		26.6916		204.778	6.02212	198.033	6.7088		1004.49	9.17654	4728.03	772178	6.07595	0.0353242	8.28874	0.190257	4.67909	14.0262	1.84005
ZS18/01 XS 127 7/12/2020 7:29:38 PM (Run: 1)	z2	409.59	291.673	16.4066	0.712109	465.846		0.0114698	3.38734	20.02	4.66773	0.209132	5.96905	0.0303658	3.72046	0.621666	32.9318	3.72046	0.0499499	4.66773	-2.04615e-16		230.51	7.76382	192.634	108.544	192.824	10.4829	192.837	7.06819		-0.105318		192.856	7.12656	188.346	1871.58		165.394	2.79549	1471.03	727655	2.72992		32.0236	0.135163	2.74405	6.40157	2.37181
Experiment on July 12, 2020
Isotope ratio and date errors do not include systematic calibration errors of 0.26% (207Pb/206Pb) and 0.76% (206Pb/238U) (2 sigma).
Trace element concentrations were deleted from analyses known to have intersected inclusions of other minerals based on P and Ti.
Ablation used a laser spot size of 25 microns and a laser firing repetition rate of 5 Hz.
Activity of TiO2 for Ti-in-Zircon temperature calculation is 0.8.
ZS18/07_M264 7/10/2020 7:39:22 PM (Run: 1)		142.575	83.6233	53.4153	0.586523	3498.25		0.0989129	2.50514	9.66362	0.982643	4.11483	2.40856	0.288397	2.199	0.90945	3.46744	2.199	0.103481	0.982643	2.0448e-16		1906.44	45.5758	1687.48	18.1304	1657.25	19.6747	1633.51	31.731		3.198		1653.26	34.8381	1604.76	1160.65		218.062	13.5212	777.192	765185	3.55934		14.0796	0.0479582	1.17202	2.78065	0.520418
ZS18/07_L258 7/10/2020 7:27:34 PM (Run: 1)		189.615	111.022	45.546	0.585512	2652.19		0.0621187	2.74026	13.2539	1.50697	1.98988	4.46251	0.191279	4.20036	0.940257	5.22796	4.20036	0.0754497	1.50697	5.56135e-16		1218.1	32.3931	1080.5	30.2346	1112.08	30.1566	1128.3	43.477		-4.42352		1105.77	45.8163	1110.57	1243.2		176.431	14.0392	1132.04	790863	3.79875		8.89773	0.138378	2.64379	5.74642	0.380637
ZS18/07_M261 7/10/2020 7:33:30 PM (Run: 1)		316.421	96.4338	65.7803	0.304764	1043.59		0.0662353	3.48011	13.3105	1.52396	1.80636	2.5713	0.17438	2.07102	0.80192	5.7346	2.07102	0.0751286	1.52396	-1.40872e-16		1296.29	43.6961	1071.94	30.6145	1047.76	16.8052	1036.2	19.824		3.33458		1048.63	20.6906	1026.35	631.402		196.772	9.97942	905.107	740302	7.18827	0.00204379	10.571	0.0881414	2.20891	3.36624	0.275375
ZS18/07_M259 7/10/2020 7:29:36 PM (Run: 1)		465.446	263.806	20.725	0.566782	851.773		0.0134723	3.48899	20.055	3.25739	0.245725	4.2475	0.0357413	2.72593	0.640156	27.9789	2.72593	0.0498629	3.25739	1.96683e-16		270.487	9.3744	188.605	75.8027	223.097	8.50727	226.381	6.0639		-20.0293		219.664	6.12787	218.182	1426.76		133.273	8.10715	673.627	728606	2.56157		24.6766	0.0355	1.15816	1.83066	0.752465
ZS18/07_M263 7/10/2020 7:37:24 PM (Run: 1)		281.766	141.516	12.2581	0.502247	650.551		0.0134109	5.43428	19.286	3.06565	0.254952	4.31067	0.0356616	3.03045	0.701576	28.0414	3.03045	0.051851	3.06565	3.74848e-16		269.262	14.5354	278.804	70.1839	230.591	8.89214	225.885	6.7268		18.9807		226.595	6.77168	217.597	1310.01		69.2596	6.58015	651.693	766745	0.964111		16.2377	0.0821401	1.51108	2.33544	1.13155
ZS18/07_M267 7/10/2020 7:51:25 PM (Run: 1)		267.651	210.287	12.5584	0.785676	2176.84		0.0134564	3.67886	19.6913	3.96374	0.247154	4.76897	0.0352972	2.65176	0.554558	28.3308	2.65176	0.0507839	3.96374	-1.65624e-16		270.169	9.873	231.041	91.5288	224.262	9.59626	223.617	5.82811		3.21321		220.251	5.88966	212.404	#VALUE!		96.1774	9.65594	1076.8	761635	1.70785		24.8854	0.123281	1.49566	3.17001	1.79412
ZS18/07_M260 7/10/2020 7:31:32 PM (Run: 1)		934.255	635.605	42.3373	0.680333	905.69		0.0132804	2.55564	18.9036	1.87226	0.253807	2.74707	0.0347975	2.01024	0.728382	28.7377	2.01024	0.0529	1.87226	0		266.658	6.77006	324.48	42.5138	229.664	5.64642	220.504	4.3577		32.0438		227.831	4.376	212.899	1737.21		101.825	4.14721	575.213	760379	2.81064	0.0742531	28.4311	0.319934	2.84607	3.84092	1.86464
ZS18/07_S270 7/10/2020 7:57:19 PM (Run: 1)		243.363	286.923	11.362	1.17899	202.691		0.00973323	3.67555	19.6948	4.94062	0.239583	6.05593	0.034222	3.50208	0.577401	29.221	3.50208	0.0507748	4.94062	0		195.778	7.16118	230.598	114.097	218.079	11.8848	216.918	7.47025		5.93222		214.017	7.5424	216.071	9.39842		234.088	4.61306	1405.15	921002	7.61443	0.0106879	46.986	0.0465572	0.984681	3.40758	0.728683
ZS18/07_S271 7/10/2020 7:59:17 PM (Run: 1)		136.014	107.961	5.87308	0.793751	97.2359		0.0104956	5.40584	19.5859	5.14314	0.238701	5.62309	0.0339075	2.27316	0.402781	29.492	2.27316	0.0510571	5.14314	-1.48574e-16		211.034	11.3488	243.453	118.494	217.356	11.0025	214.958	4.80576		11.7046		213.062	4.8791	210.169	5.78889		214.683	2.65495	1073.9	907776	2.99056	1.7025	22.4286	0.441118	3.01062	3.7039	0.495603
ZS18/07_M268 7/10/2020 7:53:22 PM (Run: 1)	z2	338.728	184.2	13.2787	0.5438	348.422		0.0114494	2.79097	20.0065	3.64264	0.22073	4.75901	0.0320282	3.06257	0.64224	31.2225	3.06257	0.0499837	3.64264	-1.56135e-16		230.102	6.38565	194.262	84.6791	202.518	8.73754	203.23	6.12697		-4.61649		198.934	6.18097	196.596	#VALUE!		174.422	4.57119	753.473	752945	2.88429	0.206387	13.0295	0.0385481	0.966827	1.86735	0.211198
ZS18/07_M265 7/10/2020 7:41:19 PM (Run: 1)	z1	371.199	276.247	15.3767	0.744203	491.617		0.0112953	3.88816	19.1666	3.34093	0.230099	4.66352	0.031986	3.25371	0.696457	31.2637	3.25371	0.052174	3.34093	4.80965e-16		227.023	8.77763	293.025	76.2904	210.281	8.85766	202.966	6.50104		30.7343		206.822	6.53184	195.673	1423.62		194.354	11.365	939.784	765145	2.7453	0.101408	12.7686	0.113018	2.12842	3.77612	0.642716
ZS18/07 M 12 7/12/2020 2:21:53 PM (Run: 1)	z1	290.041	195.946	12.1559	0.675581	4545.06		0.011783	4.81746	18.5293	3.75455	0.23965	4.89164	0.0322058	3.13553	0.638667	31.0503	3.13553	0.0539687	3.75455	-3.01839e-16		236.767	11.3396	369.754	84.5726	218.134	9.60203	204.339	6.30662		44.7365		218.426	6.32357	200.713	1758.67		228.641	13.0189	948.24	709780	2.87257	0.0665089	11.6167	0.0735501	2.06407	4.13558	0.694335
Experiment on July 10, 2020
Isotope ratio and date errors do not include systematic calibration errors of 0.20% (207Pb/206Pb) and 0.70% (206Pb/238U) (2 sigma).
Trace element concentrations were deleted from analyses known to have intersected inclusions of other minerals based on P and Ti.
Ablation used a laser spot size of 25 microns and a laser firing repetition rate of 5 Hz.
Activity of TiO2 for Ti-in-Zircon temperature calculation is 0.8.
Experiment on July 12, 2020
Isotope ratio and date errors do not include systematic calibration errors of 0.26% (207Pb/206Pb) and 0.76% (206Pb/238U) (2 sigma).
Trace element concentrations were deleted from analyses known to have intersected inclusions of other minerals based on P and Ti.
Ablation used a laser spot size of 25 microns and a laser firing repetition rate of 5 Hz.
Activity of TiO2 for Ti-in-Zircon temperature calculation is 0.8.
[truncated: 92 more columns]
